# Supplementary material for: Evaluation of the COPING parent online universal programme: study protocol for a pilot randomised controlled trial
Source: PubMed Central journal article supplement — BMJ Open. 2017 Apr 26;7(4):e013381. doi: 10.1136/bmjopen-2016-013381 (PMC5623353; doi:10.1136/bmjopen-2016-013381), 2017-04-26
Supplement: bmjopen-2016-013381.draft_revisions.pdf [file bmjopen-2016-013381.draft_revisions.pdf]

# BMJ Open

## Evaluation of an online parenting programme based on 'The Little parent Handbook': Study protocol for a pilot randomised controlled trial

|                                 |                                                                                                                                                       |
|---------------------------------|-------------------------------------------------------------------------------------------------------------------------------------------------------|
| Journal:                        | <i>BMJ Open</i>                                                                                                                                       |
| Manuscript ID                   | bmjopen-2016-013381                                                                                                                                   |
| Article Type:                   | Protocol                                                                                                                                              |
| Date Submitted by the Author:   | 08-Jul-2016                                                                                                                                           |
| Complete List of Authors:       | Owen, Dawn; Bangor University, Psychology<br>Griffith, Nia; Bangor University, Psychology<br>Hutchings, Judy; Bangor University, School of Psychology |
| <b>Primary Subject Heading</b>: | Evidence based practice                                                                                                                               |
| Secondary Subject Heading:      | Public health                                                                                                                                         |
| Keywords:                       | Clinical trials < THERAPEUTICS, STATISTICS & RESEARCH METHODS, Child & adolescent psychiatry < PSYCHIATRY                                             |
|                                 |                                                                                                                                                       |

SCHOLARONE™  
Manuscripts

1  
2  
3 **Title:** Evaluation of an online parenting programme based on ‘The Little Parent Handbook’:  
4  
5 Study protocol for a pilot randomised controlled trial  
6  
7  
8

9  
10 **Authors:** Dawn Adele Owen, Nia Griffith, Judy Hutchings  
11

12  
13  
14 **Author details:**

15  
16 Centre for Evidence Based Early Intervention, School of Psychology, Nantlle Building,  
17  
18 Normal Site, Bangor University, Bangor, Gwynedd, LL57 2PZ, UK (01248 383 758).  
19

20  
21 Email: [dawn.a.owen@bangor.ac.uk](mailto:dawn.a.owen@bangor.ac.uk)  
22

23  
24  
25 School of Psychology, Wheldon Building, Room 113, Bangor University, Bangor, Gwynedd,  
26  
27 LL57 2PZ, UK.  
28

29  
30 Email: [n.griffith@bangor.ac.uk](mailto:n.griffith@bangor.ac.uk)  
31

32  
33  
34 Centre for Evidence Based Early Intervention, School of Psychology, Nantlle Building,  
35  
36 Normal Site, Bangor University, Bangor, Gwynedd, LL57 2PZ, UK.  
37

38  
39 Email: [j.hutchings@bangor.ac.uk](mailto:j.hutchings@bangor.ac.uk)  
40

41  
42  
43 **Keywords:** child behaviour, online parenting programme, randomised controlled trial,  
44  
45 positive parenting, and health care services  
46  
47

48  
49 **Word count:** 5,571  
50  
51  
52  
53  
54  
55  
56  
57  
58  
59  
60

## Abstract

**Introduction:** The online parenting programme based on ‘The Little Parent Handbook’ is a web-based parenting intervention for parents of children aged 3-8 years who would like to learn more about positive parenting. The programme focuses on strengthening parent-child relationships through encouraging positive child behaviour. This trial will evaluate whether the intervention is effective in increasing the use of positive parenting strategies outlined in the programme using both parent report and blind observation.

**Methods and analysis:** This is a pilot randomised controlled trial with intervention and wait-list control conditions. The intervention is a ten-week online parenting programme to promote positive parent-child relations by teaching core social learning theory principles that encourage positive child behaviour, primarily through the use of praise and rewards. Health visitors and school nurses will circulate a recruitment poster to parents of children aged 3-8 years on their current caseloads. Recruitment posters will also be distributed via local primary schools and nurseries. Parents recruited to the trial will be randomised on a 2:1 ratio to intervention or wait-list control conditions (stratified according to child gender and age). The primary outcome measure is positive parenting as measured by a behavioural observation of parent-child interactions using the Dyadic Parent-Child Interaction Coding System [1]. Secondary outcomes include parental report measures of child behaviour, self-reported parental sense of competence, parenting behaviour and parental mental health. Data will be collected at baseline and three months later (post-intervention) for all participants and six months post-baseline for the intervention group only. ANCOVA will be the main statistical method used.

**Ethics and dissemination:** The trial has received ethical approval from the NHS Betsi Cadwaladr University Health Board Ethics Committee (REC) and the School of Psychology,

1  
2  
3 Bangor University REC (15/WA/0463). Publications of all outcomes will be in peer-  
4  
5 reviewed journals and conference presentations.  
6  
7  
8

### 9 10 **Strengths and limitations**

- 11 • This is a randomised Controlled Trial with a wait-list control group.
- 12
- 13 • The behavioural observations incorporate inter-rater reliability (20% of all
- 14 observations at the separate time points).
- 15
- 16 • Once randomised, intervention parents start the online programme immediately thus
- 17 reducing the amount of time spent waiting for the intervention.
- 18
- 19 • A limitation of this study is parents are required to log in each week and engage with
- 20 the programme, this may result in some parents not fully engaging.
- 21
- 22
- 23
- 24
- 25
- 26
- 27
- 28
- 29

## 30 **Background**

### 31 **Importance of positive parenting**

32  
33  
34 Children who are at risk of poor outcomes, including impairments in social, emotional and  
35 educational functioning [2], often experience harsh and inconsistent parenting from parents  
36 who show little positive parental involvement [3]. Problematic parenting strategies can be  
37 addressed through teaching positive parenting skills to target such child behaviour problems  
38 and achieve positive outcomes [4, 5, 6, 7]. These positive parenting skills that are associated  
39 with positive child outcomes are well established and include play, praise, reward, and  
40 positive affect [4].  
41  
42  
43  
44  
45  
46  
47  
48  
49  
50  
51

52  
53  
54 A successful intervention for parents of children with significant behavioural difficulties [6]  
55 used mediator analysis to demonstrate that the mechanism for change in child behaviour was  
56  
57  
58  
59  
60

1  
2  
3 change in parental behaviour [8]. Similarly, teaching positive parental strategies has been  
4  
5 shown to increase positive parenting style as measured by direct observation of parent-child  
6  
7 interactions [9]. Whilst these studies have focused on programmes for parents of children  
8  
9 with, or at risk of, significant problems, there is less evidence for the benefits of parenting  
10  
11 programmes for parents in general.  
12

### 13 14 15 16 **The need for additional parental support**

17  
18 Society is continuously evolving, and although some recent developments have brought  
19  
20 about positive changes (such as advances in medical treatments, improvements in working  
21  
22 conditions and improved communication), others can present challenges, especially for  
23  
24 parents. These can include the challenge of managing children's access to new technological  
25  
26 products such as smartphones and video games [10], which can lead to parent-child conflict.  
27  
28 Children also spend more time in more sedentary activities such as playing video games and  
29  
30 watching television [11] contributing to an epidemic of childhood obesity [12]. Another  
31  
32 challenge arises from parental anxiety concerning children playing outside [13] due to  
33  
34 increased perception of the risk of danger. Other challenges include the impact of divorce and  
35  
36 low socioeconomic status on children's well-being and adjustment [3] as poverty and other  
37  
38 disadvantaging circumstances can affect parenting [14].  
39  
40  
41  
42  
43  
44

45  
46 Children spend increasing amounts of time, between 2-5 hours a day, watching television and  
47  
48 for young children this is negatively associated with time spent in creative play [15]. Parents  
49  
50 can find it difficult to manage children's access to technology, especially when it is in their  
51  
52 bedrooms leading to other difficulties. A survey of 200 parents of children aged 2-13 years  
53  
54 found that 67% of children had a television in their bedroom, which was associated with  
55  
56 sleep disturbance [16]. Over the past 100 years, there has been a rapid decline in sleep  
57  
58  
59  
60

1  
2  
3 duration in children and adolescents, on average 0.75 minutes per year [17]. The main reason  
4 given by parents for allowing children to have a television in their bedroom was so that adults  
5 themselves could watch their own programmes [16]. This results in parents spending less  
6 time in the company of their children. This is also true of meal times, with, approximately  
7 one third of children younger than six years eating their meals in front of the television  
8 reducing opportunities for mealtime social conversation and the development of language  
9 skills [18].  
10  
11  
12  
13  
14  
15  
16  
17  
18  
19

### 20 **Cost implications and service burden associated with problematic child behaviour**

21  
22 Minor child problem behaviours can develop into more significant problems unless addressed  
23 while children are still young [19] and there are high costs associated with child mental  
24 health and behavioural problems [20]. Conduct problems have a significant impact on  
25 children's functioning and quality of life [21] with up to 50% of children and young people  
26 with conduct disorder developing antisocial personality disorder [22, 21]. This highlights the  
27 importance of providing early universal support to parents to avoid the small behavioural  
28 challenges faced by all parents from progressing into more costly ones.  
29  
30  
31  
32  
33  
34  
35  
36  
37  
38  
39

40 Although, in the UK, there are both universal and targeted services to support families, only  
41 20% of children with mental health difficulties receive specialist child and adolescent mental  
42 health services [23]. The majority of families with children at significant risk of poor  
43 outcomes are supported by health visitors and school nurses reducing their ability to provide  
44 adequate support to all families. A survey of health visitors and school nurses reported that  
45 53% of health visitors saw between 21-50, and 46% of school nurses saw between 50-99  
46 children with emotional or behavioural problems each week [24]. Public policy recognises  
47  
48  
49  
50  
51  
52  
53  
54  
55  
56  
57  
58  
59  
60

1  
2  
3 the need for early intervention and support for families, but it is not universally available and  
4  
5 remains “patchy” [25].  
6  
7

### 8 9 **Limitations of group-based and one-to-one parenting interventions**

10  
11 There is strong empirical evidence for the effectiveness of group based preventative  
12  
13 behavioural interventions targeting parents of young children at risk of poor outcomes [26,  
14  
15 27, 6, 5, 8]. However, although positive outcomes have been achieved [28], these  
16  
17 programmes are not universally available or, when they exist, may not be accessible to some  
18  
19 families, especially those living in more rural areas [29] or in poverty [30, 31], for example,  
20  
21 the inconvenience of travel to the clinical setting or organising childcare arrangements for  
22  
23 groups scheduled during weekday hours can be particularly burdensome [32].  
24  
25  
26  
27

28  
29 One-to-one parenting interventions have shown good outcomes. Lane and Hutchings [33]  
30  
31 recruited health visitors to take part in a 12-session course in behavioural intervention for  
32  
33 work with children with behavioural difficulties; each health visitor identified one family to  
34  
35 work with. Health visitors demonstrated a significant increase in knowledge of behavioural  
36  
37 terminology and reported increased use of the behavioural techniques following the course.  
38  
39 Significant improvements for families were also found on measures of child behaviour and  
40  
41 maternal mental health [33]. The ‘Family Check-up’ intervention [34] has also demonstrated  
42  
43 good outcomes. The programme involves two or three home visit consultation sessions with  
44  
45 the aim of providing more intensive and structured parenting support to those families found  
46  
47 to need it. The family-centred intervention significantly predicted improvements in positive  
48  
49 behaviour support at child ages 2-3 [34]. However, home-visiting interventions tend to be  
50  
51 targeted and can be costly. The mean cost per infant in a trial of the ‘Family Nurse  
52  
53 Partnership’, which targeted vulnerable families totalled £7120 [35]. Similarly, a cost  
54  
55  
56  
57  
58  
59  
60

1  
2  
3 effective analysis of the Incredible Years basic parenting programme showed that the  
4  
5 intervention improved children's behaviour at a cost of £1344 per child [36].  
6  
7

8  
9 A review of parental and professional perceptions of barriers to parenting interventions [29]  
10  
11 highlighted five challenges for both parents and facilitators; (1) situational barriers, (2)  
12  
13 psychological barriers including fear of being criticised or stigmatised [37], (3) lack of  
14  
15 information/misconception about services, (4) availability of services and (5) poor  
16  
17 interagency collaboration. These barriers suggest there could be benefits from alternative  
18  
19 modes of programme delivery including behavioural interventions delivered online [38].  
20  
21  
22  
23

### 24 25 **Potential benefits of web-based parenting interventions**

26  
27 Technology has the potential to enhance parental engagement, teach key parenting skills,  
28  
29 reduce the cost burden associated with group and one-to-one interventions, alleviate  
30  
31 pressures on services, particularly those delivered by health visitors and school nurses, and  
32  
33 offer more flexible access [38, 39, 40]. Access to technology is now feasible for many  
34  
35 parents due to increased availability of internet access [41]. The number of households with  
36  
37 computers increased from 8% to 60% between 1984 and 2003 in the US, and in the UK by  
38  
39 2015, 86% of households had internet access [42]. The majority of parents (75%) now use  
40  
41 social media to obtain parent-related information [43] with over eight million people visiting  
42  
43 an online parenting information and advice website every month [44].  
44  
45  
46  
47  
48

49 Although as yet limited in number, web-based programmes for behaviour change (including  
50  
51 weight loss and alcohol reduction) have achieved positive outcomes [45, 46], suggesting that  
52  
53 technology can be an effective means of providing behaviour change advice and support.  
54

55 Similarly, there is evidence demonstrating increased positive parenting following web-based  
56  
57  
58  
59  
60



1  
2  
3 interventions [47, 48]. Parents of children aged between 3-12 years with conduct disorder  
4  
5 who accessed an online parenting programme, reported less use of harsh parenting and more  
6  
7 use of positive praise compared to wait-list control parents [48], and these findings were  
8  
9 maintained at the six-month follow-up. However, evidence in this field is currently limited  
10  
11 and universal programmes need more evidence to demonstrate effectiveness with families  
12  
13 who are not necessarily experiencing significant levels of child problem behaviours. Bayer  
14  
15 and colleagues highlighted the importance of offering parental support universally (1) so as  
16  
17 not to stigmatise at-risk populations and (2) to prevent missing early signs of problems for  
18  
19 families not classified as at-risk [49].  
20  
21  
22  
23  
24

25 Web based interventions allow parents to access support at home at a time most convenient  
26  
27 for their individual family circumstances, eliminating one of the barriers associated with  
28  
29 more traditional intervention approaches. The internet allows access to advice without having  
30  
31 to seek referral or further advice from health care professionals. This could allow  
32  
33 professionals, such as health visitors and school nurses, more time and resources to target  
34  
35 clinical (or identified at-risk) populations with more individualised interventions. Providing  
36  
37 parents access to online advice and support could increase parental understanding of how to  
38  
39 promote positive child development and potentially prevent the development of child  
40  
41 behaviour problems. Providing positive parenting support in general could avoid the  
42  
43 intergenerational transfer of poor parenting practices [25].  
44  
45  
46  
47  
48

## 49 **Rationale**

50  
51 The aim of the web based parenting programme, based on 'The Little Parent Handbook' [50],  
52  
53 is to provide information and activities based on core social learning theory principles  
54  
55 associated with positive parenting practices and good child outcomes to parents of children  
56  
57  
58  
59  
60

1  
2  
3 aged 3-8 years. The study will explore parental satisfaction and engagement with the  
4 programme and whether it is effective in demonstrating increased use of positive parental  
5 practices in parents of children with a wide age range and varying behavioural patterns.  
6  
7  
8

### 9 10 11 **Aims and Objectives**

12 The aim of this trial is to conduct a pilot randomised controlled trial (RCT) on the  
13 effectiveness of an online parenting programme, for parents of children aged 3-8 years who  
14 would like to learn more about positive parenting by comparing outcomes for intervention  
15 and wait-list control groups.  
16  
17  
18  
19  
20  
21  
22  
23

24 The key objectives are to establish whether parents find the programme acceptable; whether  
25 the programmes successfully engages and retains parents; whether the programme produces  
26 statistically significant increases in positive parenting as observed in a parent-child  
27 observation when compared to wait-list control parents; and to determine whether the online  
28 programme produces any changes in secondary outcomes (parent-reported child behaviour,  
29 parent self-reported sense of competence, behaviour and mental health). The study  
30 hypotheses are:  
31  
32  
33  
34  
35  
36  
37  
38

- 39 i. the online parenting programme will lead to significant increases in positive  
40 parenting strategies as displayed in the behavioural observation coded using  
41 Dyadic Parent-Child Interaction Coding System [1]  
42  
43  
44  
45
- 46 ii. the online programme will significantly increase positive behaviours and  
47 mental health of parents, including self-reported parenting skills, parental  
48 sense of competence and parental mental health  
49  
50  
51  
52
- 53 iii. the online programme will lead to reduction in parent-reported levels of child  
54 problem behaviour as reported using the Eyberg Child Behaviour Inventory  
55  
56  
57  
58 [51]  
59  
60

## Methods/Design

### Trial design

This pilot RCT will explore the effectiveness of an online parenting programme. Parents of children aged 3-8 years who would like to learn more about positive parenting will be randomly allocated to the intervention condition with immediate access to the programme or to a 3-month wait-list control group on a 2:1 ratio.

### Setting

Self-report and observational data will be collected in parents' homes during home visits and parents will access the programme at home. The programme encourages parents to practice the behavioural skills covered in the programme at home with their child.

### Participants

Parents of children aged 3-8 years who would like to learn more about positive parenting, in particular how to encourage positive child behaviour through praise and reward, are invited to participate in the study.

### Eligibility Criteria

#### Inclusion criteria.

To be eligible for the study parents must have a child aged between 3-8 years, be able to understand English (as the programme is only currently available in English) and be able to access the internet on a PC, laptop, iPad or tablet. The software does not yet support smartphones.

**Exclusion criteria.**

Parent does not have a child aged between 3-8 years, does not understand English and does not have access to the internet.

**Recruitment**

Health visitors and school nurses in Gwynedd and Anglesey (North-West Wales) will approach parents of children aged 3-8 years on their own caseloads and describe the online programme and the research trial. If parents decide that they might want to sign up for the study, they will be asked by the health visitor/school nurse to complete a note of interest form, that will be sent to the research office at Bangor University, giving consent for a member of the research team to contact the parent.

On receipt of the note of interest form, a member of the research team will contact the parent to arrange a convenient time to visit and discuss the project further. The researcher will go through the information sheet with the parent during this home visit and ensure that any questions are answered. If the parent is happy to continue, the researcher will obtain informed consent from the parent to participate in the study. Only when consent has been obtained will the researcher proceed to ask the parent to fill out the self-report measures and take part in a 30-minute behavioural observation of parent-child interaction.

In addition to health visitors and school nurses approaching parents on their caseloads, recruitment posters will be distributed in primary schools and nurseries in Gwynedd, Anglesey, Conwy and Denbighshire. An e-mail address and a contact telephone number will be provided on the recruitment poster so that interested parents can contact the research team

1  
2  
3 directly. Parents will either be sent a detailed information sheet via e-mail or the researcher  
4  
5 will discuss the research in depth over the telephone. If parents would still like to participate,  
6  
7 arrangements will then be made for a home visit to discuss the study further. Similarly,  
8  
9 parents who hear about the study through word of mouth can contact the research team for  
10  
11 further information regarding the trial.  
12  
13

## 14 15 16 **Intervention**

### 17 18 **Origins of ‘The Little Parent Handbook’**

19  
20 Trials conducted by Hutchings and colleagues during the 1990s [31, 52] with parents and  
21  
22 health visitors demonstrated positive outcomes from teaching effective behavioural strategies  
23  
24 to parents of children with challenging behavior for both clinically referred and pre-school  
25  
26 prevention populations. Significant overall improvements were found for intervention  
27  
28 families on measures of child behaviour, parenting practices and maternal mental health [31]  
29  
30 [33]. As part of these trials intervention parents were provided with help sheets that were  
31  
32 subsequently published as ‘The Little Parent Handbook’ [50]. These trials were multi-  
33  
34 component trials and so it is difficult to establish the true extent of the effectiveness of the  
35  
36 parent help-sheets, however they contained the evidence based behavioural principles on  
37  
38 which the interventions were based.  
39  
40  
41  
42  
43  
44

### 45 46 **LifeGuide online behaviour change software**

47  
48 The LifeGuide software, developed at the University of Southampton [53], was used in the  
49  
50 creation of the online parenting programme. The aim of LifeGuide is to continuously  
51  
52 develop, evaluate and disseminate a set of tools that will allow researchers to flexibly create  
53  
54 and modify online behaviour change interventions [54]. LifeGuide software allows  
55  
56  
57  
58  
59  
60

1  
2  
3 researchers to deliver behavioural principles both through programme delivery (text message  
4 prompts etc.) and programme content (The Little Parent Handbook).  
5  
6  
7

8  
9  
10 Features of the online parenting programme include automated feedback based on individual  
11 performance, online praise messages for spending time with their child, text message  
12 reminders to access the next session, and multiple-choice quizzes to test knowledge. The  
13 programme also enables the collection of individual usage data (which can be extracted into  
14 Microsoft Excel).  
15  
16  
17  
18  
19

### 20 21 22 23 **The Little Parent Handbook Online Programme**

24  
25 The programme introduces evidence-based behavioural principles that have been shown to be  
26 effective in strengthening parent-child relations through encouraging positive child behaviour  
27 [55]. A feasibility study of the online parenting programme at the end of 2015 provided user  
28 feedback prior to conducting this larger-scale RCT trial. Overall, feedback was very positive  
29 with the majority of participants reporting that they would recommend the programme to  
30 parents of children aged 3-8 years. Minor modifications were made based on the feedback,  
31 these include text message prompting parents to log-in to subsequent sessions, more video  
32 examples of positive parenting and the option to look back over previously completed  
33 chapters again. The intervention consists of ten chapters, eight content and two revision  
34 chapters. The topics are:  
35  
36  
37  
38  
39  
40  
41  
42  
43  
44  
45  
46

- 47 i. Spending special time with your child through play
  - 48 ii. Encouraging good behaviour through praising
  - 49 iii. Encouraging good behaviour through rewarding
  - 50 iv. How to get better at giving instructions [part 1]
  - 51 v. How to get better at giving instructions [part 2]
- 52  
53  
54  
55  
56  
57  
58  
59  
60

- vi. Revision
- vii. Ignoring problem behaviour
- viii. Teaching your child new behaviours
- ix. How to develop your child's language skills
- x. Revision

Intervention parents will be provided with a link to the website and a username and password. Contact details of an administrator will be provided in case any parent requires technical support during the programme. Parents will be asked to log in and complete one chapter each week, each chapter will take approximately thirty minutes to complete. The software ensures that parents have completed each chapter before they can move on to the next one; they are not required to complete the chapter in one sitting. Log in details allow parents to access the programme as many times as they wish. The intervention has been programmed to take parents to the last page that they viewed on the next occasion that they log in to avoid parents having to start the programme from the beginning. In order to give parents sufficient time to practice the principles outlined in the individual chapters, the intervention has been programmed so that there will be a minimum five-day gap between each chapter. If parents log in before the five days have elapsed, they will be offered the opportunity to look back over previously completed chapters again.

The programme asks parents to practice the skills presented in the chapter with their child at home. Each chapter concludes with a suggested practice activity. Parents are also encouraged to keep paper records detailing their activities (a research team member will collect all paper copies at the end of the intervention). Parents can also record online each week how many times they have played with their child by selecting the amount of times from a drop-down menu. The programme encourages parents to spend more time playing with their child in

1  
2  
3 order to strengthen their relationship, and they are continuously reminded to engage in this  
4  
5 activity throughout the programme both by praise messages and by being prompted to record  
6  
7 the amount of time spent playing. A praise message congratulates the parent for spending  
8  
9 time with their child if they report spending time with their child during the past week, or  
10  
11 since the last time they logged in. If parents do not report having spent time with their child  
12  
13 during the past week, a prompt message appears reminding them of the importance of this  
14  
15 activity.  
16  
17

18  
19  
20 Each chapter covers an individual behavioural principle that aims to strengthen the parent-  
21  
22 child relationship. Parents read through information (or listen via an audio button if they  
23  
24 prefer) and watch video examples of positive parenting. The video clips are short in length  
25  
26 (all are less than one minute long) allowing the opportunity for multiple viewing. At the end  
27  
28 of each chapter there is a longer video and parents are asked to answer three questions based  
29  
30 on the video clip (by selecting yes or no) in order to develop their observational skills and to  
31  
32 encourage them to identify positive child behaviours. For example, at the end of chapter two  
33  
34 (praising positive behaviour) parents are prompted to watch a video of a parent giving her  
35  
36 child a specific labelled praise, and then answering three questions based on the video; (1)  
37  
38 Did the parent praise the child immediately? (2) Was the parent close to the child when  
39  
40 praising? (3) Did the parent share positive feelings when praising? A score out of three and  
41  
42 the correct answers are provided for the responses to the videos.  
43  
44  
45  
46  
47  
48

49 Each chapter ends with a multiple-choice quiz to test parents' knowledge and understanding  
50  
51 of key principles. Parents will be given online automated feedback on their quiz scores in  
52  
53 addition to the correct answers. Parents also have an option to download and print a summary  
54  
55 sheet for each chapter.  
56  
57  
58  
59  
60



1  
2  
3  
4  
5 Parents will be given an opportunity to receive text message prompts to help keep them on  
6  
7 track. If they would like to receive text messages, they will be asked at the beginning of the  
8  
9 programme to enter their mobile phone number. The programme is fully automated, and the  
10  
11 research team will have no contact with parents during the intervention. The centre  
12  
13 administrator can be contacted if parents require any technical assistance during the study. A  
14  
15 text message will be sent five days after the completion of a chapter informing the parent that  
16  
17 the next chapter is now available. If the parent has not logged into the programme to  
18  
19 complete the next chapter three days after it becomes available, a reminder text will be sent  
20  
21 prompting them to log in and complete the next chapter. If a parent still has not logged in,  
22  
23 weekly reminders will be sent.  
24  
25  
26  
27  
28

29  
30 Baseline data will be collected prior to randomisation and, once it is completed, intervention  
31  
32 parents will receive a notification of their status and their log in details, whilst parents in the  
33  
34 wait-list control group will be informed that they will have access to the programme after  
35  
36 three months. Follow up data will be collected after three months regardless of whether  
37  
38 intervention parents have completed the programme. Once post-intervention data has been  
39  
40 collected, control group parents will receive their log in details for the programme. On  
41  
42 completion of both baseline and follow-up visits, families will receive a children's book as a  
43  
44 thank you for their time. On completion of all measures, all parents will receive a copy of  
45  
46 'The Little Parent Handbook'. Data collection will begin in April 2016 and end in February  
47  
48 2017.  
49  
50  
51  
52  
53

## 54 **Study Outcomes**

### 55 **Primary outcome.**

56  
57  
58  
59  
60

1  
2  
3 The primary outcome is to establish whether the online parenting programme produces  
4 significant changes in positive parenting practices from baseline to follow-up as recorded  
5 using the DPICS. The researcher will observe the parent and child engaging in child-led play  
6 for thirty minutes. This coding system was specifically designed to assess the quality of  
7 parent-child social interaction [56]. The DPICS has demonstrated high inter-rater reliability  
8 for parent and child behaviours,  $r = 0.67$  to  $1.0$  and  $r = 0.76$  to  $1.0$  respectively [56]. Direct  
9 observation was selected as the primary outcome as direct observational methods provide a  
10 more precise account of behaviour defined by the researcher and not the parent [57].  
11  
12 Additionally, this observational measure has been used in a number of previous studies at the  
13 centre [6, 52, 58].  
14  
15  
16  
17  
18  
19  
20  
21  
22  
23  
24  
25  
26  
27

28 There are eight DPICS parent categories summarised in terms of positive and negative  
29 parenting. Positive parenting categories comprise of direct command, labelled praise,  
30 unlabelled praise and descriptive commenting/verbal labelling. Negative parenting categories  
31 comprise of indirect command, questions, critical statement and negative command. No child  
32 categories will be recorded, as child behaviour will be measured using the parent report  
33 ECBI. Observational coding is continuous and records the total frequency of each category of  
34 parent behaviour for a total of thirty minutes. Inter-rater levels of reliability will be assessed  
35 for 20% of all observations at all three-time points.  
36  
37  
38  
39  
40  
41  
42  
43  
44  
45  
46  
47

### 48 **Secondary outcomes.**

49 The following secondary outcomes will be collected at the three time points by the research  
50 team for the intervention group and twice for the wait-list control group.  
51

- 52 • Child behaviour as measured by the Eyberg Child Behaviour Inventory [1]. This  
53 measure is a 36-item inventory completed by the parent to assess the frequency and  
54  
55  
56  
57  
58  
59  
60

1  
2  
3 intensity of child behavioural problems for children aged 2-16 years, and has been  
4  
5 used in many previous trials including several that have been conducted at the centre  
6  
7 [6] [31]. Factor analyses of the ECBI for both children and adolescents indicate that it  
8  
9 is a uni-dimensional measure of conduct problem behaviours [51].  
10

- 11 • Parenting practices as measured by the Arnold O’Leary Parenting Scale [59]. This is a  
12  
13 30-item inventory with three subscales measuring parental behaviour: laxness, over-  
14  
15 reactivity and verbosity. Responses are recorded on a seven-point scale with two  
16  
17 alternative responses to a particular parental situation. The parenting scale has been  
18  
19 shown to exhibit adequate internal validity and test-retest reliability [59] in addition to  
20  
21 demonstrating significant correlations with observational measures of child problem  
22  
23 behaviour [59].  
24  
25
- 26 • Parental confidence as measured by the Parental Sense of Competence questionnaire  
27  
28 [60]. This 17-item likert-scale questionnaire measures competence on two separate  
29  
30 dimensions: satisfaction and efficacy. The satisfaction questions measure parental  
31  
32 anxiety, motivation and frustration (for example, ‘sometimes I feel like I’m not  
33  
34 getting anything done’) and the efficacy question examine competence, capability  
35  
36 levels and problem-solving skills (for example, ‘I meet my own personal expectations  
37  
38 for expertise in caring for my child’) in relation to parenting [60]. Ohan, Leung and  
39  
40 Johnston [61] replicated the factor structure of the Parenting Sense of Competence  
41  
42 Scale produced by Johnston and Mash [60], and provided evidence that the  
43  
44 satisfaction and efficacy scales from this measure assess distinct aspects of parenting  
45  
46 self-esteem.  
47  
48
- 49 • Parental mental health as measured by the General Health Questionnaire [62]. This is  
50  
51 a 30-item questionnaire and each item invites one of four responses in order to assess  
52  
53 psychiatric symptoms including social dysfunction, sleeping patterns and depression  
54  
55  
56  
57  
58  
59  
60

1  
2  
3 [63]. The responses include 'better than usual', 'same as usual', 'less than usual' and  
4  
5 'much less than usual' to questions such as 'have you found everything getting on top  
6  
7 of you?' and 'have you been getting edgy and bad tempered?' This measure was used  
8  
9 as research has demonstrated the association between maternal mental health and  
10  
11 child conduct problems [64]. Reliability coefficients of the questionnaire have ranged  
12  
13 from 0.78 to 0.95 in various studies [65]. There have been several factor analyses of  
14  
15 the GHQ-30 in relatively large community samples [63].  
16  
17  
18  
19

### 20 21 **Demographic information**

22 Demographic information will be collected from all participants at baseline prior to  
23  
24 randomisation. The demographic questionnaire is based on the 'Personal Development  
25  
26 and Health Questionnaire' [30] and will include data on socioeconomic status, including  
27  
28 poverty, parental educational level and single-parent status. The questionnaire will cover  
29  
30 the following information:  
31  
32  
33  
34  
35

- 36 • Age of parent and child, gender of parent and child, child diagnosis, parent's  
37  
38 relationship to the child (biological or non-biological parent), parent's age at birth of  
39  
40 first child, how many children the parent has, ages of all children, parent's current  
41  
42 relationship status, partner's relationship to the child, housing situation, employment  
43  
44 status, income, parent's level of education and whether they have previously attended  
45  
46 a parenting course. An additional question regarding their internet usage is also  
47  
48 included.  
49  
50  
51  
52

### 53 54 **Mediators**

1  
2  
3 Potential mediators of change in child behaviour will be explored to establish whether any  
4  
5 changes in parenting behaviour are associated with changes in child behaviour using the  
6  
7 parent report of child behaviour as measured by the ECBI as the outcome of interest.  
8

9  
10 Potential mediators of change in parenting behaviour will be explored using the DPICS  
11  
12 observation instrument and the Arnold O’Leary parenting scale, mental health questionnaire  
13  
14 and parent sense of competence questionnaire.  
15

### 16 17 18 **Moderators**

19  
20 Potential moderators, or an analysis of for whom the intervention worked best, will be  
21  
22 explored using data from the demographic questionnaire. These will include poverty,  
23  
24 unemployment, housing situation, and single parent status, level of parental education and  
25  
26 level of child behaviour problems as reported by the ECBI. Child age and gender are also  
27  
28 potential moderators.  
29  
30  
31

### 32 33 34 **Data Collection**

35  
36 Members of the research team will collect parental self-report measures and observational  
37  
38 data on parent-child interaction using the DPICS behaviour coding system, during home  
39  
40 visits. Parents will also be asked to complete a short feedback/satisfaction questionnaire at  
41  
42 the end of the study to share their views of the programme.  
43  
44  
45

46  
47 The DPICS has been used in a number of studies evaluating parenting programmes [6, 59,  
48  
49 65]. Research team members are already trained in DPICS coding and have reached 80%  
50  
51 inter-rater reliability across all categories. At least two coders, to establish inter-rater  
52  
53 reliability, will code 20% of observations at each time-point simultaneously (baseline and  
54  
55 follow-up). Frequent practice sessions and meetings will be held to discuss any matters  
56  
57  
58  
59  
60

1  
2  
3 arising and to ensure maintenance of a minimum level of 80% reliability.  
4  
5  
6

### 7 8 **Sample Size**

9  
10 The intention is to recruit 60 parents (40 to intervention and 20 to wait-list control,  
11 randomised on a 2:1 ratio). Due to limited funds and time restrictions associated with  
12 recruitment and data collection, a larger sample size would be difficult to recruit. This is a  
13 pilot RCT study and is exploratory in nature; and a sample size of 60 parents should be  
14 sufficient to explore initial outcomes in terms of programme acceptability, effectiveness and  
15 encouragement in the use of positive parental strategies.  
16  
17  
18  
19  
20  
21  
22  
23

### 24 25 **Randomisation**

26  
27 Once all of the data for individual parents have been collected at baseline, parents will be  
28 randomised to either the intervention or a wait-list control condition on a 2:1 ratio. This  
29 allows for the evaluation of a larger intervention sample whilst also reducing the number of  
30 parents waiting for the intervention. This design is favoured for research in this field [6]. The  
31 randomisation will be stratified according to child age (3-5 and 6-8 years old) and gender  
32 (male and female) using the online software 'sealed envelope'. The centre administrative  
33 assistant will undertake the randomisation process, which will require entering the participant  
34 identification number, child age and child gender. The software will then generate the  
35 decision on whether the participant has been allocated to the intervention (group 1) or control  
36 (group 2) condition. Parents will receive a letter from the administrator informing them of  
37 their group allocation and intervention parents will receive the link to the website and their  
38 log in details with this letter. Control parents will be informed that they will receive their log  
39 in details upon completion of the second home visit (post-intervention data).  
40  
41  
42  
43  
44  
45  
46  
47  
48  
49  
50  
51  
52  
53  
54  
55  
56  
57  
58  
59  
60

## Blinding

Baseline measures will be completed prior to randomisation and parents will be asked (during home visits) not to reveal their group allocation to researchers in order, as far as possible, to keep the researchers blind to parent group allocation. However, some parents may reveal their allocation during the first follow-up home visits. In this instance, researchers will make a record of this. Due to the design of the study, it will not be possible to keep the researchers blind to group allocation at the second six-month follow-up stage as they will only involve intervention parents. However the key measures are parent report questionnaires and the frequency based behavioural observation that incorporates inter-rater reliability. If high levels of unmasking occur, a variable will be added to the analysis to control for this.

## Statistical Analysis

Baseline characteristics for all parents and children will be analysed and checked for differences (if any) between the intervention and wait-list control groups. Any differences will be recorded and accounted for in the analysis. ANCOVA will be used as the main analysis method to compare the intervention and wait-list control groups. A regression analysis will be used to analyse potential effects of mediator and moderator effects. Missing data will be treated using appropriate statistical methods e.g. multiple imputation.

## Discussion

This trial will provide information on the effectiveness of an online parenting programme, an intervention designed to increase positive parenting for parents of children aged 3-8 years. The effects of the intervention on child behaviour, parenting behaviour, parental mental health and parental sense of competence will also be assessed. This project is timely when considering the current situation with regards to rising numbers of children displaying

1  
2  
3 behaviour problems [21], the increasing challenges faced by parents [10] and the known  
4  
5 impact of parenting style on the establishment and maintenance child behaviour problems  
6  
7 [65, 8, 50]. Additionally, this online programme targets intervention barriers, as parents can  
8  
9 complete the web-based programme at home at a convenient time without relying on referrals  
10  
11 from professionals.  
12

13  
14  
15  
16 This intervention has the potential to be a cost-effective early intervention prevention  
17  
18 resource both for parents for whom no support would otherwise be available and/or as an  
19  
20 alternative cost effective resource for use by the health care services [67]. An evidence-based  
21  
22 online intervention could allow professionals to spend more time and resources supporting  
23  
24 families with more significant problems, by enabling parents who require general parenting  
25  
26 support to access a web-based programme. This could potentially reduce the number of  
27  
28 families seeking advice for whom no service currently exists [32].  
29  
30  
31  
32  
33

### 34 **Proposed results**

35  
36 This evaluation of a web version of a parenting programme based on ‘The Little Parent  
37  
38 Handbook’, which itself includes material developed as part of an evidence-based  
39  
40 intervention, should be a useful addition to the parenting literature. If significant benefits are  
41  
42 found, the intervention could be made available for health visitors and school nurses to  
43  
44 distribute to parents on a regular basis. It is hypothesised that the online programme will  
45  
46 encourage parents to use positive parenting strategies, including spending more time with  
47  
48 their child and praising and rewarding positive child behaviour. Additionally, it is  
49  
50 hypothesised that the online programme will improve a range of outcomes including self-  
51  
52 reported parenting practices, parental mental health, parental confidence and child behaviour.  
53  
54  
55  
56  
57  
58  
59  
60



1  
2  
3 **Trial registration:** Current Controlled Trials ISRCTN89370147 (May 5<sup>th</sup> 2016).  
4

5 **Trial status**  
6

7 The trial is currently on going. Baseline measures commenced in April 2016 and 3-month  
8 follow-up are commencing in July 2016.  
9  
10

11  
12  
13 **Abbreviations**  
14

15 NICE: The National Institute for Health and Care Excellence; ONS: Office for National  
16 Statistics, ANCOVA; Analysis of Covariance; REC: Research Ethics Committee  
17  
18  
19

20  
21  
22 **Author's contributions**  
23

24 DAO: designing of the online programme, manuscript writing, gaining ethical approval, data  
25 collection, data analysis, critical revision and final approval of manuscript. NG: critical  
26 revision and final approval of manuscript. JH: author of 'The Little Parent Handbook',  
27 critical revision and final approval of manuscript.  
28  
29  
30  
31  
32

33  
34  
35 **Competing interests:** The third author [JH] is the author of 'The Little Parent Handbook'.  
36  
37  
38

39  
40 **Acknowledgement and funding**  
41

42 A Bangor University Alumna member who wishes to remain anonymous has funded this  
43 trial.  
44  
45  
46  
47  
48  
49  
50  
51  
52  
53  
54  
55  
56  
57  
58  
59  
60

## References

1. Eyberg S, & Robison E. Dyadic Parent-Child Interaction Coding System: A Manual. The Parenting Clinic, University of Washington 1981.
2. Frick P, & Loney B. Outcomes of children and adolescents with oppositional defiant disorder and conduct disorder. In Handbook of disruptive behaviour disorders. Springer US 1999; 507-524.
3. Patterson G, DeBaryshe B, & Ramsey E. A developmental perspective on antisocial behaviour. *American Psychologist* 1990; 44, 329-335.
4. Furlong M, McGilloway S, Bywater T, et al. Cochrane Review: Behavioural and cognitive-behavioural group-based parenting programmes for early-onset conduct problems in children aged 3 to 12 years (Review). *Evidence-Based Child Health: A Cochrane Review Journal* 2012; 8(2), 318-692.
5. Markie-Dadds C, & Sanders M. Self-directed Triple P (positive parenting programme) for mothers with children at-risk of developing conduct problems. *Behavioural and Cognitive Psychotherapy* 2006; 34, 259-275.
6. Hutchings J, Bywater T, Daley D, et al. Parenting intervention in Sue Start services for children at risk of developing conduct disorder: pragmatic randomised controlled trial. *British Medical Journal* 2007; 334(7595), 678.
7. McMahon R, & Forehand R. *Helping the noncompliant child: Family-based treatment for oppositional behaviour*. Guilford Press 2005.
8. Gardner F, Hutchings J, Bywater T, et al. Who benefits and how does it work? Moderators and mediators of outcome in an effectiveness trial of a parenting intervention. *Journal of Clinical Child & Adolescent Psychology* 2010; 39(4), 568-580 2010.
9. Webster-Stratton C, Reid J, & Hammond M. Social skills and problem-solving training for children with early-onset conduct problems: Who benefits? *Journal of Child Psychology and Psychiatry* 2001; 42(7), 943-952.
10. Palmer S. *Toxic Childhood: How the modern world is damaging our children and what we can do about it*. Orion 2006.
11. Clements R. An investigation of the status of outdoor play. *Contemporary issues in early childhood* 2004; 5(1); 68-80
12. Carli M, Argentieri L, Cardone M, et al. Role of television in childhood obesity prevention. *International Journal of Obesity* 2004; 28; S104-S108.
13. Carver A, Timperio A, & Crawford D. Playing it safe: The influence of neighbourhood safety on children's physical activity—A review. *Health & place* 2008; 14(2); 217-227.

14. Bolger K, Patterson J, Thompson W, et al. Psychosocial adjustment among children experiencing persistent and intermittent family economic hardship. *Child Development* 1995; 66(4); 1107-1129.
15. Vandewater E, Bickham D, & Lee J. Time well spent? Relating television use to children's free-time activities. *Pediatrics* 2006; 117(2); e181-e191.
16. Taveras E, Hohman K, Price S, et al. Televisions in the bedrooms of racial/ethnic minority children: how did they get there and how do we get them out? *Clinical Pediatrics* 2009; 48(7); 715-719.
17. Matricciani L, Olds T, & Petkov J. In search of lost sleep: secular trends in the sleep time of school-aged children and adolescents. *Sleep medicine reviews* 2012; 16(3); 203-211.
18. Fitzpatrick E, Edmunds L, & Dennison B. Positive effects of family dinner are undone by television viewing. *Journal of the American Dietetic Association* 2007; 107(4); 666-671.
19. Nixon R. Treatment of behaviour problems in pre-schoolers: A review of parent training programs. *Clinical Psychology Review* 2002; 22; 525-546.
20. Knapp M, McCrone P, Fombonne E, et al. The Maudsley long-term follow-up of child and adolescent depression. *The British Journal of Psychiatry* 2002; 180(1); 19-23.
21. National Institute for Health and Care Excellence. Antisocial behaviour and conduct disorders in children and young people: recognition and management. Retrieved from <https://www.nice.org.uk/guidance/cg158> (Accessed May 2013).
22. Foster E, & Jones D. The high costs of aggression: Public expenditures resulting from conduct disorder. *American Journal of Public Health* 2005; 95(10); 1767-1772.
23. Goodman R, Ford T, Simmons H, et al. Using the Strengths and Difficulties Questionnaire (SDQ) to screen for child psychiatric disorders in a community sample. *The British Journal of Psychiatry* 2000; 177(6); 534-539.
24. Wilson P, Furnivall J, Barbour R, et al. The work of health visitors and school nurses with children with psychological and behavioural problems. *Journal of advanced nursing* 2008; 61(4); 445-455.
25. Allen G. Early Intervention: The next steps. *An independent report to Her Majesty's Government*. The Stationery Office 2011.
26. Webster-Stratton C, & Hammond M. Treating children with early-onset conduct problems: a comparison of child and parent training interventions. *Journal of Consulting and Clinical Psychology* 1997; 65(1); 93.
27. Forehand R, & King E. Noncompliant children: Effects of parent training on behaviour and attitude change. *Behaviour Modification* 1977; 1(1); 93-107.

- 1
- 2
- 3 28. McGilloyway S, Mhaille G, Bywater T, et al. A parenting intervention for childhood
- 4 behaviour problems: A randomised controlled trial in disadvantaged community-
- 5 based settings. *Journal of Consulting and Clinical Psychology* 2012; 80(1); 116-127.
- 6
- 7
- 8 29. Koerting J, Smith E, Knowles M, et al. Barriers to, and facilitators of, parenting
- 9 programmes for childhood behaviour problems: a qualitative synthesis of studies of
- 10 parents' and professionals' perceptions. *European child & adolescent psychiatry*
- 11 2013; 22(11); 653-670.
- 12
- 13 30. Hutchings J. The personal and parental characteristics of preschool children referred
- 14 to a child and family mental health service and their relation to treatment
- 15 outcome (Doctoral dissertation, University of Wales) 1996.
- 16
- 17 31. Hutchings J, Appleton P, Smith M, et al. Evaluation of two treatments for children
- 18 with severe behaviour problems: child behaviour and maternal mental health
- 19 outcomes. *Behavioural and Cognitive Psychotherapy* 2002; 30(03); 279-295.
- 20
- 21 32. Lingley-Pottie P, & McGrath P. Distance therapeutic alliance: the participant's
- 22 experience. *Advances in Nursing Science* 2007; 30(4); 353-366.
- 23
- 24 33. Lane E, & Hutchings J. Benefits of a course in behavioural analysis for health
- 25 visitors. *British Journal of Nursing* 2002; 11(10); 702-714.
- 26
- 27
- 28 34. Dishion T, Shaw D, Connell A, et al. The family check-up with high-risk indigent
- 29 families: Preventing problem behaviour by increasing parents' positive behaviour
- 30 support in early childhood. *Child Development* 2008; 79(5); 1395-1414.
- 31
- 32 35. McIntosh E, Barlow J, Davis H, et al. Economic evaluation of an intensive home
- 33 visiting programme for vulnerable families: a cost-effectiveness analysis of a public
- 34 health intervention. *Journal of Public Health* 2009.
- 35
- 36 36. Edwards R, Céilleachair A, Bywater T, et al. Parenting programme for parents of
- 37 children at risk of developing conduct disorder: cost effectiveness analysis. *BMJ*
- 38 2007; 334(7595); 682.
- 39
- 40 37. Elgar F, & McGrath P. Self-administered psychosocial treatments for children and
- 41 families. *Journal of Clinical Psychology* 2003; 59(3); 321-339.
- 42
- 43 38. Wantland D, Portillo C, Holzemer W, et al. The effectiveness of a web-based versus
- 44 non web-based interventions: A meta-analysis of behavioural change outcomes.
- 45 *Journal of Medical Internet Research* 2004; 6(4).
- 46
- 47 39. Bert S, Farris J, & Borkowski J. Parent training: Implementation strategies for
- 48 adventures in parenting. *The Journal of Primary Prevention* 2008; 29; 243-261.
- 49
- 50 40. Jones D, Forehand R, Cuellar J, et al. Technology-enhanced programme for child
- 51 disruptive development and pilot randomized control trial. *Journal of Clinical Child*
- 52 *and Adolescent Psychology* 2014; 43(1); 88-101.
- 53
- 54
- 55
- 56
- 57
- 58
- 59
- 60

- 1  
2  
3 41. Office for National Statistics. Statistical Bulletin. Internet Access – Households and  
4 Individuals. London: Office for National Statistics 2013.  
5  
6 42. Office for National Statistics. Statistical Bulletin .Internet access- households and  
7 individuals 2015. London: Office for National Statistics 2015.  
8  
9 43. Duggan M, & Lenhart A. Parents and social media. Pew Research Centre, retrieved  
10 from <http://www.pewinternet.org/2015/07/16/parents-and-social-media/> (accessed  
11 May 2015).  
12  
13 44. Netmums. Retrieved from <https://netmums.com/home/about-us> (accessed June 6th  
14 2016).  
15  
16 45. Gold B, Burke S, Pintauro S, et al. Weight loss on the web: A pilot study comparing a  
17 structured behavioural intervention to a commercial programme. *Obesity* 2006; 15(1);  
18 155-164.  
19  
20 46. Linke S, Browne A, & Wallace P. Down your Drink: A web-based intervention for  
21 people with excessive alcohol consumption. *Alcohol and Alcoholism* 2004; 3(91); 29-  
22 32.  
23  
24 47. Baggett K, Davis B, Feil E, et al. Technologies for expanding the research of  
25 evidence-based interventions: Preliminary results for promoting social-emotional  
26 development in early childhood. *Topics in Early Childhood Special Education* 2010.  
27 doi: 10.1177/0271121409354782  
28  
29 48. Enebrink P, Högström J, Forster M, et al. Internet-based parent management training:  
30 A randomised controlled study. *Behaviour research and Therapy* 2012; 50(4); 240-  
31 249.  
32  
33 49. Bayer J, Hiscock H, Morton-Allen E, et al. Prevention of mental health problems:  
34 rationale for a universal approach. *Archives of disease in childhood* 2007; 92(1); 34-  
35 38.  
36  
37 50. Hutchings J. The Little Parent Handbook. *Children's Early Intervention Trust;*  
38 *Bangor* 2013.  
39  
40 51. Eyberg S, & Robison E. Conduct problem behaviour: Standardisation of behavioural  
41 rating. *Journal of Clinical Child and Adolescent Psychology*, 1983; 12(3); 347-354.  
42  
43 52. Hutchings J, Lane E, & Kelly J. Comparison of two treatments for children with  
44 severely disruptive behaviours: A four-year follow-up. *Behaviour and Cognitive*  
45 *Psychotherapy* 2004; 32; 15-30.  
46  
47 53. Yardley L, Osmond A, Hare J, et al. Introduction to the LifeGuide: software  
48 facilitating the development of interactive behaviour change internet interventions.  
49 *Persuasive technology and digital behaviour intervention symposium*; Edinburgh: GB  
50 2009.  
51  
52  
53  
54  
55  
56  
57  
58  
59  
60

- 1  
2  
3 54. Hare J, Osmond A, Yang Y, et al. LifeGuide: A platform for performing web-based  
4 behavioural interventions, *Web-Science: Society On-Line* 2009; 18-20.  
5  
6 55. Cooper J, Heron T, & Heward W. Applied Behaviour Analysis (2<sup>nd</sup> ed.). *Upper*  
7 *Saddle River: NJ* 2007.  
8  
9 56. Robinson E, & Eyberg S. The dyadic parent-child interaction coding system:  
10 Standardization and validation. *Journal of Consulting and Clinical Psychology*  
11 1981; 49(2); 245.  
12  
13 57. Aspland H, & Gardner F. Observational measures of parent-child interaction: An  
14 introductory review. *Child and Adolescent Mental Health* 2003; 8(3); 136-143.  
15  
16 58. Eames C, Daley D, Hutchings J. et al. C. The impact of group leaders' behaviour on  
17 parents acquisition of key parenting skills during parent training. *Behaviour Research*  
18 *and Therapy* 2012; 48(12); 1221-1226.  
19  
20 59. Arnold D, O'Leary S, Wolff L, et al. The Parenting Scale: A measure of  
21 dysfunctional parenting in discipline situations. *Psychological Assessment* 1993; 5(2);  
22 137-144.  
23  
24 60. Johnston C, & Mash E. A measure of parental satisfaction and efficacy. *Journal of*  
25 *Clinical Child Psychology* 1981; 18(2); 167-175.  
26  
27 61. Ohan J, Leung D, & Johnston C. The Parenting Sense of Competence scale: Evidence  
28 of a stable factor structure and validity. *Canadian Journal of Behavioural* 2000;  
29 32(4); 251.  
30  
31 62. Goldberg D. Manual of the General Health Questionnaire. Windsor: England 1978.  
32  
33 63. Huppert F, Walters D, Day N, et al. The factor structure of the General Health  
34 Questionnaire (GHQ-30). A reliability study on 6317 community residents. *The*  
35 *British Journal of Psychiatry* 1989; 155(2); 178-185.  
36  
37 64. Jackson C. The general health questionnaire. *Occupational medicine* 2007; 57(1); 79.  
38  
39 65. Hutchings J, Bywater T, Williams M, et al. Improvements in maternal depression as  
40 a mediator of child behaviour change. *Psychology* 2012; 3(09); 795.  
41  
42 66. Taplin P, & Reid J. Changes in parent consequences as a function of family  
43 intervention. *Journal of Consulting and Clinical Psychology* 1977; 45(6); 973-981.  
44  
45 67. Ary D, Glang A, & Irvine B. The benefits, science and persuasive technology of  
46 successful eHealth behavioural interventions: Effective use of evidence-based  
47 scientific techniques to change health behaviour. ORCAS 2012.  
48  
49  
50  
51  
52  
53  
54  
55  
56  
57  
58  
59  
60



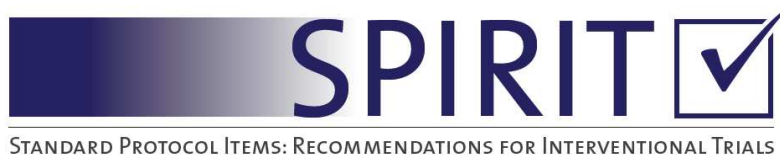

SPIRIT 2013 Checklist: Recommended items to address in a clinical trial protocol and related documents\*

| Section/item                      | Item No | Description                                                                                                                                                                                                                                                                                                       |
|-----------------------------------|---------|-------------------------------------------------------------------------------------------------------------------------------------------------------------------------------------------------------------------------------------------------------------------------------------------------------------------|
| <b>Administrative information</b> |         |                                                                                                                                                                                                                                                                                                                   |
| Title                             | 1       | Descriptive title identifying the study design, population, interventions, and, if applicable, trial acronym <input type="checkbox"/>                                                                                                                                                                             |
| Trial registration                | 2a      | Trial identifier and registry name. If not yet registered, name of intended registry <input type="checkbox"/>                                                                                                                                                                                                     |
|                                   | 2b      | All items from the World Health Organization Trial Registration Data Set                                                                                                                                                                                                                                          |
| Protocol version                  | 3       | Date and version identifier                                                                                                                                                                                                                                                                                       |
| Funding                           | 4       | Sources and types of financial, material, and other support <input type="checkbox"/>                                                                                                                                                                                                                              |
| Roles and responsibilities        | 5a      | Names, affiliations, and roles of protocol contributors <input type="checkbox"/>                                                                                                                                                                                                                                  |
|                                   | 5b      | Name and contact information for the trial sponsor <input type="checkbox"/>                                                                                                                                                                                                                                       |
|                                   | 5c      | Role of study sponsor and funders, if any, in study design; collection, management, analysis, and interpretation of data; writing of the report; and the decision to submit the report for publication, including whether they will have ultimate authority over any of these activities <input type="checkbox"/> |
|                                   | 5d      | Composition, roles, and responsibilities of the coordinating centre, steering committee, endpoint adjudication committee, data management team, and other individuals or groups overseeing the trial, if applicable (see Item 21a for data monitoring committee)                                                  |
| <b>Introduction</b>               |         |                                                                                                                                                                                                                                                                                                                   |
| Background and rationale          | 6a      | Description of research question and justification for undertaking the trial, including summary of relevant studies (published and unpublished) examining benefits and harms for each intervention <input type="checkbox"/>                                                                                       |
|                                   | 6b      | Explanation for choice of comparators <input type="checkbox"/>                                                                                                                                                                                                                                                    |
| Objectives                        | 7       | Specific objectives or hypotheses <input type="checkbox"/>                                                                                                                                                                                                                                                        |
| Trial design                      | 8       | Description of trial design including type of trial (eg, parallel group, crossover, factorial, single group), allocation ratio, and framework (eg, superiority, equivalence, noninferiority, exploratory) <input type="checkbox"/>                                                                                |

**Methods: Participants, interventions, and outcomes**

|                      |     |                                                                                                                                                                                                                                                                                                                                                                                  |
|----------------------|-----|----------------------------------------------------------------------------------------------------------------------------------------------------------------------------------------------------------------------------------------------------------------------------------------------------------------------------------------------------------------------------------|
| Study setting        | 9   | Description of study settings (eg, community clinic, academic hospital) and list of countries where data will be collected. Reference to where list of study sites can be obtained □                                                                                                                                                                                             |
| Eligibility criteria | 10  | Inclusion and exclusion criteria for participants. If applicable, eligibility criteria for study centres and individuals who will perform the interventions (eg, surgeons, psychotherapists) □                                                                                                                                                                                   |
| Interventions        | 11a | Interventions for each group with sufficient detail to allow replication, including how and when they will be administered □                                                                                                                                                                                                                                                     |
|                      | 11b | Criteria for discontinuing or modifying allocated interventions for a given trial participant (eg, drug dose change in response to harms, participant request, or improving/worsening disease) <b>N/A</b>                                                                                                                                                                        |
|                      | 11c | Strategies to improve adherence to intervention protocols, and any procedures for monitoring adherence (eg, drug tablet return, laboratory tests) <b>N/A</b>                                                                                                                                                                                                                     |
|                      | 11d | Relevant concomitant care and interventions that are permitted or prohibited during the trial <b>N/A</b>                                                                                                                                                                                                                                                                         |
| Outcomes             | 12  | Primary, secondary, and other outcomes, including the specific measurement variable (eg, systolic blood pressure), analysis metric (eg, change from baseline, final value, time to event), method of aggregation (eg, median, proportion), and time point for each outcome. Explanation of the clinical relevance of chosen efficacy and harm outcomes is strongly recommended □ |
| Participant timeline | 13  | Time schedule of enrolment, interventions (including any run-ins and washouts), assessments, and visits for participants. A schematic diagram is highly recommended (see Figure) □                                                                                                                                                                                               |
| Sample size          | 14  | Estimated number of participants needed to achieve study objectives and how it was determined, including clinical and statistical assumptions supporting any sample size calculations □                                                                                                                                                                                          |
| Recruitment          | 15  | Strategies for achieving adequate participant enrolment to reach target sample size □                                                                                                                                                                                                                                                                                            |

**Methods: Assignment of interventions (for controlled trials)**

## Allocation:

|                     |     |                                                                                                                                                                                                                                                                                                                                                            |
|---------------------|-----|------------------------------------------------------------------------------------------------------------------------------------------------------------------------------------------------------------------------------------------------------------------------------------------------------------------------------------------------------------|
| Sequence generation | 16a | Method of generating the allocation sequence (eg, computer-generated random numbers), and list of any factors for stratification. To reduce predictability of a random sequence, details of any planned restriction (eg, blocking) should be provided in a separate document that is unavailable to those who enrol participants or assign interventions □ |
|---------------------|-----|------------------------------------------------------------------------------------------------------------------------------------------------------------------------------------------------------------------------------------------------------------------------------------------------------------------------------------------------------------|



|    |                |     |                                                                         |
|----|----------------|-----|-------------------------------------------------------------------------|
| 1  |                |     |                                                                         |
| 2  | Allocation     | 16b | Mechanism of implementing the allocation sequence (eg, central          |
| 3  | concealment    |     | telephone; sequentially numbered, opaque, sealed envelopes),            |
| 4  | mechanism      |     | describing any steps to conceal the sequence until interventions are    |
| 5  |                |     | assigned □                                                              |
| 6  |                |     |                                                                         |
| 7  | Implementation | 16c | Who will generate the allocation sequence, who will enrol participants, |
| 8  |                |     | and who will assign participants to interventions □                     |
| 9  |                |     |                                                                         |
| 10 | Blinding       | 17a | Who will be blinded after assignment to interventions (eg, trial        |
| 11 | (masking)      |     | participants, care providers, outcome assessors, data analysts), and    |
| 12 |                |     | how □                                                                   |
| 13 |                |     |                                                                         |
| 14 |                | 17b | If blinded, circumstances under which unblinding is permissible, and    |
| 15 |                |     | procedure for revealing a participant's allocated intervention during   |
| 16 |                |     | the trial □                                                             |
| 17 |                |     |                                                                         |
| 18 |                |     |                                                                         |

### 19 **Methods: Data collection, management, and analysis**

|    |                 |     |                                                                          |
|----|-----------------|-----|--------------------------------------------------------------------------|
| 20 |                 |     |                                                                          |
| 21 | Data collection | 18a | Plans for assessment and collection of outcome, baseline, and other      |
| 22 | methods         |     | trial data, including any related processes to promote data quality (eg, |
| 23 |                 |     | duplicate measurements, training of assessors) and a description of      |
| 24 |                 |     | study instruments (eg, questionnaires, laboratory tests) along with      |
| 25 |                 |     | their reliability and validity, if known. Reference to where data        |
| 26 |                 |     | collection forms can be found, if not in the protocol □                  |
| 27 |                 |     |                                                                          |
| 28 |                 | 18b | Plans to promote participant retention and complete follow-up,           |
| 29 |                 |     | including list of any outcome data to be collected for participants who  |
| 30 |                 |     | discontinue or deviate from intervention protocols □                     |
| 31 |                 |     |                                                                          |
| 32 |                 |     |                                                                          |
| 33 | Data            | 19  | Plans for data entry, coding, security, and storage, including any       |
| 34 | management      |     | related processes to promote data quality (eg, double data entry;        |
| 35 |                 |     | range checks for data values). Reference to where details of data        |
| 36 |                 |     | management procedures can be found, if not in the protocol □             |
| 37 |                 |     |                                                                          |
| 38 |                 |     |                                                                          |
| 39 | Statistical     | 20a | Statistical methods for analysing primary and secondary outcomes.        |
| 40 | methods         |     | Reference to where other details of the statistical analysis plan can be |
| 41 |                 |     | found, if not in the protocol □                                          |
| 42 |                 |     |                                                                          |
| 43 |                 | 20b | Methods for any additional analyses (eg, subgroup and adjusted           |
| 44 |                 |     | analyses) □                                                              |
| 45 |                 |     |                                                                          |
| 46 |                 | 20c | Definition of analysis population relating to protocol non-adherence     |
| 47 |                 |     | (eg, as randomised analysis), and any statistical methods to handle      |
| 48 |                 |     | missing data (eg, multiple imputation) □                                 |
| 49 |                 |     |                                                                          |

### 50 **Methods: Monitoring**

|    |                 |     |                                                                      |
|----|-----------------|-----|----------------------------------------------------------------------|
| 51 |                 |     |                                                                      |
| 52 | Data monitoring | 21a | Composition of data monitoring committee (DMC); summary of its role  |
| 53 |                 |     | and reporting structure; statement of whether it is independent from |
| 54 |                 |     | the sponsor and competing interests; and reference to where further  |
| 55 |                 |     | details about its charter can be found, if not in the protocol.      |
| 56 |                 |     | Alternatively, an explanation of why a DMC is not needed             |
| 57 |                 |     |                                                                      |
| 58 |                 |     |                                                                      |
| 59 |                 |     |                                                                      |
| 60 |                 |     |                                                                      |

|    |          |     |                                                                                                                                                                                   |
|----|----------|-----|-----------------------------------------------------------------------------------------------------------------------------------------------------------------------------------|
| 1  |          | 21b | Description of any interim analyses and stopping guidelines, including who will have access to these interim results and make the final decision to terminate the trial           |
| 2  |          |     |                                                                                                                                                                                   |
| 3  |          |     |                                                                                                                                                                                   |
| 4  |          |     |                                                                                                                                                                                   |
| 5  |          |     |                                                                                                                                                                                   |
| 6  | Harms    | 22  | Plans for collecting, assessing, reporting, and managing solicited and spontaneously reported adverse events and other unintended effects of trial interventions or trial conduct |
| 7  |          |     |                                                                                                                                                                                   |
| 8  |          |     |                                                                                                                                                                                   |
| 9  |          |     |                                                                                                                                                                                   |
| 10 | Auditing | 23  | Frequency and procedures for auditing trial conduct, if any, and whether the process will be independent from investigators and the sponsor                                       |
| 11 |          |     |                                                                                                                                                                                   |
| 12 |          |     |                                                                                                                                                                                   |
| 13 |          |     |                                                                                                                                                                                   |

### Ethics and dissemination

|    |                               |     |                                                                                                                                                                                                                                                                                     |
|----|-------------------------------|-----|-------------------------------------------------------------------------------------------------------------------------------------------------------------------------------------------------------------------------------------------------------------------------------------|
| 14 |                               |     |                                                                                                                                                                                                                                                                                     |
| 15 |                               |     |                                                                                                                                                                                                                                                                                     |
| 16 |                               |     |                                                                                                                                                                                                                                                                                     |
| 17 | Research ethics approval      | 24  | Plans for seeking research ethics committee/institutional review board (REC/IRB) approval □                                                                                                                                                                                         |
| 18 |                               |     |                                                                                                                                                                                                                                                                                     |
| 19 |                               |     |                                                                                                                                                                                                                                                                                     |
| 20 | Protocol amendments           | 25  | Plans for communicating important protocol modifications (eg, changes to eligibility criteria, outcomes, analyses) to relevant parties (eg, investigators, REC/IRBs, trial participants, trial registries, journals, regulators)                                                    |
| 21 |                               |     |                                                                                                                                                                                                                                                                                     |
| 22 |                               |     |                                                                                                                                                                                                                                                                                     |
| 23 |                               |     |                                                                                                                                                                                                                                                                                     |
| 24 |                               |     |                                                                                                                                                                                                                                                                                     |
| 25 |                               |     |                                                                                                                                                                                                                                                                                     |
| 26 | Consent or assent             | 26a | Who will obtain informed consent or assent from potential trial participants or authorised surrogates, and how (see Item 32) □                                                                                                                                                      |
| 27 |                               |     |                                                                                                                                                                                                                                                                                     |
| 28 |                               | 26b | Additional consent provisions for collection and use of participant data and biological specimens in ancillary studies, if applicable □                                                                                                                                             |
| 29 |                               |     |                                                                                                                                                                                                                                                                                     |
| 30 |                               |     |                                                                                                                                                                                                                                                                                     |
| 31 | Confidentiality               | 27  | How personal information about potential and enrolled participants will be collected, shared, and maintained in order to protect confidentiality before, during, and after the trial □                                                                                              |
| 32 |                               |     |                                                                                                                                                                                                                                                                                     |
| 33 |                               |     |                                                                                                                                                                                                                                                                                     |
| 34 |                               |     |                                                                                                                                                                                                                                                                                     |
| 35 |                               |     |                                                                                                                                                                                                                                                                                     |
| 36 | Declaration of interests      | 28  | Financial and other competing interests for principal investigators for the overall trial and each study site □                                                                                                                                                                     |
| 37 |                               |     |                                                                                                                                                                                                                                                                                     |
| 38 |                               |     |                                                                                                                                                                                                                                                                                     |
| 39 | Access to data                | 29  | Statement of who will have access to the final trial dataset, and disclosure of contractual agreements that limit such access for investigators                                                                                                                                     |
| 40 |                               |     |                                                                                                                                                                                                                                                                                     |
| 41 |                               |     |                                                                                                                                                                                                                                                                                     |
| 42 |                               |     |                                                                                                                                                                                                                                                                                     |
| 43 | Ancillary and post-trial care | 30  | Provisions, if any, for ancillary and post-trial care, and for compensation to those who suffer harm from trial participation                                                                                                                                                       |
| 44 |                               |     |                                                                                                                                                                                                                                                                                     |
| 45 |                               |     |                                                                                                                                                                                                                                                                                     |
| 46 | Dissemination policy          | 31a | Plans for investigators and sponsor to communicate trial results to participants, healthcare professionals, the public, and other relevant groups (eg, via publication, reporting in results databases, or other data sharing arrangements), including any publication restrictions |
| 47 |                               |     |                                                                                                                                                                                                                                                                                     |
| 48 |                               |     |                                                                                                                                                                                                                                                                                     |
| 49 |                               |     |                                                                                                                                                                                                                                                                                     |
| 50 |                               |     |                                                                                                                                                                                                                                                                                     |
| 51 |                               |     |                                                                                                                                                                                                                                                                                     |
| 52 |                               | 31b | Authorship eligibility guidelines and any intended use of professional writers                                                                                                                                                                                                      |
| 53 |                               |     |                                                                                                                                                                                                                                                                                     |
| 54 |                               |     |                                                                                                                                                                                                                                                                                     |
| 55 |                               | 31c | Plans, if any, for granting public access to the full protocol, participant-level dataset, and statistical code                                                                                                                                                                     |
| 56 |                               |     |                                                                                                                                                                                                                                                                                     |
| 57 |                               |     |                                                                                                                                                                                                                                                                                     |
| 58 |                               |     |                                                                                                                                                                                                                                                                                     |
| 59 |                               |     |                                                                                                                                                                                                                                                                                     |
| 60 |                               |     |                                                                                                                                                                                                                                                                                     |

## Appendices

|                            |    |                                                                                                                                                                                                           |
|----------------------------|----|-----------------------------------------------------------------------------------------------------------------------------------------------------------------------------------------------------------|
| Informed consent materials | 32 | Model consent form and other related documentation given to participants and authorised surrogates                                                                                                        |
| Biological specimens       | 33 | Plans for collection, laboratory evaluation, and storage of biological specimens for genetic or molecular analysis in the current trial and for future use in ancillary studies, if applicable <b>N/A</b> |

---

\*It is strongly recommended that this checklist be read in conjunction with the SPIRIT 2013 Explanation & Elaboration for important clarification on the items. Amendments to the protocol should be tracked and dated. The SPIRIT checklist is copyrighted by the SPIRIT Group under the Creative Commons "[Attribution-NonCommercial-NoDerivs 3.0 Unported](#)" license.

# BMJ Open

## Evaluation of an online parenting programme based on 'The Little parent Handbook': Study protocol for a pilot randomised controlled trial

|                                 |                                                                                                                                                       |
|---------------------------------|-------------------------------------------------------------------------------------------------------------------------------------------------------|
| Journal:                        | <i>BMJ Open</i>                                                                                                                                       |
| Manuscript ID                   | bmjopen-2016-013381.R1                                                                                                                                |
| Article Type:                   | Protocol                                                                                                                                              |
| Date Submitted by the Author:   | 19-Oct-2016                                                                                                                                           |
| Complete List of Authors:       | Owen, Dawn; Bangor University, Psychology<br>Griffith, Nia; Bangor University, Psychology<br>Hutchings, Judy; Bangor University, School of Psychology |
| <b>Primary Subject Heading</b>: | Evidence based practice                                                                                                                               |
| Secondary Subject Heading:      | Public health                                                                                                                                         |
| Keywords:                       | Clinical trials < THERAPEUTICS, STATISTICS & RESEARCH METHODS, Child & adolescent psychiatry < PSYCHIATRY                                             |
|                                 |                                                                                                                                                       |

SCHOLARONE™  
Manuscripts

1  
2  
3 **Title:** Evaluation of an online parenting programme based on ‘The Little Parent Handbook’:  
4  
5 Study protocol for a pilot randomised controlled trial  
6  
7  
8

9  
10 **Authors:** Dawn Adele Owen, Nia Griffith, Judy Hutchings  
11

12 **Author details:**

13  
14 Centre for Evidence Based Early Intervention, School of Psychology, Nantlle Building,  
15

16 Normal Site, Bangor University, Bangor, Gwynedd, LL57 2PZ, UK (01248 383 758).  
17

18 Email: [dawn.a.owen@bangor.a.uk](mailto:dawn.a.owen@bangor.a.uk)  
19  
20

21  
22  
23 School of Psychology, Wheldon Building, Room 113, Bangor University, Bangor, Gwynedd,  
24  
25 LL57 2PZ, UK.  
26

27 Email: [n.griffith@bangor.ac.uk](mailto:n.griffith@bangor.ac.uk)  
28  
29

30  
31  
32 Centre for Evidence Based Early Intervention, School of Psychology, Nantlle Building,  
33

34 Normal Site, Bangor University, Bangor, Gwynedd, LL57 2PZ, UK.  
35

36 Email: [j.hutchings@bangor.ac.uk](mailto:j.hutchings@bangor.ac.uk)  
37  
38  
39

40  
41 **Version 2: 17/10/2016**  
42  
43  
44

45 **Keywords:** child behaviour, online parenting programme, randomised controlled trial,  
46  
47 positive parenting, and health care services  
48  
49

50  
51  
52 **Word count:** 5,180  
53  
54  
55

56 **Trial Sponsor:** Bangor University, Brigantia Building, College Road, Bangor, LL57 2AS  
57  
58  
59  
60

## Abstract

**Introduction:** The online parenting programme based on ‘The Little Parent Handbook’ is a web-based parenting intervention for parents of children aged 3-8 with an interest in positive parenting. The programme focuses on strengthening parent-child relationships through encouraging positive child behaviour. This trial will evaluate whether the intervention is effective in increasing the use of positive parenting strategies outlined in the programme using parent report and blind observation.

**Methods and analysis:** This is a pilot randomised controlled trial with intervention and wait-list control conditions. The intervention is a ten-week online parenting programme to promote positive parent-child relations by teaching core social learning theory principles that encourage positive child behaviour, primarily through the use of praise and rewards. Health visitors and school nurses will circulate a recruitment poster to parents of children aged 3-8 years on their current caseloads. Recruitment posters will also be distributed via local primary schools and nurseries. Parents recruited to the trial will be randomised on a 2:1 ratio to intervention or wait-list control conditions (stratified according to child gender and age). The primary outcome measure is positive parenting as measured by a behavioural observation of parent-child interactions using the Dyadic Parent-Child Interaction Coding System [1]. Secondary outcomes include parental report measures of child behaviour, self-reported parental sense of competence, parenting behaviour and parental mental health. Data will be collected at baseline and three months later (post-intervention) for all participants and six months post-baseline for the intervention group only. ANCOVA will be the main statistical method used.

**Ethics and dissemination:** The trial has received ethical approval from the NHS Betsi Cadwaladr University Health Board Ethics Committee (REC) and the School of Psychology,

1  
2  
3 Bangor University REC (15/WA/0463). Publications of all outcomes will be in peer-  
4  
5 reviewed journals and conference presentations.  
6

7 **Trial registration:** Current Controlled Trials ISRCTN89370147 (May 5th 2016).  
8  
9

### 10 11 12 **Strengths and limitations**

- 14 • This is a randomised Controlled Trial with a wait-list control group.
- 15  
16 • The behavioural observations incorporate inter-rater reliability (20% of all  
17 observations at the separate time points).
- 18  
19 • Once randomised, intervention parents start the online programme immediately thus  
20 reducing the amount of time spent waiting for the intervention.
- 21  
22 • A limitation of this study is parents are required to log in each week and engage with  
23 the programme, this may result in some parents not fully engaging and the potential  
24 loss of follow-up data.
- 25  
26 • Due to time and funding constraints, this trial aims to enroll sixty parents, which is a  
27 fairly small sample size.
- 28  
29 • Funding and time constraints do not allow for a longer-term follow-up.  
30  
31  
32  
33  
34  
35  
36  
37  
38  
39  
40

### 41 **Background**

42  
43 Minor child problem behaviours can develop into more significant problems unless addressed  
44 while children are still young [2] and there are high costs associated with child mental health  
45 and behavioural problems [3]. Conduct problems have a significant impact on children's  
46 functioning and quality of life [4] with up to 50% of children and young people with conduct  
47 disorder developing antisocial personality disorder [5, 4]. This highlights the importance of  
48 providing early universal support to parents to avoid the small behavioural challenges faced  
49 by all parents from progressing into more costly ones.  
50  
51  
52  
53  
54  
55  
56  
57  
58  
59  
60

1  
2  
3 Children who are at risk of poor outcomes, including impairments in social, emotional and  
4 educational functioning [6], often experience harsh and inconsistent parenting from parents  
5 who show little positive parental involvement [7]. Problematic parenting strategies can be  
6 addressed through teaching positive parenting skills to target such child behaviour problems  
7 and achieve positive outcomes [8, 9, 10, 11]. These positive parenting skills that are  
8 associated with positive child outcomes are well established and include play, praise, reward,  
9 and positive affect [8].  
10  
11  
12  
13  
14  
15  
16  
17  
18  
19

20  
21 A successful intervention for parents of children with significant behavioural difficulties [10]  
22 used mediator analysis to demonstrate that the mechanism for change in child behaviour was  
23 change in parental behaviour [12]. Similarly, teaching positive parental strategies has been  
24 shown to increase positive parenting style as measured by direct observation of parent-child  
25 interactions [13]. Whilst these studies have focused on programmes for parents of children  
26 with, or at risk of, significant problems, there is less evidence for the benefits of parenting  
27 programmes for parents in general. Public policy recognises the need for early intervention  
28 and support for families, but it is not universally available and remains “patchy” [14].  
29  
30  
31  
32  
33  
34  
35  
36  
37

38 In the UK, the National Institute for Health and Care Excellence [4] identified the Incredible  
39 Years Parent Programme as a treatment for conduct disorder [15], and this evidence-based  
40 programme was introduced to North West Wales through the NHS Child and Adolescent  
41 Mental Health Service in the 1990s (CAMHS) [15]. Numerous Randomised Controlled Trials  
42 have shown significant improvements for child behaviour following the intervention [10, 16].  
43  
44 However, these programmes are not readily available. The Flying Start initiative offers  
45 parenting programmes on an annual basis to families living in disadvantages areas with a  
46 child aged four years or younger [17], and may not be accessible to some families due to  
47 barriers [18] for example, the inconvenience of travel to the clinical setting or organising  
48  
49  
50  
51  
52  
53  
54  
55  
56  
57  
58  
59  
60



1  
2  
3 childcare arrangements for groups scheduled during weekday hours can be particularly  
4  
5 burdensome [19]. Additionally, these programmes can be costly as an effective analysis of  
6  
7 the Incredible Years basic parenting programme showed that the intervention improved  
8  
9 children's behaviour at a cost of £1344 per child [20].  
10

11  
12  
13  
14 Challenges in the availability of parenting programmes has resulted in health visitors and  
15  
16 school nurses supporting the majority of families in the UK with children at significant risk  
17  
18 of poor outcomes, reducing their ability to provide adequate support to all families. A survey  
19  
20 of health visitors and school nurses reported that 53% of health visitors saw between 21-50,  
21  
22 and 46% of school nurses saw between 50-99 children with emotional or behavioural  
23  
24 problems each week [21]. A review of parental and professional perceptions of barriers to  
25  
26 parenting interventions [18] highlighted five challenges for both parents and facilitators; (1)  
27  
28 situational barriers, (2) psychological barriers including fear of being criticised or stigmatised  
29  
30 [22], (3) lack of information/misconception about services, (4) availability of services and (5)  
31  
32 poor interagency collaboration. These barriers suggest there could be benefits from  
33  
34 alternative modes of programme delivery including behavioural interventions delivered  
35  
36 online [23].  
37  
38  
39  
40  
41  
42

43 Technology has the potential to enhance parental engagement, teach key parenting skills,  
44  
45 reduce the cost burden associated with group and one-to-one interventions, alleviate  
46  
47 pressures on services, particularly those delivered by health visitors and school nurses, and  
48  
49 offer more flexible access [23, 24, 25]. Access to technology is now feasible for many  
50  
51 parents due to increased availability of internet access [26]. The number of households with  
52  
53 computers increased from 8% to 60% between 1984 and 2003 in the US, and in the UK by  
54  
55 2015, 86% of households had internet access [27]. The majority of parents (75%) now use  
56  
57  
58  
59  
60

1  
2  
3 social media to obtain parent-related information [28] with over eight million people visiting  
4  
5 an online parenting information and advice website every month [29].  
6  
7

8  
9  
10 Although as yet limited in number, web-based programmes for behaviour change (including  
11  
12 weight loss and alcohol reduction) have achieved positive outcomes [30, 31], suggesting that  
13  
14 technology can be an effective means of providing behaviour change advice and support.

15  
16 Similarly, there is evidence demonstrating increased positive parenting following web-based  
17  
18 interventions [32, 33]. Parents of children aged between 3-12 years with conduct disorder  
19  
20 who accessed an online parenting programme, reported less use of harsh parenting and more  
21  
22 use of positive praise compared to wait-list control parents [33], and these findings were  
23  
24 maintained at the six-month follow-up. However, evidence in this field is currently limited  
25  
26 and universal programmes need more evidence to demonstrate effectiveness with families  
27  
28 who are not necessarily experiencing significant levels of child problem behaviours. Bayer  
29  
30 and colleagues highlighted the importance of offering parental support universally (1) so as  
31  
32 not to stigmatise at-risk populations and (2) to prevent missing early signs of problems for  
33  
34 families not classified as at-risk [34].  
35  
36  
37  
38  
39

40 Web based interventions allow parents to access support at home at a time most convenient  
41  
42 for their individual family circumstances, eliminating one of the barriers associated with  
43  
44 more traditional intervention approaches. The internet allows access to advice without having  
45  
46 to seek referral or further advice from health care professionals. This could allow  
47  
48 professionals, such as health visitors and school nurses, more time and resources to target  
49  
50 clinical (or identified at-risk) populations with more individualised interventions. Providing  
51  
52 parents access to online advice and support could increase parental understanding of how to  
53  
54 promote positive child development and potentially prevent the development of child  
55  
56  
57  
58  
59  
60

1  
2  
3 behaviour problems. Providing positive parenting support in general could avoid the  
4  
5 intergenerational transfer of poor parenting practices [14].  
6  
7  
8

### 9 10 **Rationale**

11 The aim of the web based parenting programme, based on ‘The Little Parent Handbook’ [35],  
12  
13 is to provide information and activities based on core social learning theory principles  
14  
15 associated with positive parenting practices and good child outcomes to parents of children  
16  
17 aged 3-8 years. The study will explore parental satisfaction and engagement with the  
18  
19 programme and whether it is effective in demonstrating increased use of positive parental  
20  
21 practices in parents of children with a wide age range and varying behavioural patterns.  
22  
23  
24

### 25 26 **Aims and Objectives**

27 The aim of this trial is to conduct a pilot randomised controlled trial (RCT) on the  
28  
29 effectiveness of an online parenting programme, for parents of children aged 3-8 years who  
30  
31 would like to learn more about positive parenting by comparing outcomes for intervention  
32  
33 and wait-list control groups.  
34  
35  
36

37  
38  
39 The key objectives are to establish whether the programmes successfully engages and retains  
40  
41 parents; whether the programme produces statistically significant increases in positive  
42  
43 parenting as observed in a parent-child observation when compared to wait-list control  
44  
45 parents; and to determine whether the online programme produces any changes in secondary  
46  
47 outcomes (parent-reported child behaviour, parent self-reported sense of competence,  
48  
49 behaviour and mental health). The study hypotheses are:  
50  
51

- 52  
53 i. the online parenting programme will lead to significant increases in positive  
54  
55 parenting strategies as displayed in the behavioural observation coded using  
56  
57 Dyadic Parent-Child Interaction Coding System [1]  
58  
59  
60

- 1  
2  
3 ii. the online programme will significantly increase positive behaviours and  
4  
5 mental health of parents, including self-reported parenting skills, parental  
6  
7 sense of competence and parental mental health  
8  
9  
10 iii. the online programme will lead to reduction in parent-reported levels of child  
11  
12 problem behaviour as reported using the Eyberg Child Behaviour Inventory  
13

14 [36]  
15  
16  
17  
18

## 19 **Methods/Design**

### 20 **Trial design**

21  
22 This pilot RCT will explore the effectiveness of an online parenting programme. Parents of  
23  
24 children aged 3-8 years who would like to learn more about positive parenting will be  
25  
26 randomly allocated to the intervention condition with immediate access to the programme or  
27  
28 to a 3-month wait-list control group on a 2:1 ratio.  
29  
30  
31  
32

### 33 **Setting**

34  
35 Self-report and observational data will be collected in parents' homes during home visits and  
36  
37 parents will access the programme at home. The programme encourages parents to practice  
38  
39 the behavioural skills covered in the programme at home with their child.  
40  
41  
42  
43  
44

### 45 **Participants**

46  
47 Parents of children aged 3-8 years who would like to learn more about positive parenting, in  
48  
49 particular how to encourage positive child behaviour through praise and reward, are invited  
50  
51 to participate in the study.  
52  
53  
54  
55

### 56 **Eligibility Criteria**

57  
58  
59  
60

**Inclusion criteria.**

To be eligible for the study parents must have a child aged between 3-8 years, be able to understand English (as the programme is only currently available in English) and be able to access the internet on a PC, laptop, iPad or tablet. The software does not yet support smartphones. Parents who are currently receiving support from services are also invited to participate (they will be asked to record which services they are receiving and the duration).

**Exclusion criteria.**

Parent does not have a child aged between 3-8 years, does not understand English and does not have access to the internet.

**Recruitment**

Health visitors and school nurses in Gwynedd and Anglesey (North-West Wales) will approach parents of children aged 3-8 years on their own caseloads and describe the online programme and the research trial. If parents decide that they might want to sign up for the study, they will be asked by the health visitor/school nurse to complete a note of interest form, that will be sent to the research office at Bangor University, giving consent for a member of the research team to contact the parent.

On receipt of the note of interest form, a member of the research team will contact the parent to arrange a convenient time to visit and discuss the project further. The researcher will go through the information sheet with the parent during this home visit and ensure that any questions are answered. If the parent is happy to continue, the researcher will obtain informed consent from the parent to participate in the study. Only when consent has been obtained will

1  
2  
3 the researcher proceed to ask the parent to fill out the self-report measures and take part in a  
4  
5 30-minute behavioural observation of parent-child interaction.  
6  
7

8  
9  
10 In addition to health visitors and school nurses approaching parents on their caseloads,  
11  
12 recruitment posters will be distributed in primary schools and nurseries in Gwynedd,  
13  
14 Anglesey, Conwy and Denbighshire. An e-mail address and a contact telephone number will  
15  
16 be provided on the recruitment poster so that interested parents can contact the research team  
17  
18 directly. Parents will either be sent a detailed information sheet via e-mail or the researcher  
19  
20 will discuss the research in depth over the telephone. If parents would still like to participate,  
21  
22 arrangements will then be made for a home visit to discuss the study further. Similarly,  
23  
24 parents who hear about the study through word of mouth can contact the research team for  
25  
26 further information regarding the trial.  
27  
28

29  
30  
31 It is expected that both forms of recruitment (poster and health visitor/ school nurse) will  
32  
33 attract parents from varying socioeconomic backgrounds who are experiencing varying levels  
34  
35 of child problem behaviour. For the purpose of this pilot trial, baseline characteristics of all  
36  
37 parents will be reported and compared with the population as a whole. Additionally, the  
38  
39 percentage of parents recruited from each source will be reported and their characteristics  
40  
41 compared in order to explore the effects of the intervention for the whole sample.  
42  
43  
44  
45  
46

## 47 **Intervention**

### 48 **Origins of ‘The Little Parent Handbook’**

49  
50 Trials conducted by Hutchings and colleagues during the 1990s [37, 38] with parents and  
51  
52 health visitors demonstrated positive outcomes from teaching effective behavioural strategies  
53  
54 to parents of children with challenging behavior for both clinically referred and pre-school  
55  
56  
57  
58  
59  
60

1  
2  
3 prevention populations. Significant overall improvements were found for intervention  
4  
5 families on measures of child behaviour, parenting practices and maternal mental health [37,  
6  
7 39]. As part of these trials intervention parents were provided with help sheets that were  
8  
9 subsequently published as 'The Little Parent Handbook' [35]. These trials were multi-  
10  
11 component trials and so it is difficult to establish the true extent of the effectiveness of the  
12  
13 parent help-sheets, however they contained the evidence based behavioural principles on  
14  
15 which the interventions were based.  
16  
17  
18  
19

### 20 21 **LifeGuide online behaviour change software**

22  
23 The LifeGuide software, developed at the University of Southampton [40], was used in the  
24  
25 creation of the online parenting programme. The aim of LifeGuide is to continuously  
26  
27 develop, evaluate and disseminate a set of tools that will allow researchers to flexibly create  
28  
29 and modify online behaviour change interventions [41]. LifeGuide software allows  
30  
31 researchers to deliver behavioural principles both through programme delivery (text message  
32  
33 prompts etc.) and programme content (The Little Parent Handbook).  
34  
35  
36  
37

38  
39 Features of the online parenting programme include automated feedback based on individual  
40  
41 performance, online praise messages for spending time with their child, text message  
42  
43 reminders to access the next session, and multiple-choice quizzes to test knowledge. The  
44  
45 programme also enables the collection of individual usage data (which can be extracted into  
46  
47 Microsoft Excel).  
48  
49

### 50 51 52 **The Little Parent Handbook Online Programme**

53  
54 The programme introduces evidence-based behavioural principles that have been shown to be  
55  
56 effective in strengthening parent-child relations through encouraging positive child behaviour  
57  
58  
59  
60

1  
2  
3 [42]. A small-scale feasibility study of the online parenting programme was conducted at the  
4  
5 end of 2015 with the aim of providing user feedback prior to conducting this larger-scale  
6  
7 RCT trial. This study had no measures and participants were not randomised, instead twenty  
8  
9 participants were asked to complete the intervention and fill out a feedback form. Overall,  
10  
11 feedback was very positive with the majority of participants reporting that they would  
12  
13 recommend the programme to parents of children aged 3-8 years. Minor modifications were  
14  
15 made based on the feedback, these include text message prompting parents to log-in to  
16  
17 subsequent sessions, more video examples of positive parenting and the option to look back  
18  
19 over previously completed chapters again. The intervention consists of ten chapters, eight  
20  
21 content and two revision chapters. The topics are:  
22  
23

- 24 i. Spending special time with your child through play
- 25
- 26 ii. Encouraging good behaviour through praising
- 27
- 28 iii. Encouraging good behaviour through rewarding
- 29
- 30 iv. How to get better at giving instructions [part 1]
- 31
- 32 v. How to get better at giving instructions [part 2]
- 33
- 34 vi. Revision
- 35
- 36 vii. Ignoring problem behaviour
- 37
- 38 viii. Teaching your child new behaviours
- 39
- 40
- 41 ix. How to develop your child's language skills
- 42
- 43
- 44 x. Revision
- 45
- 46

47 Intervention parents will be provided with a link to the website and a username and  
48  
49 password. Contact details of an administrator will be provided in case any parent requires  
50  
51 technical support during the programme. Parents will be asked to log in and complete one  
52  
53 chapter each week, each chapter will take approximately thirty minutes to complete. The  
54  
55 software ensures that parents have completed each chapter before they can move on to the  
56  
57  
58  
59  
60



1  
2  
3 next one; they are not required to complete the chapter in one sitting. Log in details allow  
4  
5 parents to access the programme as many times as they wish. The intervention has been  
6  
7 programmed to take parents to the last page that they viewed on the next occasion that they  
8  
9 log in to avoid parents having to start the programme from the beginning. In order to give  
10  
11 parents sufficient time to practice the principles outlined in the individual chapters, the  
12  
13 intervention has been programmed so that there will be a minimum five-day gap between  
14  
15 each chapter. If parents log in before the five days have elapsed, they will be offered the  
16  
17 opportunity to look back over previously completed chapters again.  
18  
19  
20  
21  
22

23 The programme asks parents to practice the skills presented in the chapter with their child at  
24  
25 home. Each chapter concludes with a suggested practice activity. Parents are also encouraged  
26  
27 to keep paper records detailing their activities. Parents can also record online each week how  
28  
29 many times they have played with their child by selecting the amount of times from a drop-  
30  
31 down menu. The programme encourages parents to spend more time playing with their child  
32  
33 in order to strengthen their relationship, and they are continuously reminded to engage in this  
34  
35 activity throughout the programme both by praise messages and by being prompted to record  
36  
37 the amount of time spent playing. A praise message congratulates the parent for spending  
38  
39 time with their child if they report spending time with their child during the past week, or  
40  
41 since the last time they logged in. If parents do not report having spent time with their child  
42  
43 during the past week, a prompt message appears reminding them of the importance of this  
44  
45 activity.  
46  
47  
48  
49  
50  
51

52 Each chapter covers an individual behavioural principle that aims to strengthen the parent-  
53  
54 child relationship. Parents read through information (or listen via an audio button if they  
55  
56 prefer) and watch video examples of positive parenting. The video clips are short in length  
57  
58  
59  
60

1  
2  
3 (all are less than one minute long) allowing the opportunity for multiple viewing. At the end  
4  
5 of each chapter there is a longer video and parents are asked to answer three questions based  
6  
7 on the video clip (by selecting yes or no) in order to develop their observational skills and to  
8  
9 encourage them to identify positive child behaviours. For example, at the end of chapter two  
10  
11 (praising positive behaviour) parents are prompted to watch a video of a parent giving her  
12  
13 child a specific labelled praise, and then answering three questions based on the video; (1)  
14  
15 Did the parent praise the child immediately? (2) Was the parent close to the child when  
16  
17 praising? (3) Did the parent share positive feelings when praising? A score out of three and  
18  
19 the correct answers are provided for the responses to the videos.  
20  
21  
22  
23  
24

25 Each chapter ends with a multiple-choice quiz to test parents' knowledge and understanding  
26  
27 of key principles. Parents will be given online automated feedback on their quiz scores in  
28  
29 addition to the correct answers. Parents also have an option to download and print a summary  
30  
31 sheet for each chapter.  
32  
33  
34  
35

36 Parents will be given an opportunity to receive text message prompts to help keep them on  
37  
38 track. If they would like to receive text messages, they will be asked at the beginning of the  
39  
40 programme to enter their mobile phone number. The programme is fully automated, and the  
41  
42 research team will have no contact with parents during the intervention. The centre  
43  
44 administrator can be contacted if parents require any technical assistance during the study. A  
45  
46 text message will be sent five days after the completion of a chapter informing the parent that  
47  
48 the next chapter is now available. If the parent has not logged into the programme to  
49  
50 complete the next chapter three days after it becomes available, a reminder text will be sent  
51  
52 prompting them to log in and complete the next chapter. If a parent still has not logged in,  
53  
54 weekly reminders will be sent.  
55  
56  
57  
58  
59  
60

1  
2  
3 Baseline data will be collected prior to randomisation and, once it is completed, intervention  
4  
5 parents will receive a notification of their status and their log in details, whilst parents in the  
6  
7 wait-list control group will be informed that they will have access to the programme after  
8  
9 three months. Follow up data will be collected after three months regardless of whether  
10  
11 intervention parents have completed the programme. Once post-intervention data has been  
12  
13 collected, control group parents will receive their log in details for the programme. On  
14  
15 completion of both baseline and follow-up visits, families will receive a children's book as a  
16  
17 thank you for their time. On completion of all measures, all parents will receive a copy of  
18  
19 'The Little Parent Handbook'. Data collection will begin in April 2016 and end in February  
20  
21 2017.  
22  
23  
24  
25  
26  
27

## 28 **Study Outcomes**

### 29 **Primary outcome**

30  
31 The primary outcome is to establish whether the online parenting programme produces  
32  
33 significant changes in positive parenting practices from baseline to follow-up as recorded  
34  
35 using the DPICS. The researcher will observe the parent and child engaging in child-led play  
36  
37 for thirty minutes. This coding system was specifically designed to assess the quality of  
38  
39 parent-child social interaction [43]. The DPICS has demonstrated high inter-rater reliability  
40  
41 for parent and child behaviours,  $r = 0.67$  to  $1.0$  and  $r = 0.76$  to  $1.0$  respectively [43]. Direct  
42  
43 observation was selected as the primary outcome as direct observational methods provide a  
44  
45 more precise account of behaviour defined by the researcher and not the parent [44].  
46  
47  
48

49 Additionally, this observational measure has been used in a number of previous studies at the  
50  
51 centre [10, 38, 45].  
52  
53  
54  
55  
56  
57  
58  
59  
60

1  
2  
3 There are eight DPICS parent categories summarised in terms of positive and negative  
4 parenting. Positive parenting categories comprise of direct command, labelled praise,  
5 unlabelled praise and descriptive commenting/verbal labelling. Negative parenting categories  
6 comprise of indirect command, questions, critical statement and negative command. No child  
7 categories will be recorded; child behaviour will be measured using the parent report ECBI  
8 only, as the main purpose of this study is to see whether the intervention has an affect on  
9 parental behaviour. Observational coding is continuous and records the total frequency of  
10 each category of parent behaviour for a total of thirty minutes. Inter-rater levels of reliability  
11 will be assessed for 20% of all observations at all three-time points.  
12  
13  
14  
15  
16  
17  
18  
19  
20  
21  
22  
23  
24

### 25 **Secondary outcomes**

26  
27 The following secondary outcomes will be collected at the three time points by the research  
28 team for the intervention group and twice for the wait-list control group.  
29  
30

- 31  
32 • Child behaviour as measured by the Eyberg Child Behaviour Inventory [1]. This  
33 measure is a 36-item inventory completed by the parent to assess the frequency and  
34 intensity of child behavioural problems for children aged 2-16 years, and has been  
35 used in many previous trials including several that have been conducted at the centre  
36 [10, 37]. Factor analyses of the ECBI for both children and adolescents indicate that it  
37 is a uni-dimensional measure of conduct problem behaviours [36].  
38  
39
- 40  
41 • Parenting practices as measured by the Arnold O’Leary Parenting Scale [46]. This is a  
42 30-item inventory with three subscales measuring parental behaviour: laxness, over-  
43 reactivity and verbosity. Responses are recorded on a seven-point scale with two  
44 alternative responses to a particular parental situation. The parenting scale has been  
45 shown to exhibit adequate internal validity and test-retest reliability [46] in addition to  
46  
47  
48  
49  
50  
51  
52  
53  
54  
55  
56  
57  
58  
59  
60

1  
2  
3 demonstrating significant correlations with observational measures of child problem  
4  
5 behaviour [46].  
6

- 7  
8 • Parental confidence as measured by the Parental Sense of Competence questionnaire  
9  
10 [47]. This 17-item likert-scale questionnaire measures competence on two separate  
11  
12 dimensions: satisfaction and efficacy. The satisfaction questions measure parental  
13  
14 anxiety, motivation and frustration (for example, ‘sometimes I feel like I’m not  
15  
16 getting anything done’) and the efficacy question examine competence, capability  
17  
18 levels and problem-solving skills (for example, ‘I meet my own personal expectations  
19  
20 for expertise in caring for my child’) in relation to parenting [47]. Ohan, Leung and  
21  
22 Johnston [48] replicated the factor structure of the Parenting Sense of Competence  
23  
24 Scale produced by Johnston and Mash [47], and provided evidence that the  
25  
26 satisfaction and efficacy scales from this measure assess distinct aspects of parenting  
27  
28 self-esteem.  
29  
30
- 31  
32 • Parental mental health as measured by the General Health Questionnaire [49]. This is  
33  
34 a 30-item questionnaire and each item invites one of four responses in order to assess  
35  
36 psychiatric symptoms including social dysfunction, sleeping patterns and depression  
37  
38 [50]. The responses include ‘better than usual’, ‘same as usual’, ‘less than usual’ and  
39  
40 ‘much less than usual’ to questions such as ‘have you found everything getting on top  
41  
42 of you?’ and ‘have you been getting edgy and bad tempered?’ This measure was used  
43  
44 as research has demonstrated the association between maternal mental health and  
45  
46 child conduct problems [51]. Reliability coefficients of the questionnaire have ranged  
47  
48 from 0.78 to 0.95 in various studies [52]. There have been several factor analyses of  
49  
50 the GHQ-30 in relatively large community samples [50].  
51  
52  
53  
54  
55

### 56 **Demographic information**

57  
58  
59  
60

1  
2  
3 Demographic information will be collected from all participants at baseline prior to  
4  
5 randomisation. The demographic questionnaire is based on the 'Personal Development  
6  
7 and Health Questionnaire' [53] and will include data on socioeconomic status, including  
8  
9 poverty, parental educational level and single-parent status. The questionnaire will cover  
10  
11 the following information:  
12

- 13  
14  
15  
16 • Age of parent and child, gender of parent and child, child diagnosis, parent's  
17  
18 relationship to the child (biological or non-biological parent), parent's age at birth of  
19  
20 first child, how many children the parent has, ages of all children, parent's current  
21  
22 relationship status, partner's relationship to the child, housing situation, employment  
23  
24 status, income, parent's level of education and whether they have previously attended  
25  
26 a parenting course. An additional question regarding their internet usage is also  
27  
28 included.  
29  
30  
31  
32  
33

### 34 **Data Collection**

35  
36 Members of the research team will collect parental self-report measures and observational  
37  
38 data on parent-child interaction using the DPICS behaviour coding system, during home  
39  
40 visits at baseline and follow-up. There is a possibility that parents will drop out of the  
41  
42 programme before the end; nonetheless all efforts will be made to collect follow-up data.  
43  
44 Parents will also be asked to complete a short feedback/satisfaction questionnaire at the end  
45  
46 of the study to share their views of the programme.  
47  
48  
49  
50

51  
52 The DPICS has been used in a number of studies evaluating parenting programmes [10, 46,  
53  
54 52]. Research team members are already trained in DPICS coding and have reached 80%  
55  
56 inter-rater reliability across all categories. At least two coders, to establish inter-rater  
57  
58  
59  
60

1  
2  
3 reliability, will code 20% of observations at each time-point simultaneously (baseline and  
4  
5 follow-up). Frequent practice sessions and meetings will be held to discuss any matters  
6  
7 arising and to ensure maintenance of a minimum level of 80% reliability.  
8  
9

### 10 11 **Sample Size**

12  
13  
14 The intention is to enroll 60 parents (40 to intervention and 20 to wait-list control,  
15  
16 randomised on a 2:1 ratio). Due to limited funds and time restrictions associated with  
17  
18 recruitment and data collection, a larger sample size would be difficult to recruit within the  
19  
20 time frame. However, this is a pilot RCT study and is exploratory in nature; and a sample size  
21  
22 of 60 parents should be sufficient to explore initial outcomes in terms of encouragement in  
23  
24 the use of positive parental strategies.  
25  
26  
27  
28

### 29 30 **Randomisation**

31  
32 Once all of the data for individual parents have been collected at baseline, parents will be  
33  
34 randomised to either the intervention or a wait-list control condition on a 2:1 ratio. This  
35  
36 allows for the evaluation of a larger intervention sample whilst also reducing the number of  
37  
38 parents waiting for the intervention. This design is favoured for research in this field [10]. A  
39  
40 control condition was favoured over an alternative treatment condition as the researchers  
41  
42 wanted to ensure that all participants received access to the intervention. The randomisation  
43  
44 will be stratified according to child age (3-5 and 6-8 years old) and gender (male and female)  
45  
46 using the online software 'sealed envelope'. The centre administrative assistant will  
47  
48 undertake the randomisation process, which will require entering the participant identification  
49  
50 number, child age and child gender. The software will then generate the decision on whether  
51  
52 the participant has been allocated to the intervention (group 1) or control (group 2) condition.  
53  
54  
55 Parents will receive a letter from the administrator informing them of their group allocation  
56  
57  
58  
59  
60

1  
2  
3 and intervention parents will receive the link to the website and their log in details with this  
4  
5 letter. Control parents will be informed that they will receive their log in details upon  
6  
7 completion of the second home visit (post-intervention data).  
8  
9

10  
11  
12 *(Insert Figure 1 here)*  
13

### 14 15 16 **Blinding**

17  
18 Baseline measures will be completed prior to randomisation and parents will be asked (during  
19  
20 home visits) not to reveal their group allocation to researchers in order, as far as possible, to  
21  
22 keep the researchers blind to parent group allocation. However, some parents may reveal  
23  
24 their allocation during the first follow-up home visits. In this instance, researchers will make  
25  
26 a record of this. Due to the design of the study, it will not be possible to keep the researchers  
27  
28 blind to group allocation at the second six-month follow-up stage as they will only involve  
29  
30 intervention parents. However the key measures are parent report questionnaires and the  
31  
32 frequency based behavioural observation that incorporates inter-rater reliability. If high levels  
33  
34 of unmasking occur, a variable will be added to the analysis to control for this.  
35  
36  
37  
38  
39

### 40 41 **Statistical Analysis**

42  
43 Baseline characteristics for all parents and children will be analysed and checked for  
44  
45 differences (if any) between the intervention and wait-list control groups. Any differences  
46  
47 will be recorded and accounted for in the analysis. ANCOVA will be used as the main  
48  
49 analysis method to compare the intervention and wait-list control groups. Any missing data  
50  
51 will be treated using multiple imputation, a relatively flexible, general-purpose approach to  
52  
53 dealing with missing data [54].  
54  
55  
56  
57  
58  
59  
60



## Discussion

This trial will provide information on the effectiveness of an online parenting programme, an intervention designed to increase positive parenting for parents of children aged 3-8 years.

The effects of the intervention on child behaviour, parenting behaviour, parental mental health and parental sense of competence will also be assessed. This project is timely when considering the current situation with regards to rising numbers of children displaying behaviour problems [4] and the known impact of parenting style on the establishment and maintenance child behaviour problems [52, 12, 35]. Additionally, this online programme targets intervention barriers, as parents can complete the web-based programme at home at a convenient time without relying on referrals from professionals.

This intervention has the potential to be a cost-effective early intervention prevention resource both for parents for whom no support would otherwise be available and/or as an alternative cost effective resource for use by the health care services [55]. An evidence-based online intervention could allow professionals to spend more time and resources supporting families with more significant problems, by enabling parents who require general parenting support to access a web-based programme. This could potentially reduce the number of families seeking advice for whom no service currently exists [19].

### Proposed results

This evaluation of a web version of a parenting programme based on 'The Little Parent Handbook', which itself includes material developed as part of an evidence-based intervention, should be a useful addition to the parenting literature. Both parents recruited to the trial and healthcare professionals will be notified of the results of the trial by means of a letter. Researchers will also verbally present the findings to healthcare professionals. If

1  
2  
3 significant benefits are found, the intervention could be made available for health visitors and  
4  
5 school nurses to distribute to parents on a regular basis, although there are no plans for wider  
6  
7 dissemination at this current stage due to cost implications. It is hypothesised that the online  
8  
9 programme will encourage parents to use positive parenting strategies, including spending  
10  
11 more time with their child and praising and rewarding positive child behaviour. Additionally,  
12  
13 it is hypothesised that the online programme will improve a range of outcomes including self-  
14  
15 reported parenting practices, parental mental health, parental confidence and child behaviour.  
16  
17  
18  
19

### 20 21 **Trial status**

22  
23 The trial is currently on going. Baseline measures for all parents were completed in July 2016  
24  
25 and 3 month-follow up visits are due to be completed by October 2016.  
26  
27

### 28 29 **Abbreviations**

30  
31 NICE: The National Institute for Health and Care Excellence; ONS: Office for National  
32  
33 Statistics, ANCOVA; Analysis of Covariance; REC: Research Ethics Committee  
34  
35  
36  
37

### 38 39 **Author's contributions**

40  
41 DAO: designing of the online programme, manuscript writing, gaining ethical approval, data  
42  
43 collection, data analysis, critical revision and final approval of manuscript. NG: critical  
44  
45 revision and final approval of manuscript. JH: author of 'The Little Parent Handbook',  
46  
47 critical revision and final approval of manuscript.  
48  
49  
50

51  
52 **Competing interests:** The third author [JH] is the author of 'The Little Parent Handbook.'  
53  
54  
55  
56  
57  
58  
59  
60

## References

1. Eyberg S, & Robison E. Dyadic Parent-Child Interaction Coding System: A Manual. The Parenting Clinic, University of Washington 1981.
2. Nixon R. Treatment of behaviour problems in pre-schoolers: A review of parent training programs. *Clinical Psychology Review* 2002; 22; 525-546.
3. Knapp M, McCrone P, Fombonne E, et al. The Maudsley long-term follow-up of child and adolescent depression. *The British Journal of Psychiatry* 2002; 180(1); 19-23.
4. National Institute for Health and Care Excellence. Antisocial behaviour and conduct disorders in children and young people: recognition and management. Retrieved from <https://www.nice.org.uk/guidance/cg158> (Accessed May 2013).
5. Foster E, & Jones D. The high costs of aggression: Public expenditures resulting from conduct disorder. *American Journal of Public Health* 2005; 95(10); 1767-1772.
6. Frick P, & Loney B. Outcomes of children and adolescents with oppositional defiant disorder and conduct disorder. In Handbook of disruptive behaviour disorders. Springer US 1999; 507-524.
7. Patterson G, DeBaryshe B, & Ramsey E. A developmental perspective on antisocial behaviour. *American Psychologist* 1990; 44, 329-335.
8. Furlong M, McGilloway S, Bywater T, et al. Cochrane Review: Behavioural and cognitive-behavioural group-based parenting programmes for early-onset conduct problems in children aged 3 to 12 years (Review). *Evidence-Based Child Health: A Cochrane Review Journal* 2012; 8(2), 318-692.
9. Markie-Dadds C, & Sanders M. Self-directed Triple P (positive parenting programme) for mothers with children at-risk of developing conduct problems. *Behavioural and Cognitive Psychotherapy* 2006; 34, 259-275.
10. Hutchings J, Bywater T, Daley D, et al. Parenting intervention in Sue Start services for children at risk of developing conduct disorder: pragmatic randomised controlled trial. *British Medical Journal* 2007; 334(7595), 678.
11. McMahon R, & Forehand R. *Helping the noncompliant child: Family-based treatment for oppositional behaviour*. Guilford Press 2005.
12. Gardner F, Hutchings J, Bywater T, et al. Who benefits and how does it work? Moderators and mediators of outcome in an effectiveness trial of a parenting intervention. *Journal of Clinical Child & Adolescent Psychology* 2010; 39(4), 568-580 2010.
13. Webster-Stratton C, Reid J, & Hammond M. Social skills and problem-solving training for children with early-onset conduct problems: Who benefits? *Journal of Child Psychology and Psychiatry* 2001; 42(7), 943-952.

14. Allen G. Early Intervention: The next steps. *An independent report to Her Majesty's Government*. The Stationery Office 2011.
15. Hutchings J, & Bywater T. Evidence for the Incredible Years (IY) Programmes in Wales. 2010.
16. Jones K, Daley D, Hutchings J, et al. (2007). Efficacy of the Incredible Years Basic parent-training programme as an early intervention for children with conduct problems and ADHD. *Child: Care, Health and Development*, 2007, 33(6), 749-756.
17. Welsh Government Website. Retrieved from <http://gov.wales/topics/people-and-communities/people/children-and-young-people/parenting-support-guidance/help/flyingstart/?lang=en> (Accessed October 2016).
18. Koerting J, Smith E, Knowles M, et al. Barriers to, and facilitators of, parenting programmes for childhood behaviour problems: a qualitative synthesis of studies of parents' and professionals' perceptions. *European child & adolescent psychiatry* 2013; 22(11); 653-670.
19. Lingley-Pottie P, & McGrath P. Distance therapeutic alliance: the participant's experience. *Advances in Nursing Science* 2007; 30(4); 353-366.
20. Edwards R, Céilleachair A, Bywater T, et al. Parenting programme for parents of children at risk of developing conduct disorder: cost effectiveness analysis. *BMJ* 2007; 334(7595); 682.
21. Wilson P, Furnivall J, Barbour R, et al. The work of health visitors and school nurses with children with psychological and behavioural problems. *Journal of advanced nursing* 2008; 61(4); 445-455.
22. Elgar F, & McGrath P. Self-administered psychosocial treatments for children and families. *Journal of Clinical Psychology* 2003; 59(3); 321-339.
23. Wantland D, Portillo C, Holzemer W, et al. The effectiveness of a web-based versus non web-based interventions: A meta-analysis of behavioural change outcomes. *Journal of Medical Internet Research* 2004; 6(4).
24. Bert S, Farris J, & Borkowski J. Parent training: Implementation strategies for adventures in parenting. *The Journal of Primary Prevention* 2008; 29; 243-261.
25. Jones D, Forehand R, Cuellar J, et al. Technology-enhanced programme for child disruptive development and pilot randomized control trial. *Journal of Clinical Child and Adolescent Psychology* 2014; 43(1); 88-101.
26. Office for National Statistics. Statistical Bulletin. Internet Access – Households and Individuals. London: Office for National Statistics 2013.
27. Office for National Statistics. Statistical Bulletin. Internet access- households and individuals 2015. London: Office for National Statistics 2015.

- 1
- 2
- 3 28. Duggan M, & Lenhart A. Parents and social media. Pew Research Centre. Retrieved
- 4 from <http://www.pewinternet.org/2015/07/16/parents-and-social-media/> (accessed
- 5 May 2015).
- 6
- 7 29. Netmums. Retrieved from <https://netmums.com/home/about-us> (accessed June 6th
- 8 2016).
- 9
- 10 30. Gold B, Burke S, Pintauro S, et al. Weight loss on the web: A pilot study comparing a
- 11 structured behavioural intervention to a commercial programme. *Obesity* 2006; 15(1);
- 12 155-164.
- 13
- 14 31. Linke S, Browne A, & Wallace P. Down your Drink: A web-based intervention for
- 15 people with excessive alcohol consumption. *Alcohol and Alcoholism* 2004; 3(91); 29-
- 16 32.
- 17
- 18 32. Baggett K, Davis B, Feil E, et al. Technologies for expanding the research of
- 19 evidence-based interventions: Preliminary results for promoting social-emotional
- 20 development in early childhood. *Topics in Early Childhood Special Education* 2010.
- 21 doi: 10.1177/0271121409354782
- 22
- 23 33. Enebrink P, Högström J, Forster M, et al. Internet-based parent management training:
- 24 A randomised controlled study. *Behaviour research and Therapy* 2012; 50(4); 240-
- 25 249.
- 26
- 27 34. Bayer J, Hiscock H, Morton-Allen E, et al. Prevention of mental health problems:
- 28 rationale for a universal approach. *Archives of disease in childhood* 2007; 92(1); 34-
- 29 38.
- 30
- 31 35. Hutchings J. The Little Parent Handbook. *Children's Early Intervention Trust;*
- 32 *Bangor* 2013.
- 33
- 34 36. Eyberg S, & Robison E. Conduct problem behaviour: Standardisation of behavioural
- 35 rating. *Journal of Clinical Child and Adolescent Psychology*, 1983; 12(3); 347-354.
- 36
- 37 37. Hutchings J, Appleton P, Smith M, et al. Evaluation of two treatments for children
- 38 with severe behaviour problems: child behaviour and maternal mental health
- 39 outcomes. *Behavioural and Cognitive Psychotherapy* 2002; 30(03); 279-295.
- 40
- 41 38. Hutchings J, Lane E, & Kelly J. Comparison of two treatments for children with
- 42 severely disruptive behaviours: A four-year follow-up. *Behaviour and Cognitive*
- 43 *Psychotherapy* 2004; 32; 15-30.
- 44
- 45 39. Lane E, & Hutchings J. Benefits of a course in behavioural analysis for health
- 46 visitors. *British Journal of Nursing* 2002; 11(10); 702-714.
- 47
- 48 40. Yardley L, Osmond A, Hare J, et al. Introduction to the LifeGuide: software
- 49 facilitating the development of interactive behaviour change internet interventions.
- 50 *Persuasive technology and digital behaviour intervention symposium*; Edinburgh: GB
- 51 2009.
- 52
- 53
- 54
- 55
- 56
- 57
- 58
- 59
- 60

- 1  
2  
3 41. Hare J, Osmond A, Yang Y, et al. LifeGuide: A platform for performing web-based  
4 behavioural interventions, *Web-Science: Society On-Line* 2009; 18-20.
- 5  
6 42. Cooper J, Heron T, & Heward W. Applied Behaviour Analysis (2<sup>nd</sup> ed.). *Upper*  
7 *Saddle River: NJ* 2007.
- 8  
9 43. Robinson E, & Eyberg S. The dyadic parent-child interaction coding system:  
10 Standardization and validation. *Journal of Consulting and Clinical Psychology*  
11 1981; 49(2); 245.
- 12  
13 44. Aspland H, & Gardner F. Observational measures of parent-child interaction: An  
14 introductory review. *Child and Adolescent Mental Health* 2003; 8(3); 136-143.
- 15  
16 45. Eames C, Daley D, Hutchings J. et al. C. The impact of group leaders' behaviour on  
17 parents acquisition of key parenting skills during parent training. *Behaviour Research*  
18 *and Therapy* 2012; 48(12); 1221-1226.
- 19  
20 46. Arnold D, O'Leary S, Wolff L, et al. The Parenting Scale: A measure of  
21 dysfunctional parenting in discipline situations. *Psychological Assessment* 1993; 5(2);  
22 137-144.
- 23  
24 47. Johnston C, & Mash E. A measure of parental satisfaction and efficacy. *Journal of*  
25 *Clinical Child Psychology* 1981; 18(2); 167-175.
- 26  
27 48. Ohan J, Leung D, & Johnston C. The Parenting Sense of Competence scale: Evidence  
28 of a stable factor structure and validity. *Canadian Journal of Behavioural* 2000;  
29 32(4); 251.
- 30  
31 49. Goldberg D. Manual of the General Health Questionnaire. Windsor: England 1978.
- 32  
33 50. Huppert F, Walters D, Day N, et al. The factor structure of the General Health  
34 Questionnaire (GHQ-30). A reliability study on 6317 community residents. *The*  
35 *British Journal of Psychiatry* 1989; 155(2); 178-185.
- 36  
37 51. Jackson C. The general health questionnaire. *Occupational medicine* 2007; 57(1); 79.
- 38  
39 52. Hutchings J, Bywater T, Williams M, et al. Improvements in maternal depression as  
40 a mediator of child behaviour change. *Psychology* 2012; 3(09); 795.
- 41  
42 53. Hutchings J. The personal and parental characteristics of preschool children referred  
43 to a child and family mental health service and their relation to treatment  
44 outcome (Doctoral dissertation, University of Wales) 1996.
- 45  
46 54. Sterne J, White I, Carlin J, et al. Multiple imputation for missing data in  
47 epidemiological and clinical research: potential and pitfalls. *Bmj*, 2009; 338, b2393.
- 48  
49 55. Ary D, Glang A, & Irvine B. The benefits, science and persuasive technology of  
50 successful eHealth behavioural interventions: Effective use of evidence-based  
51 scientific techniques to change health behaviour. ORCAS 2012.
- 52  
53  
54  
55  
56  
57  
58  
59  
60

1  
2  
3  
4  
5  
6  
7  
8  
9  
10  
11  
12  
13  
14  
15  
16  
17  
18  
19  
20  
21  
22  
23  
24  
25  
26  
27  
28  
29  
30  
31  
32  
33  
34  
35  
36  
37  
38  
39  
40  
41  
42  
43  
44  
45  
46  
47  
48  
49  
50  
51  
52  
53  
54  
55  
56  
57  
58  
59  
60

Figure legend: Participant flow chart

For peer review only

1  
2  
3  
4  
5  
6  
7  
8  
9  
10  
11  
12  
13  
14  
15  
16  
17  
18  
19  
20  
21  
22  
23  
24  
25  
26  
27  
28  
29  
30  
31  
32  
33  
34  
35  
36  
37  
38  
39  
40  
41  
42  
43  
44  
45  
46  
47  
48  
49  
50  
51  
52  
53  
54  
55  
56  
57  
58  
59  
60

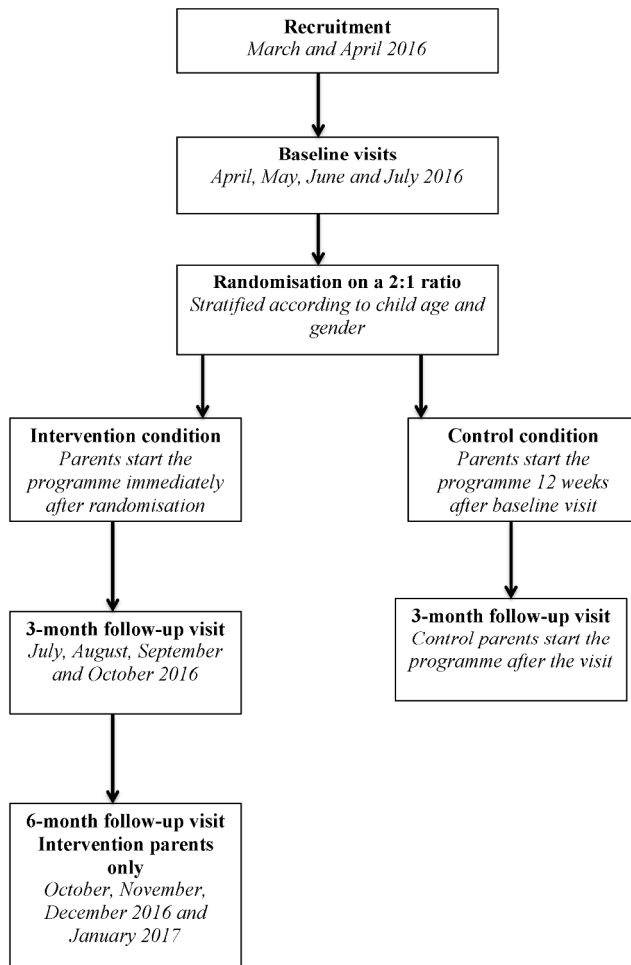

Participant flow chart

209x297mm (300 x 300 DPI)



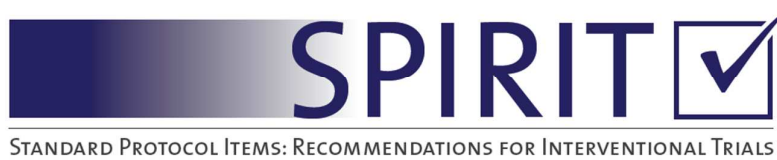

SPIRIT 2013 Checklist: Recommended items to address in a clinical trial protocol and related documents\*

| Section/item                      | Item No | Description                                                                                                                                                                                                                                                                                                                               |
|-----------------------------------|---------|-------------------------------------------------------------------------------------------------------------------------------------------------------------------------------------------------------------------------------------------------------------------------------------------------------------------------------------------|
| <b>Administrative information</b> |         |                                                                                                                                                                                                                                                                                                                                           |
| Title                             | 1       | Descriptive title identifying the study design, population, interventions, and, if applicable, trial acronym ( <a href="#">page 1</a> )                                                                                                                                                                                                   |
| Trial registration                | 2a      | Trial identifier and registry name. If not yet registered, name of intended registry ( <a href="#">page 3</a> )                                                                                                                                                                                                                           |
|                                   | 2b      | All items from the World Health Organization Trial Registration Data Set ( <a href="#">not applicable</a> )                                                                                                                                                                                                                               |
|                                   | 3       | Date and version identifier ( <a href="#">page 1</a> )                                                                                                                                                                                                                                                                                    |
| Funding                           | 4       | Sources and types of financial, material, and other support ( <a href="#">page 1</a> )                                                                                                                                                                                                                                                    |
| Roles and responsibilities        | 5a      | Names, affiliations, and roles of protocol contributors ( <a href="#">page 1</a> )                                                                                                                                                                                                                                                        |
|                                   | 5b      | Name and contact information for the trial sponsor ( <a href="#">page 1</a> )                                                                                                                                                                                                                                                             |
|                                   | 5c      | Role of study sponsor and funders, if any, in study design; collection, management, analysis, and interpretation of data; writing of the report; and the decision to submit the report for publication, including whether they will have ultimate authority over any of these activities ( <a href="#">page 22</a> )                      |
|                                   | 5d      | Composition, roles, and responsibilities of the coordinating centre, steering committee, endpoint adjudication committee, data management team, and other individuals or groups overseeing the trial, if applicable (see Item 21a for data monitoring committee) ( <a href="#">not applicable – all work carried out by the authors</a> ) |
| <b>Introduction</b>               |         |                                                                                                                                                                                                                                                                                                                                           |
| Background and rationale          | 6a      | Description of research question and justification for undertaking the trial, including summary of relevant studies (published and unpublished) examining benefits and harms for each intervention ( <a href="#">pages 3 – 7</a> )                                                                                                        |
|                                   | 6b      | Explanation for choice of comparators ( <a href="#">page 19</a> )                                                                                                                                                                                                                                                                         |
| Objectives                        | 7       | Specific objectives or hypotheses ( <a href="#">pages 7–8</a> )                                                                                                                                                                                                                                                                           |

1  
2  
3  
4  
5  
6  
7  
8  
9  
10  
11  
12  
13  
14  
15  
16  
17  
18  
19  
20  
21  
22  
23  
24  
25  
26  
27  
28  
29  
30  
31  
32  
33  
34  
35  
36  
37  
38  
39  
40  
41  
42  
43  
44  
45  
46  
47  
48  
49  
50  
51  
52  
53  
54

Trial design 8 Description of trial design including type of trial (eg, parallel group, crossover, factorial, single group), allocation ratio, and framework (eg, superiority, equivalence, noninferiority, exploratory) (page 8)

#### Methods: Participants, interventions, and outcomes

Study setting 9 Description of study settings (eg, community clinic, academic hospital) and list of countries where data will be collected. Reference to where list of study sites can be obtained (page 8)

Eligibility criteria 10 Inclusion and exclusion criteria for participants. If applicable, eligibility criteria for study centres and individuals who will perform the interventions (eg, surgeons, psychotherapists) (page 9)

Interventions 11a Interventions for each group with sufficient detail to allow replication, including how and when they will be administered (pages 10–15)

11b Criteria for discontinuing or modifying allocated interventions for a given trial participant (eg, drug dose change in response to harms, participant request, or improving/worsening disease) (no criteria for discontinuing treatment)

11c Strategies to improve adherence to intervention protocols, and any procedures for monitoring adherence (eg, drug tablet return, laboratory tests) Not applicable

11d Relevant concomitant care and interventions that are permitted or prohibited during the trial Not applicable

Outcomes 12 Primary, secondary, and other outcomes, including the specific measurement variable (eg, systolic blood pressure), analysis metric (eg, change from baseline, final value, time to event), method of aggregation (eg, median, proportion), and time point for each outcome. Explanation of the clinical relevance of chosen efficacy and harm outcomes is strongly recommended (pages 15-18)

Participant timeline 13 Time schedule of enrolment, interventions (including any run-ins and washouts), assessments, and visits for participants. A schematic diagram is highly recommended (see Figure) (insert figure on page 20)

Sample size 14 Estimated number of participants needed to achieve study objectives and how it was determined, including clinical and statistical assumptions supporting any sample size calculations (page 19)

Recruitment 15 Strategies for achieving adequate participant enrolment to reach target sample size (pages 9-10)

#### Methods: Assignment of interventions (for controlled trials)

Allocation:

|    |                |     |                                                                                   |
|----|----------------|-----|-----------------------------------------------------------------------------------|
| 1  |                |     |                                                                                   |
| 2  | Sequence       | 16a | Method of generating the allocation sequence (eg, computer-                       |
| 3  | generation     |     | generated random numbers), and list of any factors for stratification.            |
| 4  |                |     | To reduce predictability of a random sequence, details of any planned             |
| 5  |                |     | restriction (eg, blocking) should be provided in a separate document              |
| 6  |                |     | that is unavailable to those who enrol participants or assign                     |
| 7  |                |     | interventions ( <a href="#">pages 19-20</a> )                                     |
| 8  |                |     |                                                                                   |
| 9  | Allocation     | 16b | Mechanism of implementing the allocation sequence (eg, central                    |
| 10 | concealment    |     | telephone; sequentially numbered, opaque, sealed envelopes),                      |
| 11 | mechanism      |     | describing any steps to conceal the sequence until interventions are              |
| 12 |                |     | assigned ( <a href="#">pages 19-20</a> )                                          |
| 13 |                |     |                                                                                   |
| 14 | Implementation | 16c | Who will generate the allocation sequence, who will enrol participants,           |
| 15 |                |     | and who will assign participants to interventions ( <a href="#">pages 19-20</a> ) |
| 16 |                |     |                                                                                   |
| 17 | Blinding       | 17a | Who will be blinded after assignment to interventions (eg, trial                  |
| 18 | (masking)      |     | participants, care providers, outcome assessors, data analysts), and              |
| 19 |                |     | how ( <a href="#">page 20</a> )                                                   |
| 20 |                |     |                                                                                   |
| 21 |                | 17b | If blinded, circumstances under which unblinding is permissible, and              |
| 22 |                |     | procedure for revealing a participant's allocated intervention during             |
| 23 |                |     | the trial ( <a href="#">page 20</a> )                                             |
| 24 |                |     |                                                                                   |
| 25 |                |     |                                                                                   |
| 26 |                |     |                                                                                   |

### Methods: Data collection, management, and analysis

|    |                 |     |                                                                                       |
|----|-----------------|-----|---------------------------------------------------------------------------------------|
| 27 |                 |     |                                                                                       |
| 28 | Data collection | 18a | Plans for assessment and collection of outcome, baseline, and other                   |
| 29 | methods         |     | trial data, including any related processes to promote data quality (eg,              |
| 30 |                 |     | duplicate measurements, training of assessors) and a description of                   |
| 31 |                 |     | study instruments (eg, questionnaires, laboratory tests) along with                   |
| 32 |                 |     | their reliability and validity, if known. Reference to where data                     |
| 33 |                 |     | collection forms can be found, if not in the protocol ( <a href="#">pages 18-19</a> ) |
| 34 |                 |     |                                                                                       |
| 35 |                 | 18b | Plans to promote participant retention and complete follow-up,                        |
| 36 |                 |     | including list of any outcome data to be collected for participants who               |
| 37 |                 |     | discontinue or deviate from intervention protocols ( <a href="#">page 18</a> )        |
| 38 |                 |     |                                                                                       |
| 39 | Data            | 19  | Plans for data entry, coding, security, and storage, including any                    |
| 40 | management      |     | related processes to promote data quality (eg, double data entry;                     |
| 41 |                 |     | range checks for data values). Reference to where details of data                     |
| 42 |                 |     | management procedures can be found, if not in the protocol ( <a href="#">pages</a>    |
| 43 |                 |     | <a href="#">18-19</a> )                                                               |
| 44 |                 |     |                                                                                       |
| 45 | Statistical     | 20a | Statistical methods for analysing primary and secondary outcomes.                     |
| 46 | methods         |     | Reference to where other details of the statistical analysis plan can be              |
| 47 |                 |     | found, if not in the protocol ( <a href="#">page 20</a> )                             |
| 48 |                 |     |                                                                                       |
| 49 |                 | 20b | Methods for any additional analyses (eg, subgroup and adjusted                        |
| 50 |                 |     | analyses) ( <a href="#">page 20</a> )                                                 |
| 51 |                 |     |                                                                                       |
| 52 |                 | 20c | Definition of analysis population relating to protocol non-adherence                  |
| 53 |                 |     | (eg, as randomised analysis), and any statistical methods to handle                   |
| 54 |                 |     | missing data (eg, multiple imputation) ( <a href="#">page 20</a> )                    |
| 55 |                 |     |                                                                                       |
| 56 |                 |     |                                                                                       |
| 57 |                 |     |                                                                                       |
| 58 |                 |     |                                                                                       |
| 59 |                 |     |                                                                                       |
| 60 |                 |     |                                                                                       |

**Methods: Monitoring**

- 1  
2  
3  
4  
5  
6  
7  
8  
9  
10  
11  
12  
13  
14  
15  
16  
17  
18  
19  
20  
21  
22  
23  
24
- |                 |     |                                                                                                                                                                                                                                                                                                                                                             |
|-----------------|-----|-------------------------------------------------------------------------------------------------------------------------------------------------------------------------------------------------------------------------------------------------------------------------------------------------------------------------------------------------------------|
| Data monitoring | 21a | Composition of data monitoring committee (DMC); summary of its role and reporting structure; statement of whether it is independent from the sponsor and competing interests; and reference to where further details about its charter can be found, if not in the protocol. Alternatively, an explanation of why a DMC is not needed <b>Not applicable</b> |
|                 | 21b | Description of any interim analyses and stopping guidelines, including who will have access to these interim results and make the final decision to terminate the trial <b>Not applicable</b>                                                                                                                                                               |
| Harms           | 22  | Plans for collecting, assessing, reporting, and managing solicited and spontaneously reported adverse events and other unintended effects of trial interventions or trial conduct <b>Not applicable</b>                                                                                                                                                     |
| Auditing        | 23  | Frequency and procedures for auditing trial conduct, if any, and whether the process will be independent from investigators and the sponsor <b>(process will not be independent from Bangor University)</b>                                                                                                                                                 |

**Ethics and dissemination**

- 25  
26  
27  
28  
29  
30  
31  
32  
33  
34  
35  
36  
37  
38  
39  
40  
41  
42  
43  
44  
45  
46  
47  
48  
49  
50  
51  
52  
53  
54  
55  
56  
57  
58  
59  
60
- |                          |     |                                                                                                                                                                                                                                                                                                                         |
|--------------------------|-----|-------------------------------------------------------------------------------------------------------------------------------------------------------------------------------------------------------------------------------------------------------------------------------------------------------------------------|
| Research ethics approval | 24  | Plans for seeking research ethics committee/institutional review board (REC/IRB) approval <b>(pages 2-3)</b>                                                                                                                                                                                                            |
| Protocol amendments      | 25  | Plans for communicating important protocol modifications (eg, changes to eligibility criteria, outcomes, analyses) to relevant parties (eg, investigators, REC/IRBs, trial participants, trial registries, journals, regulators) <b>(authors will contact relevant parties if any changes to protocol should occur)</b> |
| Consent or assent        | 26a | Who will obtain informed consent or assent from potential trial participants or authorised surrogates, and how (see Item 32) <b>(pages 9-10)</b>                                                                                                                                                                        |
|                          | 26b | Additional consent provisions for collection and use of participant data and biological specimens in ancillary studies, if applicable <b>Not applicable</b>                                                                                                                                                             |
| Confidentiality          | 27  | How personal information about potential and enrolled participants will be collected, shared, and maintained in order to protect confidentiality before, during, and after the trial <b>(all data will remain confidential before, during and after the trial)</b>                                                      |
| Declaration of interests | 28  | Financial and other competing interests for principal investigators for the overall trial and each study site <b>(page 22)</b>                                                                                                                                                                                          |
| Access to data           | 29  | Statement of who will have access to the final trial dataset, and disclosure of contractual agreements that limit such access for investigators <b>(only the authors will have access to the data)</b>                                                                                                                  |

|    |                   |     |                                                                              |
|----|-------------------|-----|------------------------------------------------------------------------------|
| 1  |                   |     |                                                                              |
| 2  | Ancillary and     | 30  | Provisions, if any, for ancillary and post-trial care, and for               |
| 3  | post-trial care   |     | compensation to those who suffer harm from trial participation <b>Not</b>    |
| 4  |                   |     | <b>applicable</b>                                                            |
| 5  |                   |     |                                                                              |
| 6  | Dissemination     | 31a | Plans for investigators and sponsor to communicate trial results to          |
| 7  | policy            |     | participants, healthcare professionals, the public, and other relevant       |
| 8  |                   |     | groups (eg, via publication, reporting in results databases, or other        |
| 9  |                   |     | data sharing arrangements), including any publication restrictions           |
| 10 |                   |     | <b>(pages 21-22)</b>                                                         |
| 11 |                   |     |                                                                              |
| 12 |                   | 31b | Authorship eligibility guidelines and any intended use of professional       |
| 13 |                   |     | writers <b>Not applicable</b>                                                |
| 14 |                   |     |                                                                              |
| 15 |                   | 31c | Plans, if any, for granting public access to the full protocol, participant- |
| 16 |                   |     | level dataset, and statistical code <b>No plans</b>                          |
| 17 |                   |     |                                                                              |
| 18 |                   |     |                                                                              |
| 19 | <b>Appendices</b> |     |                                                                              |
| 20 |                   |     |                                                                              |
| 21 | Informed consent  | 32  | Model consent form and other related documentation given to                  |
| 22 | materials         |     | participants and authorised surrogates <b>Uploaded with submission</b>       |
| 23 |                   |     |                                                                              |
| 24 | Biological        | 33  | Plans for collection, laboratory evaluation, and storage of biological       |
| 25 | specimens         |     | specimens for genetic or molecular analysis in the current trial and for     |
| 26 |                   |     | future use in ancillary studies, if applicable <b>Not applicable</b>         |
| 27 |                   |     |                                                                              |

---

28 \*It is strongly recommended that this checklist be read in conjunction with the SPIRIT 2013  
 29 Explanation & Elaboration for important clarification on the items. Amendments to the  
 30 protocol should be tracked and dated. The SPIRIT checklist is copyrighted by the SPIRIT  
 31 Group under the Creative Commons "[Attribution-NonCommercial-NoDerivs 3.0 Unported](https://creativecommons.org/licenses/by-nc-nd/3.0/)"  
 32 license.  
 33  
 34  
 35  
 36  
 37  
 38  
 39  
 40  
 41  
 42  
 43  
 44  
 45  
 46  
 47  
 48  
 49  
 50  
 51  
 52  
 53  
 54  
 55  
 56  
 57  
 58  
 59  
 60

# BMJ Open

## Evaluation of an online parenting programme based on 'The Little Parent Handbook': Study protocol for a pilot randomised controlled trial

|                                 |                                                                                                                                                       |
|---------------------------------|-------------------------------------------------------------------------------------------------------------------------------------------------------|
| Journal:                        | <i>BMJ Open</i>                                                                                                                                       |
| Manuscript ID                   | bmjopen-2016-013381.R2                                                                                                                                |
| Article Type:                   | Protocol                                                                                                                                              |
| Date Submitted by the Author:   | 26-Jan-2017                                                                                                                                           |
| Complete List of Authors:       | Owen, Dawn; Bangor University, Psychology<br>Griffith, Nia; Bangor University, Psychology<br>Hutchings, Judy; Bangor University, School of Psychology |
| <b>Primary Subject Heading</b>: | Evidence based practice                                                                                                                               |
| Secondary Subject Heading:      | Public health                                                                                                                                         |
| Keywords:                       | Clinical trials < THERAPEUTICS, STATISTICS & RESEARCH METHODS, Child & adolescent psychiatry < PSYCHIATRY                                             |
|                                 |                                                                                                                                                       |

SCHOLARONE™  
Manuscripts

1  
2  
3 **Title:** Evaluation of an online parenting programme based on ‘The Little Parent Handbook’:  
4  
5 Study protocol for a pilot randomised controlled trial  
6  
7  
8

9  
10 **Authors:** Dawn Adele Owen, Nia Griffith, Judy Hutchings  
11

12 **Author details:**

13  
14 Centre for Evidence Based Early Intervention, School of Psychology, Nantlle Building,  
15

16 Normal Site, Bangor University, Bangor, Gwynedd, LL57 2PZ, UK (01248 383 758).  
17

18 Email: [dawn.a.owen@bangor.a.uk](mailto:dawn.a.owen@bangor.a.uk)  
19  
20

21  
22  
23 School of Psychology, Wheldon Building, Room 113, Bangor University, Bangor, Gwynedd,  
24  
25 LL57 2PZ, UK.  
26

27 Email: [n.griffith@bangor.ac.uk](mailto:n.griffith@bangor.ac.uk)  
28  
29

30  
31  
32 Centre for Evidence Based Early Intervention, School of Psychology, Nantlle Building,  
33

34 Normal Site, Bangor University, Bangor, Gwynedd, LL57 2PZ, UK.  
35

36 Email: [j.hutchings@bangor.ac.uk](mailto:j.hutchings@bangor.ac.uk)  
37  
38  
39

40  
41 **Version 3: 19/01/2017**  
42  
43  
44

45 **Keywords:** child behaviour, online parenting programme, randomised controlled trial,  
46  
47 positive parenting, and health care services  
48  
49

50  
51  
52 **Word count:** 5,482  
53  
54  
55

56 **Trial Sponsor:** Bangor University, Brigantia Building, College Road, Bangor, LL57 2AS  
57  
58  
59  
60

## Abstract

**Introduction:** The online parenting programme based on ‘The Little Parent Handbook’ is a web-based parenting intervention for parents of children aged 3-8 with an interest in positive parenting. The programme focuses on strengthening parent-child relationships through encouraging positive child behaviour. This trial will evaluate whether the intervention is effective in increasing the use of positive parenting strategies outlined in the programme using parent report and blind observation.

**Methods and analysis:** This is a pilot randomised controlled trial with intervention and wait-list control conditions. The intervention is a ten-week online parenting programme to promote positive parent-child relations by teaching core social learning theory principles that encourage positive child behaviour, primarily through the use of praise and rewards. Health visitors and school nurses will circulate a recruitment poster to parents of children aged 3-8 years on their current caseloads. Recruitment posters will also be distributed via local primary schools and nurseries. Parents recruited to the trial will be randomised on a 2:1 ratio to intervention or wait-list control conditions (stratified according to child gender and age). The primary outcome measure is positive parenting as measured by a behavioural observation of parent-child interactions using the Dyadic Parent-Child Interaction Coding System [1]. Secondary outcomes include parental report measures of child behaviour, self-reported parental sense of competence, parenting behaviour and parental mental health. Data will be collected at baseline and three months later (post-intervention) for all participants and six months post-baseline for the intervention group only. ANCOVA will be the main statistical method used.

**Ethics and dissemination:** The trial has received ethical approval from the NHS Betsi Cadwaladr University Health Board Ethics Committee (REC) and the School of Psychology,



1  
2  
3 Bangor University REC (15/WA/0463). Publications of all outcomes will be in peer-  
4  
5 reviewed journals and conference presentations.  
6

7 **Trial registration:** Current Controlled Trials ISRCTN89370147 (May 5th 2016).  
8  
9

### 10 11 12 **Strengths and limitations**

- 14 • This is a randomised Controlled Trial with a wait-list control group.
- 15  
16 • The behavioural observations incorporate inter-rater reliability (20% of all  
17 observations at the separate time points).
- 18  
19 • Once randomised, intervention parents start the online programme immediately thus  
20 reducing the amount of time spent waiting for the intervention.
- 21  
22 • A limitation of this study is parents are required to log in each week and engage with  
23 the programme, this may result in some parents not fully engaging and the potential  
24 loss of follow-up data.
- 25  
26 • Due to time and funding constraints, this trial aims to enroll sixty parents, which is a  
27 fairly small sample size.
- 28  
29 • Funding and time constraints do not allow for a longer-term follow-up.  
30  
31  
32  
33  
34  
35  
36  
37  
38  
39  
40

### 41 **Background**

42  
43 Minor child problem behaviours can develop into more significant problems unless addressed  
44 while children are still young [2] and there are high costs associated with child mental health  
45 and behavioural problems [3]. Conduct problems have a significant impact on children's  
46 functioning and quality of life [4] with up to 50% of children and young people with conduct  
47 disorder developing antisocial personality disorder [5, 4]. This highlights the importance of  
48 providing early universal support to parents to avoid the small behavioural challenges faced  
49 by all parents from progressing into more costly ones.  
50  
51  
52  
53  
54  
55  
56  
57  
58  
59  
60

1  
2  
3 Children who are at risk of poor outcomes, including impairments in social, emotional and  
4 educational functioning [6], often experience harsh and inconsistent parenting from parents  
5 who show little positive parental involvement [7]. Problematic parenting strategies can be  
6 addressed through teaching positive parenting skills to target such child behaviour problems  
7 and achieve positive outcomes [8, 9, 10, 11]. These positive parenting skills that are  
8 associated with positive child outcomes are well established and include play, praise, reward,  
9 and positive affect [8].  
10  
11  
12  
13  
14  
15  
16  
17  
18  
19

20  
21 A successful intervention for parents of children with significant behavioural difficulties [10]  
22 used mediator analysis to demonstrate that the mechanism for change in child behaviour was  
23 change in parental behaviour [12]. Similarly, teaching positive parental strategies has been  
24 shown to increase positive parenting style as measured by direct observation of parent-child  
25 interactions [13]. Whilst these studies have focused on programmes for parents of children  
26 with, or at risk of, significant problems, there is less evidence for the benefits of parenting  
27 programmes for parents in general. Public policy recognises the need for early intervention  
28 and support for families, but it is not universally available and remains “patchy” [14].  
29  
30  
31  
32  
33  
34  
35  
36  
37

38 In the UK, the National Institute for Health and Care Excellence [4] identified the Incredible  
39 Years Parent Programme as a treatment for conduct disorder [15], and this evidence-based  
40 programme was introduced to North West Wales through the NHS Child and Adolescent  
41 Mental Health Service in the 1990s (CAMHS) [15]. Numerous Randomised Controlled Trials  
42 have shown significant improvements for child behaviour following the intervention [10, 16].  
43  
44 However, these programmes are not readily available. The Flying Start initiative offers  
45 parenting programmes on an annual basis to families living in disadvantages areas with a  
46 child aged four years or younger [17], and may not be accessible to some families due to  
47 barriers [18] for example, the inconvenience of travel to the clinical setting or organising  
48  
49  
50  
51  
52  
53  
54  
55  
56  
57  
58  
59  
60

1  
2  
3 childcare arrangements for groups scheduled during weekday hours can be particularly  
4 burdensome [19]. Additionally, these programmes can be costly as an effective analysis of  
5 the Incredible Years basic parenting programme showed that the intervention improved  
6 children's behaviour at a cost of £1344 per child [20].  
7  
8  
9  
10

11  
12  
13  
14 Challenges in the availability of parenting programmes has resulted in health visitors and  
15 school nurses supporting the majority of families in the UK with children at significant risk  
16 of poor outcomes, reducing their ability to provide adequate support to all families. A survey  
17 of health visitors and school nurses reported that 53% of health visitors saw between 21-50,  
18 and 46% of school nurses saw between 50-99 children with emotional or behavioural  
19 problems each week [21]. A review of parental and professional perceptions of barriers to  
20 parenting interventions [18] highlighted five challenges for both parents and facilitators; (1)  
21 situational barriers, (2) psychological barriers including fear of being criticised or stigmatised  
22 [22], (3) lack of information/misconception about services, (4) availability of services and (5)  
23 poor interagency collaboration. These barriers suggest there could be benefits from  
24 alternative modes of programme delivery including behavioural interventions delivered  
25 online [23].  
26  
27  
28  
29  
30  
31  
32  
33  
34  
35  
36  
37  
38  
39  
40  
41  
42

43 Technology has the potential to enhance parental engagement, teach key parenting skills,  
44 reduce the cost burden associated with group and one-to-one interventions, alleviate  
45 pressures on services, particularly those delivered by health visitors and school nurses, and  
46 offer more flexible access [23, 24, 25]. Access to technology is now feasible for many  
47 parents due to increased availability of internet access [26]. The number of households with  
48 computers increased from 8% to 60% between 1984 and 2003 in the US, and in the UK by  
49 2015, 86% of households had internet access [27]. The majority of parents (75%) now use  
50  
51  
52  
53  
54  
55  
56  
57  
58  
59  
60

1  
2  
3 social media to obtain parent-related information [28] with over eight million people visiting  
4  
5 an online parenting information and advice website every month [29].  
6  
7

8  
9  
10 Although as yet limited in number, web-based programmes for behaviour change (including  
11  
12 weight loss and alcohol reduction) have achieved positive outcomes [30, 31], suggesting that  
13  
14 technology can be an effective means of providing behaviour change advice and support.

15  
16 Similarly, there is evidence demonstrating increased positive parenting following web-based  
17  
18 interventions [32, 33]. Parents of children aged between 3-12 years with conduct disorder  
19  
20 who accessed an online parenting programme, reported less use of harsh parenting and more  
21  
22 use of positive praise compared to wait-list control parents [33], and these findings were  
23  
24 maintained at the six-month follow-up. However, evidence in this field is currently limited  
25  
26 and universal programmes need more evidence to demonstrate effectiveness with families  
27  
28 who are not necessarily experiencing significant levels of child problem behaviours. Bayer  
29  
30 and colleagues highlighted the importance of offering parental support universally (1) so as  
31  
32 not to stigmatise at-risk populations and (2) to prevent missing early signs of problems for  
33  
34 families not classified as at-risk [34].  
35  
36  
37  
38  
39

40 Web based interventions allow parents to access support at home at a time most convenient  
41  
42 for their individual family circumstances, eliminating one of the barriers associated with  
43  
44 more traditional intervention approaches. The internet allows access to advice without having  
45  
46 to seek referral or further advice from health care professionals. This could allow  
47  
48 professionals, such as health visitors and school nurses, more time and resources to target  
49  
50 clinical (or identified at-risk) populations with more individualised interventions. Providing  
51  
52 parents access to online advice and support could increase parental understanding of how to  
53  
54 promote positive child development and potentially prevent the development of child  
55  
56  
57  
58  
59  
60

1  
2  
3 behaviour problems. Providing positive parenting support in general could avoid the  
4  
5 intergenerational transfer of poor parenting practices [14].  
6  
7  
8

### 9 10 **Rationale**

11 The aim of the web based parenting programme, based on ‘The Little Parent Handbook’ [35],  
12  
13 is to provide information and activities based on core social learning theory principles  
14  
15 associated with positive parenting practices and good child outcomes to parents of children  
16  
17 aged 3-8 years. The study will explore the delivery of the programme, parental satisfaction  
18  
19 and engagement with the programme and whether it is effective in demonstrating increased  
20  
21 use of positive parental practices in parents of children with a wide age range and varying  
22  
23 behavioural patterns.  
24  
25  
26  
27

### 28 29 **Aims and Objectives**

30 The aim of this trial is to conduct a pilot randomised controlled trial (RCT) on the  
31  
32 effectiveness of an online parenting programme, for parents of children aged 3-8 years who  
33  
34 would like to learn more about positive parenting by comparing outcomes for intervention  
35  
36 and wait-list control groups.  
37  
38  
39

40  
41 The key objectives are to establish whether the programmes successfully engages and retains  
42  
43 parents; whether the programme produces statistically significant increases in positive  
44  
45 parenting as observed in a parent-child observation when compared to wait-list control  
46  
47 parents; and to determine whether the online programme produces any changes in secondary  
48  
49 outcomes (parent-reported child behaviour, parent self-reported sense of competence,  
50  
51 behaviour and mental health). The study hypotheses are:  
52  
53  
54  
55  
56  
57  
58  
59  
60

- i. the online parenting programme will lead to significant increases in positive parenting strategies as displayed in the behavioural observation coded using Dyadic Parent-Child Interaction Coding System [1]
- ii. the online programme will significantly increase positive behaviours and mental health of parents, including self-reported parenting skills, parental sense of competence and parental mental health
- iii. the online programme will lead to reduction in parent-reported levels of child problem behaviour as reported using the Eyberg Child Behaviour Inventory [36]

## Methods/Design

### Trial design

This pilot RCT will explore the effectiveness of an online parenting programme. Parents of children aged 3-8 years who would like to learn more about positive parenting will be randomly allocated to the intervention condition with immediate access to the programme or to a 3-month wait-list control group on a 2:1 ratio. Self-report and observational data will be collected in parents' homes during home visits and parents will access the programme at home.

### Eligibility criteria

To be eligible for the study parents must have a child aged between 3-8 years, be able to understand English (as the programme is only currently available in English) and be able to access the internet on a PC, laptop, iPad or tablet. The software does not yet support smartphones. Parents who are currently receiving support from services are also invited to participate (they will be asked to record which services they are receiving and the duration).

1  
2  
3 Individuals will be excluded from the study if a parents does not have a child aged between  
4  
5 3-8 years, does not understand English and does not have access to the internet.  
6  
7

### 8 9 **Recruitment**

10 Health visitors and school nurses in Gwynedd and Anglesey (North-West Wales) will  
11  
12 approach parents of children aged 3-8 years on their own caseloads and describe the online  
13  
14 programme and the research trial. If parents decide that they might want to sign up for the  
15  
16 programme and the research trial. If parents decide that they might want to sign up for the  
17  
18 study, they will be asked by the health visitor/school nurse to complete a note of interest  
19  
20 form, that will be sent to the research office at Bangor University, giving consent for a  
21  
22 member of the research team to contact the parent.  
23  
24

25  
26  
27 On receipt of the note of interest form, a member of the research team will contact the parent  
28  
29 to arrange a convenient time to visit and discuss the project further. The researcher will go  
30  
31 through the information sheet with the parent during this home visit and ensure that any  
32  
33 questions are answered. If the parent is happy to continue, the researcher will obtain informed  
34  
35 consent from the parent to participate in the study. Only when consent has been obtained will  
36  
37 the researcher proceed to ask the parent to fill out the self-report measures and take part in a  
38  
39 30-minute behavioural observation of parent-child interaction.  
40  
41  
42  
43  
44

45 In addition to health visitors and school nurses approaching parents on their caseloads,  
46  
47 recruitment posters will be distributed in primary schools and nurseries in Gwynedd,  
48  
49 Anglesey, Conwy and Denbighshire. An e-mail address and a contact telephone number will  
50  
51 be provided on the recruitment poster so that interested parents can contact the research team  
52  
53 directly. Parents will either be sent a detailed information sheet via e-mail or the researcher  
54  
55 will discuss the research in depth over the telephone. If parents would still like to participate,  
56  
57  
58  
59  
60

1  
2  
3 arrangements will then be made for a home visit to discuss the study further. Similarly,  
4  
5 parents who hear about the study through word of mouth can contact the research team for  
6  
7 further information regarding the trial.  
8  
9

10  
11 It is expected that both forms of recruitment (poster and health visitor/ school nurse) will  
12  
13 attract parents from varying socioeconomic backgrounds who are experiencing varying levels  
14  
15 of child problem behaviour. For the purpose of this pilot trial, baseline characteristics of all  
16  
17 parents will be reported and compared with the population as a whole. Additionally, the  
18  
19 percentage of parents recruited from each source will be reported and their characteristics  
20  
21 compared in order to explore the effects of the intervention for the whole sample.  
22  
23  
24  
25  
26

### 27 **Intervention**

28  
29 Trials conducted by Hutchings and colleagues during the 1990s [37, 38] with parents and  
30  
31 health visitors demonstrated positive outcomes from teaching effective behavioural strategies  
32  
33 to parents of children with challenging behavior for both clinically referred and pre-school  
34  
35 prevention populations. Significant overall improvements were found for intervention  
36  
37 families on measures of child behaviour, parenting practices and maternal mental health [37,  
38  
39 39]. As part of these trials intervention parents were provided with help sheets that were  
40  
41 subsequently published as 'The Little Parent Handbook' [35]. These trials were multi-  
42  
43 component trials and so it is difficult to establish the true extent of the effectiveness of the  
44  
45 parent help-sheets, however they contained the evidence based behavioural principles on  
46  
47 which the interventions were based.  
48  
49  
50

51  
52  
53 The LifeGuide software, developed at the University of Southampton [40], was used in the  
54  
55 creation of the online parenting programme. The aim of LifeGuide is to continuously  
56  
57  
58  
59  
60



1  
2  
3 develop, evaluate and disseminate a set of tools that will allow researchers to flexibly create  
4 and modify online behaviour change interventions [41]. LifeGuide software allows  
5  
6 researchers to deliver behavioural principles both through programme delivery (text message  
7 prompts etc.) and programme content (The Little Parent Handbook).  
8  
9

10  
11  
12  
13  
14 Features of the online parenting programme include automated feedback based on individual  
15 performance, online praise messages for spending time with their child, text message  
16 reminders to access the next session, and multiple-choice quizzes to test knowledge. The  
17 programme also enables the tracking of individual usage data (which can be extracted into  
18 Microsoft Excel), including the number of log in, time spent on each page and the number of  
19 chapters completed.  
20  
21  
22  
23  
24  
25  
26  
27  
28

29  
30 The programme introduces evidence-based behavioural principles that have been shown to be  
31 effective in strengthening parent-child relations through encouraging positive child behaviour  
32 [42]. A small-scale feasibility study of the online parenting programme was conducted at the  
33 end of 2015 with the aim of providing user feedback prior to conducting this larger-scale  
34 RCT trial. This study had no measures and participants were not randomised, instead twenty  
35 participants were asked to complete the intervention and fill out a feedback form. Overall,  
36 feedback was very positive with the majority of participants reporting that they would  
37 recommend the programme to parents of children aged 3-8 years. Minor modifications were  
38 made based on the feedback, these include text message prompting parents to log-in to  
39 subsequent sessions, more video examples of positive parenting and the option to look back  
40 over previously completed chapters again. The intervention consists of ten chapters, eight  
41 content and two revision chapters. The topics are:  
42  
43  
44  
45  
46  
47  
48  
49  
50  
51  
52  
53  
54

- 55  
56 i. Spending special time with your child through play  
57  
58  
59  
60

- 1
- 2
- 3 ii. Encouraging good behaviour through praising
- 4
- 5 iii. Encouraging good behaviour through rewarding
- 6
- 7 iv. How to get better at giving instructions [part 1]
- 8
- 9 v. How to get better at giving instructions [part 2]
- 10
- 11 vi. Revision
- 12
- 13
- 14 vii. Ignoring problem behaviour
- 15
- 16 viii. Teaching your child new behaviours
- 17
- 18 ix. How to develop your child's language skills
- 19
- 20
- 21 x. Revision
- 22

23 Intervention parents will be provided with a link to the website and a username and  
24 password. Contact details of an administrator will be provided in case any parent requires  
25 technical support during the programme. Parents will be asked to log in and complete one  
26 chapter each week, each chapter will take approximately thirty minutes to complete. The  
27 software ensures that parents have completed each chapter before they can move on to the  
28 next one; they are not required to complete the chapter in one sitting. Log in details allow  
29 parents to access the programme as many times as they wish. The intervention has been  
30 programmed to take parents to the last page that they viewed on the next occasion that they  
31 log in to avoid parents having to start the programme from the beginning. In order to give  
32 parents sufficient time to practice the principles outlined in the individual chapters, the  
33 intervention has been programmed so that there will be a minimum five-day gap between  
34 each chapter. If parents log in before the five days have elapsed, they will be offered the  
35 opportunity to look back over previously completed chapters again.

36  
37  
38  
39  
40  
41  
42  
43  
44  
45  
46  
47  
48  
49  
50  
51  
52  
53  
54 The programme asks parents to practice the skills presented in the chapter with their child at  
55 home. Each chapter concludes with a suggested practice activity. Parents are also encouraged  
56  
57  
58  
59  
60

1  
2  
3 to keep paper records detailing their activities. Parents can also record online each week how  
4  
5 many times they have played with their child by selecting the amount of times from a drop-  
6  
7 down menu. The programme encourages parents to spend more time playing with their child  
8  
9 in order to strengthen their relationship, and they are continuously reminded to engage in this  
10  
11 activity throughout the programme both by praise messages and by being prompted to record  
12  
13 the amount of time spent playing. A praise message congratulates the parent for spending  
14  
15 time with their child if they report spending time with their child during the past week, or  
16  
17 since the last time they logged in. If parents do not report having spent time with their child  
18  
19 during the past week, a prompt message appears reminding them of the importance of this  
20  
21 activity.  
22  
23  
24  
25

26  
27 Each chapter covers an individual behavioural principle that aims to strengthen the parent-  
28  
29 child relationship. Parents read through information (or listen via an audio button if they  
30  
31 prefer) and watch video examples of positive parenting. The video clips are short in length  
32  
33 (all are less than one minute long) allowing the opportunity for multiple viewing. At the end  
34  
35 of each chapter there is a longer video and parents are asked to answer three questions based  
36  
37 on the video clip (by selecting yes or no) in order to develop their observational skills and to  
38  
39 encourage them to identify positive child behaviours. For example, at the end of chapter two  
40  
41 (praising positive behaviour) parents are prompted to watch a video of a parent giving her  
42  
43 child a specific labelled praise, and then answering three questions based on the video; (1)  
44  
45 Did the parent praise the child immediately? (2) Was the parent close to the child when  
46  
47 praising? (3) Did the parent share positive feelings when praising? A score out of three and  
48  
49 the correct answers are provided for the responses to the videos.  
50  
51  
52  
53  
54  
55  
56  
57  
58  
59  
60

1  
2  
3 Each chapter ends with a multiple-choice quiz to test parents' knowledge and understanding  
4  
5 of key principles. Parents will be given online automated feedback on their quiz scores in  
6  
7 addition to the correct answers. Parents also have an option to download and print a summary  
8  
9 sheet for each chapter.  
10

11  
12  
13  
14 Parents will be given an opportunity to receive text message prompts to help keep them on  
15  
16 track. If they would like to receive text messages, they will be asked at the beginning of the  
17  
18 programme to enter their mobile phone number. The programme is fully automated, and the  
19  
20 research team will have no contact with parents during the intervention. The centre  
21  
22 administrator can be contacted if parents require any technical assistance during the study. A  
23  
24 text message will be sent five days after the completion of a chapter informing the parent that  
25  
26 the next chapter is now available. If the parent has not logged into the programme to  
27  
28 complete the next chapter three days after it becomes available, a reminder text will be sent  
29  
30 prompting them to log in and complete the next chapter. If a parent still has not logged in,  
31  
32 weekly reminders will be sent. LifeGuide does not allow researchers to track how many  
33  
34 messages parents have received, however, researchers will calculate the number of text  
35  
36 messages each participant has received depending on the programme schedule, e.g. if a  
37  
38 parent has not logged on after three days of the chapter becoming available they will have  
39  
40 received one text message, etc. Therefore it will be possible to monitor the level of prompting  
41  
42 each participant receives.  
43  
44  
45  
46  
47  
48

49  
50 Baseline data will be collected prior to randomisation and, once it is completed, intervention  
51  
52 parents will receive a notification of their status and their log in details, whilst parents in the  
53  
54 wait-list control group will be informed that they will have access to the programme after  
55  
56 three months. Follow up data will be collected after three months regardless of whether  
57  
58  
59  
60

1  
2  
3 intervention parents have completed the programme. Once post-intervention data has been  
4  
5 collected, control group parents will receive their log in details for the programme. On  
6  
7 completion of both baseline and follow-up visits, families will receive a children's book as a  
8  
9 thank you for their time. On completion of all measures, all parents will receive a copy of  
10  
11 'The Little Parent Handbook'. Data collection will begin in April 2016 and end in February  
12  
13 2017.  
14  
15

### 16 17 18 **Primary measure** 19

20  
21 The primary outcome is to establish whether the online parenting programme produces  
22  
23 significant changes in positive parenting practices from baseline to follow-up as recorded  
24  
25 using the DPICS. The researcher will observe the parent and child engaging in child-led play  
26  
27 for thirty minutes. This coding system was specifically designed to assess the quality of  
28  
29 parent-child social interaction [43]. The DPICS has demonstrated high inter-rater reliability  
30  
31 for parent and child behaviours,  $r = 0.67$  to  $1.0$  and  $r = 0.76$  to  $1.0$  respectively [43]. Direct  
32  
33 observation was selected as the primary outcome as direct observational methods provide a  
34  
35 more precise account of behaviour defined by the researcher and not the parent [44].  
36  
37 Additionally, this observational measure has been used in a number of previous studies at the  
38  
39 centre [10, 38, 45].  
40  
41  
42  
43  
44

45  
46 There are eight DPICS parent categories summarised in terms of positive and negative  
47  
48 parenting. Positive parenting categories comprise of direct command, labelled praise,  
49  
50 unlabelled praise and descriptive commenting/verbal labelling. Negative parenting categories  
51  
52 comprise of indirect command, questions, critical statement and negative command. No child  
53  
54 categories will be recorded; child behaviour will be measured using the parent report ECBI  
55  
56 only, as the main purpose of this study is to see whether the intervention has an affect on  
57  
58  
59  
60

1  
2  
3 parental behaviour. Observational coding is continuous and records the total frequency of  
4  
5 each category of parent behaviour for a total of thirty minutes. Inter-rater levels of reliability  
6  
7 will be assessed for 20% of all observations at all three-time points.  
8  
9

## 10 11 12 **Secondary measures**

13  
14 The following secondary outcomes will be collected at the three time points by the research  
15  
16 team for the intervention group and twice for the wait-list control group.  
17

- 18  
19 • Child behaviour as measured by the Eyberg Child Behaviour Inventory [1]. This  
20  
21 measure is a 36-item inventory completed by the parent to assess the frequency and  
22  
23 intensity of child behavioural problems for children aged 2-16 years, and has been  
24  
25 used in many previous trials including several that have been conducted at the centre  
26  
27 [10, 37]. Factor analyses of the ECBI for both children and adolescents indicate that it  
28  
29 is a uni-dimensional measure of conduct problem behaviours [36].  
30
- 31  
32 • Parenting practices as measured by the Arnold O’Leary Parenting Scale [46]. This is a  
33  
34 30-item inventory with three subscales measuring parental behaviour: laxness, over-  
35  
36 reactivity and verbosity. Responses are recorded on a seven-point scale with two  
37  
38 alternative responses to a particular parental situation. The parenting scale has been  
39  
40 shown to exhibit adequate internal validity and test-retest reliability [46] in addition to  
41  
42 demonstrating significant correlations with observational measures of child problem  
43  
44 behaviour [46].  
45
- 46  
47 • Parental confidence as measured by the Parental Sense of Competence questionnaire  
48  
49 [47]. This 17-item likert-scale questionnaire measures competence on two separate  
50  
51 dimensions: satisfaction and efficacy. The satisfaction questions measure parental  
52  
53 anxiety, motivation and frustration (for example, ‘sometimes I feel like I’m not  
54  
55 getting anything done’) and the efficacy question examine competence, capability  
56  
57  
58  
59  
60

1  
2  
3 levels and problem-solving skills (for example, 'I meet my own personal expectations  
4 for expertise in caring for my child') in relation to parenting [47]. Ohan, Leung and  
5  
6  
7  
8  
9  
10  
11  
12  
13  
14  
15  
16  
17  
18  
19  
20  
21  
22  
23  
24  
25  
26  
27  
28  
29  
30  
31  
32  
33  
34  
35  
36  
37  
38  
39  
40  
41  
42  
43  
44  
45  
46  
47  
48  
49  
50  
51  
52  
53  
54  
55  
56  
57  
58  
59  
60

levels and problem-solving skills (for example, 'I meet my own personal expectations for expertise in caring for my child') in relation to parenting [47]. Ohan, Leung and Johnston [48] replicated the factor structure of the Parenting Sense of Competence Scale produced by Johnston and Mash [47], and provided evidence that the satisfaction and efficacy scales from this measure assess distinct aspects of parenting self-esteem.

- Parental mental health as measured by the General Health Questionnaire [49]. This is a 30-item questionnaire and each item invites one of four responses in order to assess psychiatric symptoms including social dysfunction, sleeping patterns and depression [50]. The responses include 'better than usual', 'same as usual', 'less than usual' and 'much less than usual' to questions such as 'have you found everything getting on top of you?' and 'have you been getting edgy and bad tempered?' This measure was used as research has demonstrated the association between maternal mental health and child conduct problems [51]. Reliability coefficients of the questionnaire have ranged from 0.78 to 0.95 in various studies [52]. There have been several factor analyses of the GHQ-30 in relatively large community samples [50].

### **Demographic information**

Demographic information will be collected from all participants at baseline prior to randomisation. The demographic questionnaire is based on the 'Personal Development and Health Questionnaire' [53] and will include data on socioeconomic status, including poverty, parental educational level and single-parent status. The questionnaire will cover the following information:

- 1  
2  
3  
4  
5  
6  
7  
8  
9  
10  
11  
12  
13  
14  
15  
16  
17  
18  
19  
20
- Age of parent and child, gender of parent and child, child diagnosis, parent's relationship to the child (biological or non-biological parent), parent's age at birth of first child, how many children the parent has, ages of all children, parent's current relationship status, partner's relationship to the child, housing situation, employment status, income, parent's level of education and whether they have previously attended a parenting course. An additional question regarding their internet usage is also included.

### 21 **Data Collection**

22  
23  
24  
25  
26  
27  
28  
29  
30  
31  
32  
33  
34  
35  
36  
37

Members of the research team will collect parental self-report measures and observational data on parent-child interaction using the DPICS behaviour coding system, during home visits at baseline and follow-up. There is a possibility that parents will drop out of the programme before the end; nonetheless all efforts will be made to collect follow-up data. Parents will also be asked to complete a short feedback/satisfaction questionnaire at the end of the study to share their views of the programme.

38  
39  
40  
41  
42  
43  
44  
45  
46  
47  
48  
49  
50  
51  
52  
53  
54  
55

The DPICS has been used in a number of studies evaluating parenting programmes [10, 46, 52]. Research team members are already trained in DPICS coding and have reached 80% inter-rater reliability across all categories. At least two coders, to establish inter-rater reliability, will code 20% of observations at each time-point simultaneously (baseline and follow-up). Frequent practice sessions and meetings will be held to discuss any matters arising and to ensure maintenance of a minimum level of 80% reliability.

### 56 **Sample Size**



1  
2  
3 The intention is to enroll 60 parents o children aged 3-8 years (40 to intervention and 20 to  
4 wait-list control, randomised on a 2:1 ratio). Due to limited funds and time restrictions  
5 associated with recruitment and data collection, a larger sample size would be difficult to  
6 recruit within the time frame. Additionally, this is a pilot RCT with the aim of exploring  
7 initial outcomes (in terms of measures, delivery and acceptance of the programme) with a  
8 view to conducting a larger scale trial in the future. Results from this pilot trial will give  
9 researchers initial information regarding acceptability and delivery of the programme with  
10 parents of children aged 3-8 years and should be sufficient to explore initial outcomes in  
11 terms of encouragement in the use of positive parental strategies that would inform a power  
12 calculation for a larger definitive study.  
13  
14  
15  
16  
17  
18  
19  
20  
21  
22  
23  
24  
25  
26

### 27 **Randomisation**

28  
29 Once all of the data for individual parents have been collected at baseline, parents will be  
30 randomised to either the intervention or a wait-list control condition on a 2:1 ratio. This  
31 allows for the evaluation of a larger intervention sample whilst also reducing the number of  
32 parents waiting for the intervention. This design is favoured for research in this field [10]. A  
33 control condition was favoured over an alternative treatment condition as the researchers  
34 wanted to ensure that all participants received access to the intervention. The randomisation  
35 will be stratified according to child age (3-5 and 6-8 years old) and gender (male and female)  
36 using the online software ‘sealed envelope’. The centre administrative assistant will  
37 undertake the randomisation process, which will require entering the participant identification  
38 number, child age and child gender. The software will then generate the decision on whether  
39 the participant has been allocated to the intervention (group 1) or control (group 2) condition.  
40 Parents will receive a letter from the administrator informing them of their group allocation  
41 and intervention parents will receive the link to the website and their log in details with this  
42  
43  
44  
45  
46  
47  
48  
49  
50  
51  
52  
53  
54  
55  
56  
57  
58  
59  
60

1  
2  
3 letter. Control parents will be informed that they will receive their log in details upon  
4  
5 completion of the second home visit (post-intervention data).  
6  
7

8  
9  
10 *(Insert Figure 1 here)*  
11

### 12 13 14 **Blinding**

15  
16 Baseline measures will be completed prior to randomisation and parents will be asked (during  
17  
18 home visits) not to reveal their group allocation to researchers in order, as far as possible, to  
19  
20 keep the researchers blind to parent group allocation. However, some parents may reveal  
21  
22 their allocation during the first follow-up home visits. In this instance, researchers will make  
23  
24 a record of this. Due to the design of the study, it will not be possible to keep the researchers  
25  
26 blind to group allocation at the second six-month follow-up stage as they will only involve  
27  
28 intervention parents. However the key measures are parent report questionnaires and the  
29  
30 frequency based behavioural observation that incorporates inter-rater reliability. If high levels  
31  
32 of unmasking occur, a variable will be added to the analysis to control for this.  
33  
34  
35  
36  
37

### 38 39 **Statistical Analysis**

40  
41 Baseline characteristics for all parents and children will be analysed and checked for  
42  
43 differences (if any) between the intervention and wait-list control groups. Any differences  
44  
45 will be recorded and accounted for in the analysis. ANCOVA will be used as the main  
46  
47 analysis method to compare the intervention and wait-list control groups. Any missing data  
48  
49 will be treated using multiple imputation, a relatively flexible, general-purpose approach to  
50  
51 dealing with missing data [54].  
52  
53  
54  
55  
56  
57  
58  
59  
60

## Discussion

This trial will provide information on the effectiveness of an online parenting programme, an intervention designed to increase positive parenting for parents of children aged 3-8 years.

The effects of the intervention on child behaviour, parenting behaviour, parental mental health and parental sense of competence will also be assessed. This project is timely when considering the current situation with regards to rising numbers of children displaying behaviour problems [4] and the known impact of parenting style on the establishment and maintenance child behaviour problems [52, 12, 35]. Additionally, this online programme targets intervention barriers, as parents can complete the web-based programme at home at a convenient time without relying on referrals from professionals.

This intervention has the potential to be a cost-effective early intervention prevention resource both for parents for whom no support would otherwise be available and/or as an alternative cost effective resource for use by the health care services [55]. An evidence-based online intervention could allow professionals to spend more time and resources supporting families with more significant problems, by enabling parents who require general parenting support to access a web-based programme. This could potentially reduce the number of families seeking advice for whom no service currently exists [19].

### Proposed results

This evaluation of a web version of a parenting programme based on 'The Little Parent Handbook', which itself includes material developed as part of an evidence-based intervention, should be a useful addition to the parenting literature. Both parents recruited to the trial and healthcare professionals who were involved in the recruitment phase will be notified of the results of the trial by means of a letter. Researchers will also verbally present

1  
2  
3 the findings to healthcare professionals. If the trial suggests that there are significant benefits,  
4  
5 this would inform a bid for funds for a larger definitive RCT with the goal that the  
6  
7 intervention could subsequently be made available to parents in general as a preventative  
8  
9 programme. This programme could potentially be useful to parents who would like to receive  
10  
11 additional support, but who are not living in targeted areas (such as Flying Start areas in  
12  
13 Wales) where higher levels of parenting support are provided. A preventative universal  
14  
15 programme available to all parents could potentially allow health care professionals more  
16  
17 time and resources to target clinical (or at-risk) populations and also encourage parents to use  
18  
19 well established positive parenting strategies to prevent child behaviour problems from  
20  
21 forming. A universal preventative programme such as this could be useful in encouraging  
22  
23 positive parenting practices for all parents.  
24  
25  
26  
27  
28

29  
30 It is hypothesised that the online programme will encourage parents to use positive parenting  
31  
32 strategies, including spending more time with their child and praising and rewarding positive  
33  
34 child behaviour. Additionally, it is hypothesised that the online programme will improve a  
35  
36 range of outcomes including self-reported parenting practices, parental mental health,  
37  
38 parental confidence and child behaviour.  
39  
40  
41  
42

### 43 **Trial status**

44  
45 The trial is currently on going. Baseline measures for all parents were completed in July 2016  
46  
47 and 3 month-follow up visits are due to be completed by October 2016.  
48  
49  
50

### 51 **Abbreviations**

52  
53 NICE: The National Institute for Health and Care Excellence; ONS: Office for National  
54  
55 Statistics, ANCOVA; Analysis of Covariance; REC: Research Ethics Committee  
56  
57  
58  
59  
60

**Author's contributions**

DAO: designing of the online programme, manuscript writing, gaining ethical approval, data collection, data analysis, critical revision and final approval of manuscript. NG: critical revision and final approval of manuscript. JH: author of 'The Little Parent Handbook', critical revision and final approval of manuscript.

**Competing interests:** The third author [JH] is the author of 'The Little Parent Handbook.

## References

1. Eyberg S, & Robison E. Dyadic Parent-Child Interaction Coding System: A Manual. The Parenting Clinic, University of Washington 1981.
2. Nixon R. Treatment of behaviour problems in pre-schoolers: A review of parent training programs. *Clinical Psychology Review* 2002; 22; 525-546.
3. Knapp M, McCrone P, Fombonne E, et al. The Maudsley long-term follow-up of child and adolescent depression. *The British Journal of Psychiatry* 2002; 180(1); 19-23.
4. National Institute for Health and Care Excellence. Antisocial behaviour and conduct disorders in children and young people: recognition and management. Retrieved from <https://www.nice.org.uk/guidance/cg158> (Accessed May 2013).
5. Foster E, & Jones D. The high costs of aggression: Public expenditures resulting from conduct disorder. *American Journal of Public Health* 2005; 95(10); 1767-1772.
6. Frick P, & Loney B. Outcomes of children and adolescents with oppositional defiant disorder and conduct disorder. In Handbook of disruptive behaviour disorders. Springer US 1999; 507-524.
7. Patterson G, DeBaryshe B, & Ramsey E. A developmental perspective on antisocial behaviour. *American Psychologist* 1990; 44, 329-335.
8. Furlong M, McGilloway S, Bywater T, et al. Cochrane Review: Behavioural and cognitive-behavioural group-based parenting programmes for early-onset conduct problems in children aged 3 to 12 years (Review). *Evidence-Based Child Health: A Cochrane Review Journal* 2012; 8(2), 318-692.
9. Markie-Dadds C, & Sanders M. Self-directed Triple P (positive parenting programme) for mothers with children at-risk of developing conduct problems. *Behavioural and Cognitive Psychotherapy* 2006; 34, 259-275.
10. Hutchings J, Bywater T, Daley D, et al. Parenting intervention in Sue Start services for children at risk of developing conduct disorder: pragmatic randomised controlled trial. *British Medical Journal* 2007; 334(7595), 678.
11. McMahon R, & Forehand R. *Helping the noncompliant child: Family-based treatment for oppositional behaviour*. Guilford Press 2005.
12. Gardner F, Hutchings J, Bywater T, et al. Who benefits and how does it work? Moderators and mediators of outcome in an effectiveness trial of a parenting intervention. *Journal of Clinical Child & Adolescent Psychology* 2010; 39(4), 568-580 2010.
13. Webster-Stratton C, Reid J, & Hammond M. Social skills and problem-solving training for children with early-onset conduct problems: Who benefits? *Journal of Child Psychology and Psychiatry* 2001; 42(7), 943-952.

- 1
- 2
- 3
- 4 14. Allen G. Early Intervention: The next steps. *An independent report to Her Majesty's*
- 5 *Government*. The Stationery Office 2011.
- 6 15. Hutchings J, & Bywater T. Evidence for the Incredible Years (IY) Programmes in
- 7 Wales. 2010.
- 8
- 9
- 10 16. Jones K, Daley D, Hutchings J, et al. (2007). Efficacy of the Incredible Years Basic
- 11 parent-training programme as an early intervention for children with conduct
- 12 problems and ADHD. *Child: Care, Health and Development*, 2007, 33(6), 749-756.
- 13
- 14 17. Welsh Government Website. Retrieved from [http://gov.wales/topics/people-and-](http://gov.wales/topics/people-and-communities/people/children-and-young-people/parenting-support-guidance/help/flyingstart/?lang=en)
- 15 [communities/people/children-and-young-people/parenting-support-](http://gov.wales/topics/people-and-communities/people/children-and-young-people/parenting-support-guidance/help/flyingstart/?lang=en)
- 16 [guidance/help/flyingstart/?lang=en](http://gov.wales/topics/people-and-communities/people/children-and-young-people/parenting-support-guidance/help/flyingstart/?lang=en) (Accessed October 2016).
- 17
- 18 18. Koerting J, Smith E, Knowles M, et al. Barriers to, and facilitators of, parenting
- 19 programmes for childhood behaviour problems: a qualitative synthesis of studies of
- 20 parents' and professionals' perceptions. *European child & adolescent psychiatry*
- 21 2013; 22(11); 653-670.
- 22
- 23 19. Lingley-Pottie P, & McGrath P. Distance therapeutic alliance: the participant's
- 24 experience. *Advances in Nursing Science* 2007; 30(4); 353-366.
- 25
- 26 20. Edwards R, Céilleachair A, Bywater T, et al. Parenting programme for parents of
- 27 children at risk of developing conduct disorder: cost effectiveness analysis. *BMJ*
- 28 2007; 334(7595); 682.
- 29
- 30 21. Wilson P, Furnivall J, Barbour R, et al. The work of health visitors and school nurses
- 31 with children with psychological and behavioural problems. *Journal of advanced*
- 32 *nursing* 2008; 61(4); 445-455.
- 33
- 34 22. Elgar F, & McGrath P. Self-administered psychosocial treatments for children and
- 35 families. *Journal of Clinical Psychology* 2003; 59(3); 321-339.
- 36
- 37 23. Wantland D, Portillo C, Holzemer W, et al. The effectiveness of a web-based versus
- 38 non web-based interventions: A meta-analysis of behavioural change outcomes.
- 39 *Journal of Medical Internet Research* 2004; 6(4).
- 40
- 41 24. Bert S, Farris J, & Borkowski J. Parent training: Implementation strategies for
- 42 adventures in parenting. *The Journal of Primary Prevention* 2008; 29; 243-261.
- 43
- 44 25. Jones D, Forehand R, Cuellar J, et al. Technology-enhanced programme for child
- 45 disruptive development and pilot randomized control trial. *Journal of Clinical Child*
- 46 *and Adolescent Psychology* 2014; 43(1); 88-101.
- 47
- 48 26. Office for National Statistics. Statistical Bulletin. Internet Access – Households and
- 49 Individuals. London: Office for National Statistics 2013.
- 50
- 51 27. Office for National Statistics. Statistical Bulletin .Internet access- households and
- 52 individuals 2015. London: Office for National Statistics 2015.
- 53
- 54
- 55
- 56
- 57
- 58
- 59
- 60

- 1
- 2
- 3 28. Duggan M, & Lenhart A. Parents and social media. Pew Research Centre. Retrieved
- 4 from <http://www.pewinternet.org/2015/07/16/parents-and-social-media/> (accessed
- 5 May 2015).
- 6
- 7 29. Netmums. Retrieved from <https://netmums.com/home/about-us> (accessed June 6th
- 8 2016).
- 9
- 10 30. Gold B, Burke S, Pintauro S, et al. Weight loss on the web: A pilot study comparing a
- 11 structured behavioural intervention to a commercial programme. *Obesity* 2006; 15(1);
- 12 155-164.
- 13
- 14 31. Linke S, Browne A, & Wallace P. Down your Drink: A web-based intervention for
- 15 people with excessive alcohol consumption. *Alcohol and Alcoholism* 2004; 3(91); 29-
- 16 32.
- 17
- 18 32. Baggett K, Davis B, Feil E, et al. Technologies for expanding the research of
- 19 evidence-based interventions: Preliminary results for promoting social-emotional
- 20 development in early childhood. *Topics in Early Childhood Special Education* 2010.
- 21 doi: 10.1177/0271121409354782
- 22
- 23 33. Enebrink P, Högström J, Forster M, et al. Internet-based parent management training:
- 24 A randomised controlled study. *Behaviour research and Therapy* 2012; 50(4); 240-
- 25 249.
- 26
- 27 34. Bayer J, Hiscock H, Morton-Allen E, et al. Prevention of mental health problems:
- 28 rationale for a universal approach. *Archives of disease in childhood* 2007; 92(1); 34-
- 29 38.
- 30
- 31 35. Hutchings J. The Little Parent Handbook. *Children's Early Intervention Trust;*
- 32 *Bangor* 2013.
- 33
- 34 36. Eyberg S, & Robison E. Conduct problem behaviour: Standardisation of behavioural
- 35 rating. *Journal of Clinical Child and Adolescent Psychology*, 1983; 12(3); 347-354.
- 36
- 37 37. Hutchings J, Appleton P, Smith M, et al. Evaluation of two treatments for children
- 38 with severe behaviour problems: child behaviour and maternal mental health
- 39 outcomes. *Behavioural and Cognitive Psychotherapy* 2002; 30(03); 279-295.
- 40
- 41 38. Hutchings J, Lane E, & Kelly J. Comparison of two treatments for children with
- 42 severely disruptive behaviours: A four-year follow-up. *Behaviour and Cognitive*
- 43 *Psychotherapy* 2004; 32; 15-30.
- 44
- 45 39. Lane E, & Hutchings J. Benefits of a course in behavioural analysis for health
- 46 visitors. *British Journal of Nursing* 2002; 11(10); 702-714.
- 47
- 48 40. Yardley L, Osmond A, Hare J, et al. Introduction to the LifeGuide: software
- 49 facilitating the development of interactive behaviour change internet interventions.
- 50 *Persuasive technology and digital behaviour intervention symposium*; Edinburgh: GB
- 51 2009.
- 52
- 53
- 54
- 55
- 56
- 57
- 58
- 59
- 60



- 1
- 2
- 3 41. Hare J, Osmond A, Yang Y, et al. LifeGuide: A platform for performing web-based
- 4 behavioural interventions, *Web-Science: Society On-Line* 2009; 18-20.
- 5
- 6 42. Cooper J, Heron T, & Heward W. Applied Behaviour Analysis (2<sup>nd</sup> ed.). *Upper*
- 7 *Saddle River: NJ* 2007.
- 8
- 9
- 10 43. Robinson E, & Eyberg S. The dyadic parent-child interaction coding system:
- 11 Standardization and validation. *Journal of Consulting and Clinical Psychology*
- 12 1981; 49(2); 245.
- 13
- 14 44. Aspland H, & Gardner F. Observational measures of parent-child interaction: An
- 15 introductory review. *Child and Adolescent Mental Health* 2003; 8(3); 136-143.
- 16
- 17 45. Eames C, Daley D, Hutchings J. et al. C. The impact of group leaders' behaviour on
- 18 parents acquisition of key parenting skills during parent training. *Behaviour Research*
- 19 *and Therapy* 2012; 48(12); 1221-1226.
- 20
- 21
- 22 46. Arnold D, O'Leary S, Wolff L, et al. The Parenting Scale: A measure of
- 23 dysfunctional parenting in discipline situations. *Psychological Assessment* 1993; 5(2);
- 24 137-144.
- 25
- 26 47. Johnston C, & Mash E. A measure of parental satisfaction and efficacy. *Journal of*
- 27 *Clinical Child Psychology* 1981; 18(2); 167-175.
- 28
- 29
- 30 48. Ohan J, Leung D, & Johnston C. The Parenting Sense of Competence scale: Evidence
- 31 of a stable factor structure and validity. *Canadian Journal of Behavioural*
- 32 *2000;* 32(4); 251.
- 33
- 34 49. Goldberg D. Manual of the General Health Questionnaire. Windsor: England 1978.
- 35
- 36 50. Huppert F, Walters D, Day N, et al. The factor structure of the General Health
- 37 Questionnaire (GHQ-30). A reliability study on 6317 community residents. *The*
- 38 *British Journal of Psychiatry* 1989; 155(2); 178-185.
- 39
- 40 51. Jackson C. The general health questionnaire. *Occupational medicine* 2007; 57(1); 79.
- 41
- 42 52. Hutchings J, Bywater T, Williams M, et al. Improvements in maternal depression as
- 43 a mediator of child behaviour change. *Psychology* 2012; 3(09); 795.
- 44
- 45 53. Hutchings J. The personal and parental characteristics of preschool children referred
- 46 to a child and family mental health service and their relation to treatment
- 47 outcome (Doctoral dissertation, University of Wales) 1996.
- 48
- 49
- 50 54. Sterne J, White I, Carlin J, et al. Multiple imputation for missing data in
- 51 epidemiological and clinical research: potential and pitfalls. *Bmj*, 2009; 338, b2393.
- 52
- 53
- 54 55. Ary D, Glang A, & Irvine B. The benefits, science and persuasive technology of
- 55 successful eHealth behavioural interventions: Effective use of evidence-based
- 56 scientific techniques to change health behaviour. ORCAS 2012.
- 57
- 58
- 59
- 60

1  
2  
3 Figure legend: Participant flow chart  
4  
5  
6  
7  
8  
9  
10  
11  
12  
13  
14  
15  
16  
17  
18  
19  
20  
21  
22  
23  
24  
25  
26  
27  
28  
29  
30  
31  
32  
33  
34  
35  
36  
37  
38  
39  
40  
41  
42  
43  
44  
45  
46  
47  
48  
49  
50  
51  
52  
53  
54  
55  
56  
57  
58  
59  
60

For peer review only

1  
2  
3  
4  
5  
6  
7  
8  
9  
10  
11  
12  
13  
14  
15  
16  
17  
18  
19  
20  
21  
22  
23  
24  
25  
26  
27  
28  
29  
30  
31  
32  
33  
34  
35  
36  
37  
38  
39  
40  
41  
42  
43  
44  
45  
46  
47  
48  
49  
50  
51  
52  
53  
54  
55  
56  
57  
58  
59  
60

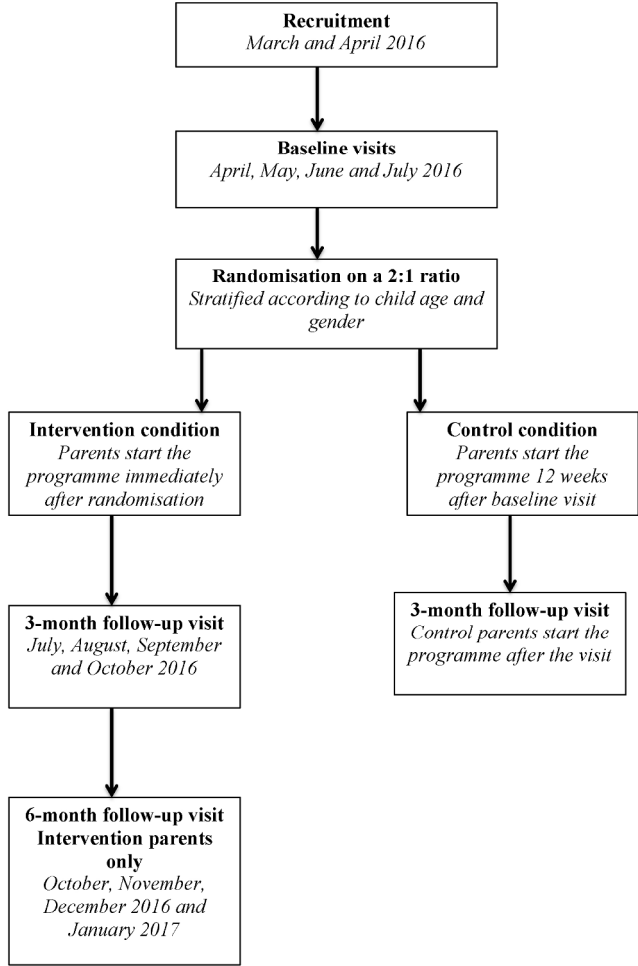

Participant flow chart

209x297mm (300 x 300 DPI)

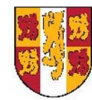

COLEG GWYDDORAU IECHYD AC YMDDYGIAD  
COLLEGE OF HEALTH AND BEHAVIOURAL SCIENCES

YSGOL SEICOLEG  
SCHOOL OF PSYCHOLOGY

**Study Participant Identification Number:**

**PARENT CONSENT FORM**

Title of the Project: Evaluation of an online parenting programme based on 'The Little Parent Handbook'

Name of Researcher: \_\_\_\_\_

Please initial box

- 1. I confirm that I have read the information sheet dated..... for the above study. I have had the opportunity to consider the information provided and have had questions answered satisfactorily by the researcher.
- 2. I understand that my participation in this research study is voluntary and that I am free to withdraw at any time without having to give an explanation, without my legal rights being affected.
- 3. I understand that the researcher will ask me to fill out questionnaires.
- 4. I understand that the researcher will undertake a 30-minute observation of myself interacting with my child.
- 5. I understand that I will be asked to keep on-going weekly records about my child.
- 6. I understand that I will need an internet connection in order to participate in this online study.
- 7. I understand that the study will last for 10 weeks and I will have one week to complete each section of the online programme.
- 8. I understand that all information will be kept confidential unless any matter(s) regarding child protection issues arise.
- 9. I agree to take part in the above study.

Name of participant: \_\_\_\_\_ Date: \_\_\_\_\_ Signature: \_\_\_\_\_

Name of person taking consent: \_\_\_\_\_ Date: \_\_\_\_\_ Signature: \_\_\_\_\_

**PRIFYSGOL BANGOR**  
ADEILAD BRIGANTIA,  
FFORDD PENRALLT,  
BANGOR,GWYNEDD, LL57 2AS

**BANGOR UNIVERSITY**  
BRIGANTIA BUILDING,  
PENRALLT ROAD,  
BANGOR, GWYNEDD, LL57 2AS

**ATHRO/PROFESSOR JOHN PARKINSON** BA, PhD  
PENNAETH YR YSGOL/HEAD OF SCHOOL

EBOST: [seicoleg@bangor.ac.uk](mailto:seicoleg@bangor.ac.uk)  
EMAIL: [psychology@bangor.ac.uk](mailto:psychology@bangor.ac.uk)

FFÔN: (01248) 382211

TEL:(01248) 382211  
**Registered charity number:**  
**1141565**

[www.bangor.ac.uk](http://www.bangor.ac.uk) [www.bangor.ac.uk/psychology](http://www.bangor.ac.uk/psychology)

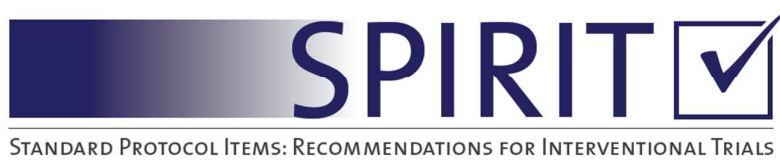

SPIRIT 2013 Checklist: Recommended items to address in a clinical trial protocol and related documents\*

| Section/item                      | Item No | Description                                                                                                                                                                                                                                                                                                                               |
|-----------------------------------|---------|-------------------------------------------------------------------------------------------------------------------------------------------------------------------------------------------------------------------------------------------------------------------------------------------------------------------------------------------|
| <b>Administrative information</b> |         |                                                                                                                                                                                                                                                                                                                                           |
| Title                             | 1       | Descriptive title identifying the study design, population, interventions, and, if applicable, trial acronym ( <a href="#">page 1</a> )                                                                                                                                                                                                   |
| Trial registration                | 2a      | Trial identifier and registry name. If not yet registered, name of intended registry ( <a href="#">page 3</a> )                                                                                                                                                                                                                           |
|                                   | 2b      | All items from the World Health Organization Trial Registration Data Set ( <a href="#">not applicable</a> )                                                                                                                                                                                                                               |
|                                   | 3       | Date and version identifier ( <a href="#">page 1</a> )                                                                                                                                                                                                                                                                                    |
| Funding                           | 4       | Sources and types of financial, material, and other support ( <a href="#">page 1</a> )                                                                                                                                                                                                                                                    |
| Roles and responsibilities        | 5a      | Names, affiliations, and roles of protocol contributors ( <a href="#">page 1</a> )                                                                                                                                                                                                                                                        |
|                                   | 5b      | Name and contact information for the trial sponsor ( <a href="#">page 1</a> )                                                                                                                                                                                                                                                             |
|                                   | 5c      | Role of study sponsor and funders, if any, in study design; collection, management, analysis, and interpretation of data; writing of the report; and the decision to submit the report for publication, including whether they will have ultimate authority over any of these activities ( <a href="#">page 23</a> )                      |
|                                   | 5d      | Composition, roles, and responsibilities of the coordinating centre, steering committee, endpoint adjudication committee, data management team, and other individuals or groups overseeing the trial, if applicable (see Item 21a for data monitoring committee) ( <a href="#">not applicable – all work carried out by the authors</a> ) |
| <b>Introduction</b>               |         |                                                                                                                                                                                                                                                                                                                                           |
| Background and rationale          | 6a      | Description of research question and justification for undertaking the trial, including summary of relevant studies (published and unpublished) examining benefits and harms for each intervention ( <a href="#">pages 3 – 7</a> )                                                                                                        |
|                                   | 6b      | Explanation for choice of comparators ( <a href="#">page 18-19</a> )                                                                                                                                                                                                                                                                      |
| Objectives                        | 7       | Specific objectives or hypotheses ( <a href="#">pages 7–8</a> )                                                                                                                                                                                                                                                                           |

1  
2  
3  
4  
5  
6  
7  
8  
9  
10  
11  
12  
13  
14  
15  
16  
17  
18  
19  
20  
21  
22  
23  
24  
25  
26  
27  
28  
29  
30  
31  
32  
33  
34  
35  
36  
37  
38  
39  
40  
41  
42  
43  
44  
45  
46  
47  
48  
49  
50  
51  
52  
53  
54

|              |   |                                                                                                                                                                                                                                    |
|--------------|---|------------------------------------------------------------------------------------------------------------------------------------------------------------------------------------------------------------------------------------|
| Trial design | 8 | Description of trial design including type of trial (eg, parallel group, crossover, factorial, single group), allocation ratio, and framework (eg, superiority, equivalence, noninferiority, exploratory) <a href="#">(page 8)</a> |
|--------------|---|------------------------------------------------------------------------------------------------------------------------------------------------------------------------------------------------------------------------------------|

#### **Methods: Participants, interventions, and outcomes**

|               |   |                                                                                                                                                                                                             |
|---------------|---|-------------------------------------------------------------------------------------------------------------------------------------------------------------------------------------------------------------|
| Study setting | 9 | Description of study settings (eg, community clinic, academic hospital) and list of countries where data will be collected. Reference to where list of study sites can be obtained <a href="#">(page 8)</a> |
|---------------|---|-------------------------------------------------------------------------------------------------------------------------------------------------------------------------------------------------------------|

|                      |    |                                                                                                                                                                                                                         |
|----------------------|----|-------------------------------------------------------------------------------------------------------------------------------------------------------------------------------------------------------------------------|
| Eligibility criteria | 10 | Inclusion and exclusion criteria for participants. If applicable, eligibility criteria for study centres and individuals who will perform the interventions (eg, surgeons, psychotherapists) <a href="#">(page 8-9)</a> |
|----------------------|----|-------------------------------------------------------------------------------------------------------------------------------------------------------------------------------------------------------------------------|

|               |     |                                                                                                                                                          |
|---------------|-----|----------------------------------------------------------------------------------------------------------------------------------------------------------|
| Interventions | 11a | Interventions for each group with sufficient detail to allow replication, including how and when they will be administered <a href="#">(pages 10–15)</a> |
|---------------|-----|----------------------------------------------------------------------------------------------------------------------------------------------------------|

|  |     |                                                                                                                                                                                                                                                          |
|--|-----|----------------------------------------------------------------------------------------------------------------------------------------------------------------------------------------------------------------------------------------------------------|
|  | 11b | Criteria for discontinuing or modifying allocated interventions for a given trial participant (eg, drug dose change in response to harms, participant request, or improving/worsening disease) <a href="#">(no criteria for discontinuing treatment)</a> |
|--|-----|----------------------------------------------------------------------------------------------------------------------------------------------------------------------------------------------------------------------------------------------------------|

|  |     |                                                                                                                                                                                  |
|--|-----|----------------------------------------------------------------------------------------------------------------------------------------------------------------------------------|
|  | 11c | Strategies to improve adherence to intervention protocols, and any procedures for monitoring adherence (eg, drug tablet return, laboratory tests) <a href="#">Not applicable</a> |
|--|-----|----------------------------------------------------------------------------------------------------------------------------------------------------------------------------------|

|  |     |                                                                                                                              |
|--|-----|------------------------------------------------------------------------------------------------------------------------------|
|  | 11d | Relevant concomitant care and interventions that are permitted or prohibited during the trial <a href="#">Not applicable</a> |
|--|-----|------------------------------------------------------------------------------------------------------------------------------|

|          |    |                                                                                                                                                                                                                                                                                                                                                                                                              |
|----------|----|--------------------------------------------------------------------------------------------------------------------------------------------------------------------------------------------------------------------------------------------------------------------------------------------------------------------------------------------------------------------------------------------------------------|
| Outcomes | 12 | Primary, secondary, and other outcomes, including the specific measurement variable (eg, systolic blood pressure), analysis metric (eg, change from baseline, final value, time to event), method of aggregation (eg, median, proportion), and time point for each outcome. Explanation of the clinical relevance of chosen efficacy and harm outcomes is strongly recommended <a href="#">(pages 15-18)</a> |
|----------|----|--------------------------------------------------------------------------------------------------------------------------------------------------------------------------------------------------------------------------------------------------------------------------------------------------------------------------------------------------------------------------------------------------------------|

|                      |    |                                                                                                                                                                                                                             |
|----------------------|----|-----------------------------------------------------------------------------------------------------------------------------------------------------------------------------------------------------------------------------|
| Participant timeline | 13 | Time schedule of enrolment, interventions (including any run-ins and washouts), assessments, and visits for participants. A schematic diagram is highly recommended (see Figure) <a href="#">(insert figure on page 20)</a> |
|----------------------|----|-----------------------------------------------------------------------------------------------------------------------------------------------------------------------------------------------------------------------------|

|             |    |                                                                                                                                                                                                                    |
|-------------|----|--------------------------------------------------------------------------------------------------------------------------------------------------------------------------------------------------------------------|
| Sample size | 14 | Estimated number of participants needed to achieve study objectives and how it was determined, including clinical and statistical assumptions supporting any sample size calculations <a href="#">(page 18-19)</a> |
|-------------|----|--------------------------------------------------------------------------------------------------------------------------------------------------------------------------------------------------------------------|

|             |    |                                                                                                                  |
|-------------|----|------------------------------------------------------------------------------------------------------------------|
| Recruitment | 15 | Strategies for achieving adequate participant enrolment to reach target sample size <a href="#">(pages 9-10)</a> |
|-------------|----|------------------------------------------------------------------------------------------------------------------|

#### **Methods: Assignment of interventions (for controlled trials)**

Allocation:

|    |                |     |                                                                                   |
|----|----------------|-----|-----------------------------------------------------------------------------------|
| 1  |                |     |                                                                                   |
| 2  | Sequence       | 16a | Method of generating the allocation sequence (eg, computer-                       |
| 3  | generation     |     | generated random numbers), and list of any factors for stratification.            |
| 4  |                |     | To reduce predictability of a random sequence, details of any planned             |
| 5  |                |     | restriction (eg, blocking) should be provided in a separate document              |
| 6  |                |     | that is unavailable to those who enrol participants or assign                     |
| 7  |                |     | interventions ( <a href="#">pages 19-20</a> )                                     |
| 8  |                |     |                                                                                   |
| 9  | Allocation     | 16b | Mechanism of implementing the allocation sequence (eg, central                    |
| 10 | concealment    |     | telephone; sequentially numbered, opaque, sealed envelopes),                      |
| 11 | mechanism      |     | describing any steps to conceal the sequence until interventions are              |
| 12 |                |     | assigned ( <a href="#">pages 19-20</a> )                                          |
| 13 |                |     |                                                                                   |
| 14 | Implementation | 16c | Who will generate the allocation sequence, who will enrol participants,           |
| 15 |                |     | and who will assign participants to interventions ( <a href="#">pages 19-20</a> ) |
| 16 |                |     |                                                                                   |
| 17 | Blinding       | 17a | Who will be blinded after assignment to interventions (eg, trial                  |
| 18 | (masking)      |     | participants, care providers, outcome assessors, data analysts), and              |
| 19 |                |     | how ( <a href="#">page 20</a> )                                                   |
| 20 |                |     |                                                                                   |
| 21 |                | 17b | If blinded, circumstances under which unblinding is permissible, and              |
| 22 |                |     | procedure for revealing a participant's allocated intervention during             |
| 23 |                |     | the trial ( <a href="#">page 20</a> )                                             |
| 24 |                |     |                                                                                   |
| 25 |                |     |                                                                                   |
| 26 |                |     |                                                                                   |

### Methods: Data collection, management, and analysis

|    |                 |     |                                                                                        |
|----|-----------------|-----|----------------------------------------------------------------------------------------|
| 27 |                 |     |                                                                                        |
| 28 | Data collection | 18a | Plans for assessment and collection of outcome, baseline, and other                    |
| 29 | methods         |     | trial data, including any related processes to promote data quality (eg,               |
| 30 |                 |     | duplicate measurements, training of assessors) and a description of                    |
| 31 |                 |     | study instruments (eg, questionnaires, laboratory tests) along with                    |
| 32 |                 |     | their reliability and validity, if known. Reference to where data                      |
| 33 |                 |     | collection forms can be found, if not in the protocol ( <a href="#">pages 18</a> )     |
| 34 |                 |     |                                                                                        |
| 35 |                 | 18b | Plans to promote participant retention and complete follow-up,                         |
| 36 |                 |     | including list of any outcome data to be collected for participants who                |
| 37 |                 |     | discontinue or deviate from intervention protocols ( <a href="#">page 18</a> )         |
| 38 |                 |     |                                                                                        |
| 39 | Data            | 19  | Plans for data entry, coding, security, and storage, including any                     |
| 40 | management      |     | related processes to promote data quality (eg, double data entry;                      |
| 41 |                 |     | range checks for data values). Reference to where details of data                      |
| 42 |                 |     | management procedures can be found, if not in the protocol ( <a href="#">page 18</a> ) |
| 43 |                 |     |                                                                                        |
| 44 | Statistical     | 20a | Statistical methods for analysing primary and secondary outcomes.                      |
| 45 | methods         |     | Reference to where other details of the statistical analysis plan can be               |
| 46 |                 |     | found, if not in the protocol ( <a href="#">page 20</a> )                              |
| 47 |                 |     |                                                                                        |
| 48 |                 | 20b | Methods for any additional analyses (eg, subgroup and adjusted                         |
| 49 |                 |     | analyses) ( <a href="#">page 20</a> )                                                  |
| 50 |                 |     |                                                                                        |
| 51 |                 | 20c | Definition of analysis population relating to protocol non-adherence                   |
| 52 |                 |     | (eg, as randomised analysis), and any statistical methods to handle                    |
| 53 |                 |     | missing data (eg, multiple imputation) ( <a href="#">page 20</a> )                     |
| 54 |                 |     |                                                                                        |
| 55 |                 |     |                                                                                        |
| 56 |                 |     |                                                                                        |
| 57 |                 |     |                                                                                        |
| 58 |                 |     |                                                                                        |
| 59 |                 |     |                                                                                        |
| 60 |                 |     |                                                                                        |

**Methods: Monitoring**

- 1  
2  
3  
4  
5  
6  
7  
8  
9  
10  
11  
12  
13  
14  
15  
16  
17  
18  
19  
20  
21  
22  
23  
24
- |                 |     |                                                                                                                                                                                                                                                                                                                                                             |
|-----------------|-----|-------------------------------------------------------------------------------------------------------------------------------------------------------------------------------------------------------------------------------------------------------------------------------------------------------------------------------------------------------------|
| Data monitoring | 21a | Composition of data monitoring committee (DMC); summary of its role and reporting structure; statement of whether it is independent from the sponsor and competing interests; and reference to where further details about its charter can be found, if not in the protocol. Alternatively, an explanation of why a DMC is not needed <b>Not applicable</b> |
|                 | 21b | Description of any interim analyses and stopping guidelines, including who will have access to these interim results and make the final decision to terminate the trial <b>Not applicable</b>                                                                                                                                                               |
| Harms           | 22  | Plans for collecting, assessing, reporting, and managing solicited and spontaneously reported adverse events and other unintended effects of trial interventions or trial conduct <b>Not applicable</b>                                                                                                                                                     |
| Auditing        | 23  | Frequency and procedures for auditing trial conduct, if any, and whether the process will be independent from investigators and the sponsor <b>(process will not be independent from Bangor University)</b>                                                                                                                                                 |

**Ethics and dissemination**

- 25  
26  
27  
28  
29  
30  
31  
32  
33  
34  
35  
36  
37  
38  
39  
40  
41  
42  
43  
44  
45  
46  
47  
48  
49  
50  
51  
52  
53  
54  
55  
56  
57  
58  
59  
60
- |                          |     |                                                                                                                                                                                                                                                                                                                         |
|--------------------------|-----|-------------------------------------------------------------------------------------------------------------------------------------------------------------------------------------------------------------------------------------------------------------------------------------------------------------------------|
| Research ethics approval | 24  | Plans for seeking research ethics committee/institutional review board (REC/IRB) approval <b>(pages 2-3)</b>                                                                                                                                                                                                            |
| Protocol amendments      | 25  | Plans for communicating important protocol modifications (eg, changes to eligibility criteria, outcomes, analyses) to relevant parties (eg, investigators, REC/IRBs, trial participants, trial registries, journals, regulators) <b>(authors will contact relevant parties if any changes to protocol should occur)</b> |
| Consent or assent        | 26a | Who will obtain informed consent or assent from potential trial participants or authorised surrogates, and how (see Item 32) <b>(pages 9-10)</b>                                                                                                                                                                        |
|                          | 26b | Additional consent provisions for collection and use of participant data and biological specimens in ancillary studies, if applicable <b>Not applicable</b>                                                                                                                                                             |
| Confidentiality          | 27  | How personal information about potential and enrolled participants will be collected, shared, and maintained in order to protect confidentiality before, during, and after the trial <b>(all data will remain confidential before, during and after the trial)</b>                                                      |
| Declaration of interests | 28  | Financial and other competing interests for principal investigators for the overall trial and each study site <b>(page 23)</b>                                                                                                                                                                                          |
| Access to data           | 29  | Statement of who will have access to the final trial dataset, and disclosure of contractual agreements that limit such access for investigators <b>(only the authors will have access to the data)</b>                                                                                                                  |



|    |                   |     |                                                                              |
|----|-------------------|-----|------------------------------------------------------------------------------|
| 1  |                   |     |                                                                              |
| 2  | Ancillary and     | 30  | Provisions, if any, for ancillary and post-trial care, and for               |
| 3  | post-trial care   |     | compensation to those who suffer harm from trial participation <b>Not</b>    |
| 4  |                   |     | <b>applicable</b>                                                            |
| 5  |                   |     |                                                                              |
| 6  | Dissemination     | 31a | Plans for investigators and sponsor to communicate trial results to          |
| 7  | policy            |     | participants, healthcare professionals, the public, and other relevant       |
| 8  |                   |     | groups (eg, via publication, reporting in results databases, or other        |
| 9  |                   |     | data sharing arrangements), including any publication restrictions           |
| 10 |                   |     | <b>(pages 21-22)</b>                                                         |
| 11 |                   |     |                                                                              |
| 12 |                   | 31b | Authorship eligibility guidelines and any intended use of professional       |
| 13 |                   |     | writers <b>Not applicable</b>                                                |
| 14 |                   |     |                                                                              |
| 15 |                   | 31c | Plans, if any, for granting public access to the full protocol, participant- |
| 16 |                   |     | level dataset, and statistical code <b>No plans</b>                          |
| 17 |                   |     |                                                                              |
| 18 |                   |     |                                                                              |
| 19 | <b>Appendices</b> |     |                                                                              |
| 20 |                   |     |                                                                              |
| 21 | Informed consent  | 32  | Model consent form and other related documentation given to                  |
| 22 | materials         |     | participants and authorised surrogates <b>Uploaded with submission</b>       |
| 23 |                   |     |                                                                              |
| 24 | Biological        | 33  | Plans for collection, laboratory evaluation, and storage of biological       |
| 25 | specimens         |     | specimens for genetic or molecular analysis in the current trial and for     |
| 26 |                   |     | future use in ancillary studies, if applicable <b>Not applicable</b>         |
| 27 |                   |     |                                                                              |

---

28 \*It is strongly recommended that this checklist be read in conjunction with the SPIRIT 2013  
29 Explanation & Elaboration for important clarification on the items. Amendments to the  
30 protocol should be tracked and dated. The SPIRIT checklist is copyrighted by the SPIRIT  
31 Group under the Creative Commons "[Attribution-NonCommercial-NoDerivs 3.0 Unported](https://creativecommons.org/licenses/by-nc-nd/3.0/)"  
32 license.  
33  
34  
35  
36  
37  
38  
39  
40  
41  
42  
43  
44  
45  
46  
47  
48  
49  
50  
51  
52  
53  
54  
55  
56  
57  
58  
59  
60

# BMJ Open

## Evaluation of the COPING Parent online universal programme: Study protocol for a pilot randomised controlled trial

|                                 |                                                                                                                                                       |
|---------------------------------|-------------------------------------------------------------------------------------------------------------------------------------------------------|
| Journal:                        | <i>BMJ Open</i>                                                                                                                                       |
| Manuscript ID                   | bmjopen-2016-013381.R3                                                                                                                                |
| Article Type:                   | Protocol                                                                                                                                              |
| Date Submitted by the Author:   | 27-Feb-2017                                                                                                                                           |
| Complete List of Authors:       | Owen, Dawn; Bangor University, Psychology<br>Griffith, Nia; Bangor University, Psychology<br>Hutchings, Judy; Bangor University, School of Psychology |
| <b>Primary Subject Heading</b>: | Evidence based practice                                                                                                                               |
| Secondary Subject Heading:      | Public health                                                                                                                                         |
| Keywords:                       | Clinical trials < THERAPEUTICS, STATISTICS & RESEARCH METHODS, Child & adolescent psychiatry < PSYCHIATRY                                             |
|                                 |                                                                                                                                                       |

SCHOLARONE™  
Manuscripts

1  
2  
3 **Title:** Evaluation of the COPING Parent online universal programme: Study protocol for  
4  
5 a pilot randomised controlled trial  
6  
7

8  
9  
10 **Authors:** Dawn Adele Owen, Nia Griffith, Judy Hutchings

11 **Author details:**

12  
13  
14 Centre for Evidence Based Early Intervention, School of Psychology, Nantlle Building,

15  
16 Normal Site, Bangor University, Bangor, Gwynedd, LL57 2PZ, UK (01248 383 758).

17  
18 Email: [dawn.a.owen@bangor.a.uk](mailto:dawn.a.owen@bangor.a.uk)  
19

20  
21  
22  
23 School of Psychology, Wheldon Building, Room 113, Bangor University, Bangor, Gwynedd,  
24  
25 LL57 2PZ, UK.

26  
27 Email: [n.griffith@bangor.ac.uk](mailto:n.griffith@bangor.ac.uk)  
28

29  
30  
31  
32 Centre for Evidence Based Early Intervention, School of Psychology, Nantlle Building,

33  
34 Normal Site, Bangor University, Bangor, Gwynedd, LL57 2PZ, UK.

35  
36 Email: [j.hutchings@bangor.ac.uk](mailto:j.hutchings@bangor.ac.uk)  
37

38  
39  
40 **Version 4: 24/02/2017**  
41

42  
43  
44  
45 **Keywords:** child behaviour, online parenting programme, randomised controlled trial,  
46  
47 positive parenting, and health care services  
48

49  
50  
51 **Word count:** 5,033  
52

53  
54  
55  
56 **Trial Sponsor:** Bangor University, Brigantia Building, College Road, Bangor, LL57 2AS  
57  
58  
59  
60

## Abstract

**Introduction:** The COPING parent online universal programme is a web-based parenting intervention for parents of children aged 3-8 with an interest in positive parenting. The programme focuses on strengthening parent-child relationships and encouraging positive child behaviour. This trial will evaluate whether the intervention is effective in increasing the use of positive parenting strategies outlined in the programme using parent report and blind observation measures.

**Methods and analysis:** This is a pilot randomised controlled trial with intervention and wait-list control conditions. The intervention is a ten-week online parenting programme to promote positive parent-child relations by teaching core social learning theory principles that encourage positive child behaviour, primarily through the use of praise and rewards. Health visitors and school nurses will circulate a recruitment poster to parents of children aged 3-8 years on their current caseloads. Recruitment posters will also be distributed via local primary schools and nurseries. Parents recruited to the trial will be randomised on a 2:1 ratio to intervention or wait-list control conditions (stratified according to child gender and age). The primary outcome measure is positive parenting as measured by a behavioural observation of parent-child interactions using the Dyadic Parent-Child Interaction Coding System. Secondary outcomes include parent report of child behaviour, and self-reported parental sense of competence, parenting behaviour and parental mental health. Data will be collected at baseline and three months later (post-intervention) for all participants and six months post-baseline for the intervention group only. ANCOVA will be the main statistical method used.

**Trial registration:** Current Controlled Trials ISRCTN89370147 (May 5th 2016).

### Strengths and limitations

- This is a randomised controlled trial (RCT) with a wait-list control group.
- The behavioural observations will incorporate an inter-rater reliability component (20% of all observations at each time point).
- Once randomised, intervention parents start the online programme immediately thus reducing the amount of time spent waiting for the intervention.
- A limitation of this study is internet based only without any additional support and parents are required to log in each week and engage with the programme. This may result in some parents not fully engaging and the potential loss of follow-up data.
- Due to time and funding constraints, this pilot trial aims to enroll sixty parents, which is a fairly small sample size not based on a power calculation.
- Funding and time constraints do not allow for a follow-up beyond 6 months.

### Background

Societal changes are presenting new challenges for parents that can impact on parent-child relations, child behaviour and parenting style. For example increased time spent playing video games impacts on child mental health and social relationships [1] and changes in marital status/family structures including divorce affect children's social and emotional competence [2] and can reduce parental competencies [3]. Dysfunctional parenting is a key factor in the subsequent development of problematic child behaviour [4].

Minor child problem behaviours can develop into significant problems unless addressed whilst children are still young [5, 6]. Conduct problems have a significant impact on children's functioning and quality of life [7] with up to 50% of children and young people with conduct disorder developing antisocial personality disorder [8, 7]. It is therefore

1  
2  
3 important to provide early universal support to all parents to help them to address the small  
4 behavioural challenges faced by parents and prevent them from progressing into longer-term  
5 ones.  
6  
7  
8  
9

10  
11 Increases in the numbers of children with identified early onset of behavioural difficulties  
12 have resulted in health visitors and school nurses spending much of their time supporting  
13 families with children at significant risk of poor outcomes [9], reducing their ability to  
14 provide more general support to all families [10]. A survey of health visitors and school  
15 nurses reported that 53% of health visitors saw between 21-50, and 46% of school nurses saw  
16 between 50-99 children with emotional or behavioural problems each week [9]. These  
17 growing demands on health visitors and school nurses' time reduces their ability to support  
18 all parents at a time when parents are bringing up children in a rapidly changing world with  
19 additional challenges [1].  
20  
21  
22  
23  
24  
25  
26  
27  
28  
29  
30  
31  
32  
33

34 The positive parenting practices that support children's development are well established [11]  
35 and these include relationship building strategies through time spent in play or joint activities  
36 with children, praise and reward to encourage positive child behaviour and positive parental  
37 role modelling [12]. However, evidence-based support for parents is not universally available  
38 and changing demands on parents make it important to provide all parents with access to  
39 evidence-based information.  
40  
41  
42  
43  
44  
45  
46  
47  
48

49 Technology has the potential to provide knowledge about key parenting skills, reduce  
50 pressures on services; particularly those delivered by health visitors and school nurses, and  
51 offer flexible access [13, 14, 15]. Access to technology is now feasible for many parents due  
52 to increased availability of the internet [16]. In 2016, 89% of households in Great Britain  
53  
54  
55  
56  
57  
58  
59  
60

1  
2  
3 (23.7million) had access to the internet, an increase from 86% in 2015 [17]. The majority of  
4  
5 parents (75%) now use social media to obtain parent-related information [18] with over eight  
6  
7 million people visiting an online parenting information and advice website every month [19].  
8  
9

10  
11 The accessibility and convenience of access to the web has introduced the opportunity for  
12  
13 web-based delivery preventive behavioural interventions for health promotion [20, 21].

14  
15 Accessing the internet has become easier with cheaper internet providers and the availability  
16  
17 of devices such as mobile phones and tablets. The internet provides individuals with a useful  
18  
19 source of advice and/or support, and offers convenient and flexible access within the home.  
20  
21

22  
23 This has the potential to reduce the burden on health care service providers [22].  
24  
25

26  
27 Although limited in number, web-based interventions have been shown to be effective in  
28  
29 achieving a wide range of positive outcomes to promote healthy behaviours including  
30  
31 smoking cessation and weight-loss [23, 24, 25], suggesting that the web is an effective means  
32  
33 of providing behaviour change advice. There is evidence demonstrating increased positive  
34  
35 parenting following web-based interventions [26], however, high attrition rates have been  
36  
37 reported [27], with many participants starting, but not completing programmes [13].  
38  
39

40  
41 Universal parenting programmes in general, including web-based, have not yet been  
42  
43 extensively researched [28]. Early indications have suggested potential benefits of web-based  
44  
45 support [26] however more research is needed.  
46  
47

## 48 49 **Rationale**

50  
51 The Coping (**C**onfident **P**arent **I**nternet **G**uide) web based parenting programme, is based on  
52  
53 the content of 'The Little Parent Handbook' [12], and provides information and activities  
54  
55 based on core social learning theory principles associated with positive parenting practices  
56  
57  
58  
59  
60

1  
2  
3 and good child outcomes to parents of children aged 3-8 years. The study will explore the  
4  
5 delivery of the programme, parental satisfaction and engagement with the programme and  
6  
7 whether it is effective in demonstrating increased use of positive parental practices in parents  
8  
9 of children with a wide age range and varying behavioural patterns.  
10

### 11 12 13 **Aims and Objectives**

14  
15 The aim of this trial is to conduct a pilot randomised controlled trial on the effectiveness of  
16  
17 an online parenting programme, for parents of children aged 3-8 years who would like to  
18  
19 learn more about positive parenting by comparing outcomes for intervention and wait-list  
20  
21 control conditions.  
22

23  
24  
25  
26 The key objectives are to establish whether the programmes successfully engages and retains  
27  
28 parents; whether the programme produces statistically significant increases in positive  
29  
30 parenting as observed in a parent-child observation when compared to wait-list control  
31  
32 parents; and to determine whether the online programme produces any changes in secondary  
33  
34 outcomes (parent-reported child behaviour, parent self-reported sense of competence,  
35  
36 behaviour and mental health). The study hypotheses are:  
37  
38

- 39  
40  
41  
42 i. the online parenting programme will lead to significant increases in the use of  
43  
44 positive parenting strategies as displayed in the behavioural observation coded  
45  
46 using Dyadic Parent-Child Interaction Coding System [29]  
47  
48 ii. the online programme will significantly increase positive self-reported  
49  
50 parenting skills, parental sense of competence and parental mental health  
51  
52  
53 iii. the online programme will lead to reduction in parent-reported levels of child  
54  
55 problem behaviour as reported using the Eyberg Child Behaviour Inventory  
56  
57 [30]  
58  
59  
60



## Methods/Design

### Trial design

This pilot RCT will explore the effectiveness of an online parenting programme. Parents of children aged 3-8 years who would like to learn more about positive parenting will be randomly allocated to the intervention condition with immediate access to the programme or to a 3-month wait-list control condition on a 2:1 ratio. Self-report and observational data will be collected in parents' homes during home visits and parents will access the programme at home.

### Eligibility criteria

To be eligible for the study parents must have a child aged between 3-8 years, be able to understand English (as the programme is only currently available in English) and be able to access the internet on a PC, laptop or tablet. The software does not yet support smartphones. Parents who are currently receiving support from services are also invited to participate (they will be asked to record which services they are receiving and the duration). Individuals will be excluded from the study if a parent does not have a child aged between 3-8 years, does not understand English and does not have access to the internet.

### Recruitment

Health visitors and school nurses in Gwynedd and Anglesey (North-West Wales) will approach parents of children aged 3-8 years on their own caseloads and describe the online programme and the research trial. If parents decide that they might want to sign up for the study, they will be asked by the health visitor/school nurse to complete a note of interest form, that will be sent to the research office at Bangor University, giving consent for a member of the research team to contact the parent.

1  
2  
3 On receipt of the note of interest form, a member of the research team will contact the parent  
4  
5 to arrange a convenient time to visit and discuss the project further. The researcher will go  
6  
7 through the information sheet with the parent during this home visit and ensure that any  
8  
9 questions are answered. If the parent is happy to continue, the researcher will obtain informed  
10  
11 consent from the parent to participate in the study. Only when consent has been obtained will  
12  
13 the researcher proceed to ask the parent to fill out the self-report measures and take part in a  
14  
15 30-minute behavioural observation.  
16  
17  
18  
19

20  
21 In addition to health visitors and school nurses approaching parents on their caseloads,  
22  
23 recruitment posters will be distributed in primary schools and nurseries in Gwynedd,  
24  
25 Anglesey, Conwy and Denbighshire. An e-mail address and a contact telephone number will  
26  
27 be provided on the recruitment poster so that interested parents can contact the research team  
28  
29 directly. Parents will either be sent a detailed information sheet via e-mail or the researcher  
30  
31 will discuss the study in depth over the telephone. If parents would still like to participate,  
32  
33 arrangements will then be made for a home visit to discuss the study further. Similarly,  
34  
35 parents who hear about the study through word of mouth can contact the research team for  
36  
37 further information regarding the trial.  
38  
39  
40  
41  
42

43 It is expected that both forms of recruitment (poster and health visitor/ school nurse) will  
44  
45 attract parents from varying socioeconomic backgrounds who are experiencing varying levels  
46  
47 of child problem behaviour. For the purpose of this pilot trial, baseline characteristics of all  
48  
49 parents will be reported and compared with the population as a whole. Additionally, the  
50  
51 percentage of parents recruited from each source will be reported and their characteristics  
52  
53 compared in order to explore the effects of the intervention for the whole sample.  
54  
55  
56  
57  
58  
59  
60

## Intervention

Trials conducted by Hutchings and colleagues during the 1990s [31, 32] with parents and health visitors demonstrated positive outcomes from teaching effective behavioural strategies to parents of children with challenging behavior for both clinically referred and pre-school prevention populations. Significant overall improvements were found for intervention families on measures of child behaviour, parenting practices and maternal mental health [31, 33]. As part of these trials intervention parents were provided with help sheets that were subsequently published as 'The Little Parent Handbook' [12]. These trials were multi-component trials and so it is difficult to establish the true extent of the effectiveness of the parent help-sheets, however they contained the evidence based behavioural principles on which the interventions were based.

The LifeGuide software, developed at the University of Southampton [34], was used in the creation of the online parenting programme. The aim of LifeGuide is to continuously develop, evaluate and disseminate a set of tools that will allow researchers to flexibly create and modify online behaviour change interventions [35]. LifeGuide software allows researchers to deliver behavioural principles both through programme delivery (text message prompts etc.) and programme content (The Little Parent Handbook).

Features of the online parenting programme include automated feedback based on individual performance, online praise messages for spending time with their child, text message reminders to access the next session, and multiple-choice quizzes to test knowledge. The programme also enables the tracking of individual usage data (which can be extracted into Microsoft Excel), including the number of log in, time spent on each page and the number of chapters completed.

1  
2  
3 The programme introduces evidence-based behavioural principles that have been shown to be  
4 effective in strengthening parent-child relations and encouraging positive child behaviour  
5 [36]. A small-scale feasibility study of the online parenting programme was conducted at the  
6 end of 2015 with the aim of providing user feedback prior to conducting this pilot RCT trial.  
7  
8 The study had no measures and participants were not randomised, instead twenty participants  
9 were asked to complete the intervention and fill out a feedback form. Overall, feedback was  
10 very positive with the majority of participants reporting that they would recommend the  
11 programme to parents of children aged 3-8 years. Minor modifications were made based on  
12 the feedback, these include text message prompting to remind parents to log-in to subsequent  
13 sessions, more video examples of positive parenting and the option to look back over  
14 previously completed chapters again. The intervention consists of ten chapters, eight content  
15 and two revision chapters. The topics are:

- 31 i. Spending special time with your child through play
- 32 ii. Encouraging good behaviour through praising
- 33 iii. Encouraging good behaviour through rewarding
- 34 iv. How to get better at giving instructions [part 1]
- 35 v. How to get better at giving instructions [part 2]
- 36 vi. Revision [a review of chapters 1-5]
- 37 vii. Ignoring problem behaviour
- 38 viii. Teaching your child new behaviours
- 39 ix. How to develop your child's language skills
- 40 x. Revision [a review of chapters 1-9]

1  
2  
3 Intervention parents will be provided with a link to the website and a username and  
4  
5 password. Contact details of an administrator will be provided in case any parent requires  
6  
7 technical support during the programme. Parents will be asked to log in and complete one  
8  
9 chapter each week, each chapter will take approximately thirty minutes to complete. The  
10  
11 software ensures that parents have completed each chapter before they can move on to the  
12  
13 next one; they are not required to complete the chapter in one sitting. Log in details allow  
14  
15 parents to access the programme as many times as they wish. The intervention has been  
16  
17 programmed to take parents to the last page that they viewed on the next occasion that they  
18  
19 log in to avoid parents having to start the programme from the beginning. In order to give  
20  
21 parents sufficient time to practice the principles outlined in the individual chapters, the  
22  
23 intervention has been programmed so that there will be a minimum five-day gap between  
24  
25 each chapter. If parents log in before the five days have elapsed, they will be offered the  
26  
27 opportunity to look back over previously completed chapters again.  
28  
29  
30  
31  
32  
33

34 The programme asks parents to practice the skills presented in the chapter with their child at  
35  
36 home. Each chapter concludes with a suggested practice activity. Parents are also encouraged  
37  
38 to keep paper records detailing their activities. Parents can also record online each week how  
39  
40 many times they have played with their child by selecting the amount of times from a drop-  
41  
42 down menu. The programme encourages parents to spend more time playing with their child  
43  
44 in order to strengthen their relationship, and they are continuously reminded to engage in this  
45  
46 activity throughout the programme both by praise messages and by being prompted to record  
47  
48 the amount of time spent playing. A praise message congratulates the parent for spending  
49  
50 time with their child if they report spending time with their child during the past week, or  
51  
52 since the last time they logged in. If parents do not report having spent time with their child  
53  
54  
55  
56  
57  
58  
59  
60

1  
2  
3 during the past week, a prompt message appears reminding them of the importance of this  
4  
5 activity.  
6  
7

8  
9  
10 Each chapter covers an individual behavioural principle that aims to strengthen the parent-  
11 child relationship. Parents read through information (or listen via an audio button if they  
12 prefer) and watch video examples of positive parenting. The video clips are short in length  
13 (all are less than one minute long) allowing the opportunity for multiple viewing. At the end  
14 of each chapter there is a longer video and parents are asked to answer three questions based  
15 on the video clip (by selecting yes or no) in order to develop their observational skills and to  
16 encourage them to identify positive child behaviours. For example, at the end of chapter two  
17 (praising positive behaviour) parents are prompted to watch a video of a parent giving her  
18 child a specific labelled praise, and then answering three questions based on the video; (1)  
19 did the parent praise the child immediately? (2) Was the parent close to the child when  
20 praising? (3) Did the parent share positive feelings when praising? A score out of three and  
21 the correct answers are provided for the responses to the videos. Each chapter ends with a  
22 multiple-choice quiz to test parents' knowledge and understanding of key principles. Parents  
23 will be given online automated feedback based on their quiz scores in addition to the correct  
24 answers. Parents also have an option to download and print a summary sheet for each  
25 chapter.  
26  
27  
28  
29  
30  
31  
32  
33  
34  
35  
36  
37  
38  
39  
40  
41  
42  
43  
44  
45  
46

47 Parents will be given an opportunity to receive text message prompts to help keep them on  
48 track. If they would like to receive text messages, they will be asked at the beginning of the  
49 programme to enter their mobile phone number. The programme is fully automated, and the  
50 research team will have no contact with parents during the intervention. The centre  
51 administrator can be contacted if parents require any technical assistance during the study. A  
52  
53  
54  
55  
56  
57  
58  
59  
60

1  
2  
3 text message will be sent five days after the completion of a chapter informing the parent that  
4  
5 the next chapter is now available. If the parent has not logged into the programme to  
6  
7 complete the next chapter three days after it becomes available, a reminder text will be sent  
8  
9 prompting them to log in and complete the next chapter. If a parent still has not logged in,  
10  
11 weekly reminders will be sent. LifeGuide does not allow researchers to track how many  
12  
13 messages parents have received, however, researchers will calculate the number of text  
14  
15 messages each participant has received depending on the programme schedule, e.g. if a  
16  
17 parent has not logged on after three days of the chapter becoming available they will have  
18  
19 received one text message, etc. Therefore it will be possible to monitor the level of prompting  
20  
21 each participant receives.  
22  
23  
24  
25  
26

27  
28 Baseline data will be collected prior to randomisation and, once completed, intervention  
29  
30 parents will receive a notification of their status and their log in details, whilst parents in the  
31  
32 wait-list control group will be informed that they will have access to the programme after  
33  
34 three months. Follow up data will be collected after three months regardless of whether  
35  
36 intervention parents have completed the programme. Once post-intervention data has been  
37  
38 collected, control parents will receive their log in details for the programme. On completion  
39  
40 of both baseline and follow-up visits, families will receive a children's book as a thank you  
41  
42 for their time. On completion of all measures, parents will receive a copy of 'The Little  
43  
44 Parent Handbook'. Data collection will begin in April 2016 and end in February 2017.  
45  
46  
47  
48

### 49 **Primary measure**

50  
51 The primary outcome is to establish whether the online parenting programme produces  
52  
53 significant changes in positive parenting practices from baseline to follow-up as recorded  
54  
55 using the DPICS. The researcher will observe the parent and child engaging in child-led play  
56  
57  
58  
59  
60

1  
2  
3 for thirty minutes. This coding system was specifically designed to assess the quality of  
4  
5 parent-child social interaction [37]. The DPICS has demonstrated high inter-rater reliability  
6  
7 for parent and child behaviours,  $r = 0.67$  to 1.0 and  $r = 0.76$  to 1.0 respectively [37]. Direct  
8  
9 observation was selected as the primary outcome as direct observational methods provide a  
10  
11 more precise account of behaviour defined by the researcher and not the parent [38].  
12  
13 Additionally, this observational measure has been used in a number of previous studies at the  
14  
15 centre [39, 32, 40].  
16  
17  
18  
19

20  
21 There are eight DPICS parent categories summarised in terms of positive and negative  
22  
23 parenting. Positive parenting categories comprise of direct command, labelled praise,  
24  
25 unlabelled praise and descriptive commenting/verbal labelling. Negative parenting categories  
26  
27 comprise of indirect command, questions, critical statement and negative command. No child  
28  
29 categories will be recorded; child behaviour will be measured using the parent report ECBI  
30  
31 only, as the main purpose of this study is to see whether the intervention has an affect on  
32  
33 parental behaviour. Observational coding is continuous and records the total frequency of  
34  
35 each category of parent behaviour for a total of thirty minutes. Inter-rater levels of reliability  
36  
37 will be assessed for 20% of all observations at all three-time points.  
38  
39  
40  
41  
42

### 43 **Secondary measures**

44  
45 The following secondary outcomes will be collected at three time points by the research team  
46  
47 for the intervention group and at two time points for the wait-list control group.

- 48  
49 • Child behaviour as measured by the Eyberg Child Behaviour Inventory [30]. This  
50  
51 measure is a 36-item inventory completed by the parent to assess the frequency and  
52  
53 intensity of child behavioural problems for children aged 2-16 years, and has been  
54  
55 used in many previous trials including several that have been conducted at the centre  
56  
57  
58  
59  
60



1  
2  
3 [39, 31]. Factor analyses of the ECBI for both children and adolescents indicate that it  
4 is a uni-dimensional measure of conduct problem behaviours [30].  
5  
6

- 7  
8 • Parenting practices as measured by the Arnold O’Leary Parenting Scale [41]. This is a  
9 30-item inventory with three subscales measuring parental behaviour: laxness, over-  
10 reactivity and verbosity. Responses are recorded on a seven-point scale with two  
11 alternative responses to a particular parental situation. The parenting scale has been  
12 shown to exhibit adequate internal validity and test-retest reliability [41] in addition to  
13 demonstrating significant correlations with observational measures of child problem  
14 behaviour [41].  
15  
16
- 17 • Parental confidence as measured by the Parental Sense of Competence questionnaire  
18 [42]. This 17-item likert-scale questionnaire measures competence on two separate  
19 dimensions: satisfaction and efficacy. The satisfaction questions measure parental  
20 anxiety, motivation and frustration (for example, ‘sometimes I feel like I’m not  
21 getting anything done’) and the efficacy question examine competence, capability  
22 levels and problem-solving skills (for example, ‘I meet my own personal expectations  
23 for expertise in caring for my child’) in relation to parenting [42]. Ohan, Leung and  
24 Johnston [43] replicated the factor structure of the Parenting Sense of Competence  
25 Scale produced by Johnston and Mash [42], and provided evidence that the  
26 satisfaction and efficacy scales from this measure assess distinct aspects of parenting  
27 self-esteem.  
28  
29
- 30 • Parental mental health as measured by the General Health Questionnaire [44]. This is  
31 a 30-item questionnaire and each item invites one of four responses in order to assess  
32 psychiatric symptoms including social dysfunction, sleeping patterns and depression  
33 [45]. The responses include ‘better than usual’, ‘same as usual’, ‘less than usual’ and  
34 ‘much less than usual’ to questions such as ‘have you found everything getting on top  
35  
36  
37  
38  
39  
40  
41  
42  
43  
44  
45  
46  
47  
48  
49  
50  
51  
52  
53  
54  
55  
56  
57  
58  
59  
60

1  
2  
3 of you?’ and ‘have you been getting edgy and bad tempered?’ This measure was used  
4  
5 as research has demonstrated the association between maternal mental health and  
6  
7 child conduct problems [46]. Reliability coefficients of the questionnaire have ranged  
8  
9 from 0.78 to 0.95 in various studies [47]. There have been several factor analyses of  
10  
11 the GHQ-30 in relatively large community samples [46].  
12  
13

### 14 15 16 **Demographic information**

17  
18 Demographic information will be collected from all participants at baseline prior to  
19  
20 randomisation. The demographic questionnaire is based on the ‘Personal Development and  
21  
22 Health Questionnaire’ [48] and will include data on socioeconomic status, including poverty,  
23  
24 parental educational level and single-parent status. The questionnaire will cover the following  
25  
26 information:  
27  
28

29  
30  
31 Age of parent and child, gender of parent and child, child diagnosis, parent’s relationship to  
32  
33 the child (biological or non-biological parent), parent’s age at birth of first child, how many  
34  
35 children the parent has, ages of all children, parent’s current relationship status, partner’s  
36  
37 relationship to the child, housing situation, employment status, income, parent’s level of  
38  
39 education and whether they have previously attended a parenting course. An additional  
40  
41 question regarding their internet usage is also included.  
42  
43  
44  
45  
46

### 47 48 **Data Collection**

49  
50 Members of the research team will collect parental self-report measures and observational  
51  
52 data on parent-child interaction using the DPICS behaviour coding system, during home  
53  
54 visits at baseline and follow-up. There is a possibility that parents will drop out of the  
55  
56 programme before the end; nonetheless all efforts will be made by researchers to collect  
57  
58  
59  
60

1  
2  
3 follow-up data in the form of telephone contact and appointment letters. Parents will also be  
4  
5 asked to complete a short feedback/satisfaction questionnaire at the end of the study to share  
6  
7 their views of the programme.  
8  
9

10  
11 The DPICS has been used in a number of studies evaluating parenting programmes [39, 41,  
12  
13 47]. Research team members are already trained in DPICS coding and have reached 80%  
14  
15 inter-rater reliability across all categories. At least two coders, to establish inter-rater  
16  
17 reliability, will code 20% of observations at each time-point simultaneously (baseline and  
18  
19 follow-up). Frequent practice sessions and meetings will be held to discuss any matters  
20  
21 arising and to ensure maintenance of a minimum level of 80% reliability.  
22  
23  
24  
25

### 26 27 **Sample Size**

28  
29 The intention is to enroll 60 parents of children aged 3-8 years (40 to intervention and 20 to  
30  
31 wait-list control, randomised on a 2:1 ratio). Due to limited funds and time restrictions  
32  
33 associated with recruitment and data collection, a larger sample size would be difficult to  
34  
35 recruit within the time frame. Additionally, this is a pilot RCT with the aim of exploring  
36  
37 initial outcomes (in terms of measures, delivery and acceptance of the programme) with a  
38  
39 view to conducting a larger scale trial in the future. Results from this pilot trial will give  
40  
41 researchers initial information regarding acceptability and delivery of the programme with  
42  
43 parents of children aged 3-8 years and should be sufficient to explore initial outcomes in  
44  
45 terms of encouragement in the use of positive parental strategies that would inform a power  
46  
47 calculation for a larger definitive study.  
48  
49  
50

### 51 52 53 **Randomisation**

1  
2  
3 Once all of the data for individual parents have been collected at baseline, parents will be  
4  
5 randomised to either the intervention or a wait-list control condition on a 2:1 ratio. This  
6  
7 allows for the evaluation of a larger intervention sample whilst also reducing the number of  
8  
9 parents waiting for the intervention. This design is favoured for research in this field [39]. A  
10  
11 control condition was favoured over an alternative treatment condition as the researchers  
12  
13 wanted to ensure that all participants received access to the intervention. The randomisation  
14  
15 will be stratified according to child age (3-5 and 6-8 years old) and gender (male and female)  
16  
17 using the online software ‘sealed envelope’. The centre administrative assistant will  
18  
19 undertake the randomisation process, which will require entering the participant identification  
20  
21 number, child age and child gender. The software will then generate the decision on whether  
22  
23 the participant has been allocated to the intervention (group 1) or control (group 2) condition.  
24  
25 Parents will receive a letter from the administrator informing them of their group allocation  
26  
27 and intervention parents will receive the link to the website and their log in details with this  
28  
29 letter. Control parents will be informed that they will receive their log in details upon  
30  
31 completion of the second home visit (post-intervention data).  
32  
33  
34  
35  
36  
37

38 *(Insert Figure 1 here)*  
39  
40  
41  
42

### 43 **Blinding**

44  
45 Baseline measures will be completed prior to randomisation and parents will be asked (during  
46  
47 home visits) not to reveal their group allocation to researchers in order, as far as possible, to  
48  
49 keep the researchers blind to parent group allocation. However, some parents may reveal  
50  
51 their allocation during the first follow-up home visit. In this instance, researchers will make a  
52  
53 record of this. Due to the design of the study, it will not be possible to keep the researchers  
54  
55 blind to group allocation at the six-month follow-up stage as they will only involve  
56  
57  
58  
59  
60

1  
2  
3 intervention parents. However the key measures are parent report questionnaires and the  
4  
5 frequency based behavioural observation that incorporates inter-rater reliability. If high levels  
6  
7 of unmasking occur, a variable will be added to the analysis to control for this.  
8  
9

### 10 11 12 **Statistical Analysis**

13  
14 Baseline characteristics for all parents and children will be analysed and checked for  
15  
16 differences (if any) between the intervention and wait-list control conditions. Any differences  
17  
18 will be recorded and accounted for in the analysis. ANCOVA will be the main analysis  
19  
20 method used to compare the intervention and wait-list control conditions. Any missing data  
21  
22 will be treated using multiple imputation, a relatively flexible, general-purpose approach to  
23  
24 dealing with missing data [49].  
25  
26  
27  
28  
29  
30  
31

### 32 **Discussion**

33  
34 This trial will provide information on the effectiveness of an online parenting programme, an  
35  
36 intervention designed to increase positive parenting for parents of children aged 3-8 years.  
37  
38 The effects of the intervention on child behaviour, parenting behaviour, parental mental  
39  
40 health and parental sense of competence will also be assessed. It is hypothesised that the  
41  
42 online programme will encourage parents to use positive parenting strategies, including  
43  
44 spending more time with their child and praising and rewarding positive child behaviour.  
45  
46 Additionally, it is hypothesised that the online programme will improve a range of outcomes  
47  
48 including self-reported parenting practices, parental mental health, parental confidence and  
49  
50 child behaviour.  
51  
52  
53  
54  
55  
56  
57  
58  
59  
60

1  
2  
3 This project is timely when considering the current situation with regards to rising numbers  
4  
5 of children displaying behaviour problems [7], challenges faced by all parents and the known  
6  
7 impact of parenting style on the establishment and maintenance child behaviour problems  
8  
9 [47, 50, 12]. This programme could potentially be useful to parents who would like to receive  
10  
11 additional support, but who are not living in targeted areas (such as Flying Start areas in  
12  
13 Wales) where higher levels of parenting support are provided. A preventative universal  
14  
15 programme available to all parents could potentially allow health care professionals more  
16  
17 time and resources to target clinical (or at-risk) populations and also encourage parents to use  
18  
19 well established positive parenting strategies to prevent child behaviour problems from  
20  
21 forming. A universal preventative programme such as this could be useful in encouraging  
22  
23 positive parenting practices for all parents and reduce the number of families seeking advice  
24  
25 for whom no service currently exists [51].  
26  
27  
28  
29  
30  
31

### 32 **Ethics and dissemination**

33  
34 The trial has received ethical approval from the NHS Betsi Cadwaladr University Health  
35  
36 Board Ethics Committee (REC) and the School of Psychology, Bangor University REC  
37  
38 (15/WA/0463). Publication of all outcomes will be in peer-reviewed journals and conference  
39  
40 presentations.  
41  
42  
43  
44

45 Parents recruited to the trial will be notified of the results by means of a letter, and  
46  
47 researchers will verbally present the findings to healthcare professionals who helped with  
48  
49 recruitment. If the trial suggests that there are significant benefits, this would inform a bid for  
50  
51 funding for a larger definitive RCT with the goal that the intervention could subsequently be  
52  
53 made available to parents in general as a preventative programme.  
54  
55  
56  
57  
58  
59  
60

**Trial status**

The trial is currently on going. Baseline and 3-month follow-up measures for all parents were completed in October 2016. Data is currently being collected for the 6-month follow-up of intervention parents.

**Abbreviations**

NICE: The National Institute for Health and Care Excellence; ONS: Office for National Statistics, ANCOVA; Analysis of Covariance; REC: Research Ethics Committee

**Author's contributions**

DAO: designing of the online programme, manuscript writing, gaining ethical approval, data collection, data analysis, critical revision and final approval of manuscript. NG: critical revision and final approval of manuscript. JH: author of 'The Little Parent Handbook', critical revision and final approval of manuscript.

**Competing interests:** The third author [JH] is the author of 'The Little Parent Handbook.'

## References

1. Palmer S. *Toxic Childhood: How the modern world is damaging our children and what we can do about it*. Orion. 2006.
2. Amato P. The consequences of divorce on adults and children. *Journal of Marriage and Family* 2000; 62 (4); 1269-1287.
3. Cherlin A, Furstenberg F, Chase-Lansdale P et al. Longitudinal studies of effects of divorce on children in Great Britain and the United States. *Science* 1991; 252(5011); 1386-1389.
4. Smith J, Dishion T, Shaw D et al. Coercive family process and early-onset conduct problems from age 2 to school entry. *Developmental psychopathology* 2014; 26(4); 917-932.
5. Nixon R. Treatment of behaviour problems in pre-schoolers: A review of parent training programs. *Clinical Psychology Review* 2002; 22; 525-546.
6. Knapp M, McCrone P, Fombonne E, et al. The Maudsley long-term follow-up of child and adolescent depression. *The British Journal of Psychiatry* 2002; 180(1); 19-23.
7. National Institute for Health and Care Excellence. Antisocial behaviour and conduct disorders in children and young people: recognition and management. Retrieved from <https://www.nice.org.uk/guidance/cg158> (Accessed May 2013).
8. Foster E, & Jones D. The high costs of aggression: Public expenditures resulting from conduct disorder. *American Journal of Public Health* 2005; 95(10); 1767-1772.
9. Wilson P, Furnivall J, Barbour R, et al. The work of health visitors and school nurses with children with psychological and behavioural problems. *Journal of advanced nursing* 2008; 61(4); 445-455.
10. Williams M, & Hutchings J. Health visitor feedback on a structured, behavioural training for working with families of children with behaviour problems. Manuscript submitted for publication. 2017.
11. Gardner F, Burton J, & Kilmes I. Randomised controlled trial of a parenting intervention in the voluntary sector for reducing child conduct problems: Outcomes and mechanisms of change. *Journal of Child Psychology and Psychiatry* 2006; 47(11); 1123-1132.
12. Hutchings J. The Little Parent Handbook. *Children's Early Intervention Trust; Bangor* 2013.



13. Wantland D, Portillo C, Holzemer W, et al. The effectiveness of a web-based versus non web-based interventions: A meta-analysis of behavioural change outcomes. *Journal of Medical Internet Research* 2004; 6(4).
14. Bert S, Farris J, & Borkowski J. Parent training: Implementation strategies for adventures in parenting. *The Journal of Primary Prevention* 2008; 29; 243-261.
15. Jones D, Forehand R, Cuellar J, et al. Technology-enhanced programme for child disruptive development and pilot randomized control trial. *Journal of Clinical Child and Adolescent Psychology* 2014; 43(1); 88-101.
16. Office for National Statistics. Statistical Bulletin. Internet Access – Households and Individuals. London: Office for National Statistics 2013.
17. Office for National Statistics. Statistical Bulletin. Internet access- households and individuals 2016. London: Office for National Statistics 2016.
18. Duggan M, & Lenhart A. Parents and social media. Pew Research Centre. Retrieved from <http://www.pewinternet.org/2015/07/16/parents-and-social-media/> (accessed May 2015).
19. Netmums. Retrieved from <https://netmums.com/home/about-us> (accessed June 6th 2016).
20. Elgar F, & McGrath P. Self-administered psychosocial treatments for children and families. *Journal of Clinical Psychology* 2003; 59(3); 321-339.
21. Taylor T, Webster-Stratton C, Feil E et al. Computer-based intervention with coaching: An example using the Incredible Years Programme. *Cognitive Behaviour Therapy* 2008; 37(4); 233-246.
22. Copeland J, & Martin G. Web-based interventions for substance use disorders: A qualitative review. *Journal of substance abuse treatment* 2004; 26(2); 109-116.
23. Strecher V, McClure J, Alexander G, et al. The role of engagement in a tailored web-based smoking cessation programme: Randomised controlled trial. *Journal of Medical Internet Research* 2008; 10(5)
24. Hustad J, Barnett N, Borsari B, et al. Web-based alcohol prevention for incoming college students: A randomized controlled trial. *Addictive Behaviours* 2010; 35(3); 183-189.
25. Brown J, Michie S, Geraghty A, et al. Internet-based intervention for smoking cessation (StopAdvisor) in people with low and high socioeconomic status: a randomised controlled trial. *The Lancet Respiratory Medicine* 2014; 2(12); 997-1006.
26. Enebrink P, Högström J, Forster M, et al. Internet-based parent management training: A randomised controlled study. *Behaviour research and Therapy* 2012; 50(4); 240-249.

- 1  
2  
3  
4 27. Arden-Close E, Smith E, Bradbury K, et al. A visualisation tool to analyse usage of  
5 web-based interventions: The example of positive online weight reduction (POWeR).  
6 *JMIR Human Factors* 2015; 2(1)  
7  
8  
9 28. Ulfsdotter M, Enebrink P, & Lindberg L. Effectiveness of a universal health-  
10 promoting parenting program: a randomized waitlist-controlled trial of All Children  
11 in Focus. *BMC public health*, 2012; 14(1); 1083.  
12  
13  
14 29. Eyberg S, & Robison E. Dyadic Parent-Child Interaction Coding System: A Manual.  
15 The Parenting Clinic, University of Washington 1981.  
16  
17  
18 30. Eyberg S, & Robison E. Conduct problem behaviour: Standardisation of behavioural  
19 rating. *Journal of Clinical Child and Adolescent Psychology*, 1983; 12(3); 347-354.  
20  
21  
22 31. Hutchings J, Appleton P, Smith M, et al. Evaluation of two treatments for children  
23 with severe behaviour problems: child behaviour and maternal mental health  
24 outcomes. *Behavioural and Cognitive Psychotherapy* 2002; 30(03); 279-295.  
25  
26 32. Hutchings J, Lane E, & Kelly J. Comparison of two treatments for children with  
27 severely disruptive behaviours: A four-year follow-up. *Behaviour and Cognitive*  
28 *Psychotherapy* 2004; 32; 15-30.  
29  
30  
31 33. Lane E, & Hutchings J. Benefits of a course in behavioural analysis for health  
32 visitors. *British Journal of Nursing* 2002; 11(10); 702-714.  
33  
34 34. Yardley L, Osmond A, Hare J, et al. Introduction to the LifeGuide: software  
35 facilitating the development of interactive behaviour change internet interventions.  
36 *Persuasive technology and digital behaviour intervention symposium*; Edinburgh: GB  
37 2009.  
38  
39 35. Hare J, Osmond A, Yang Y, et al. LifeGuide: A platform for performing web-based  
40 behavioural interventions, *Web-Science: Society On-Line* 2009; 18-20.  
41  
42 36. Cooper J, Heron T, & Heward W. Applied Behaviour Analysis (2<sup>nd</sup> ed.). *Upper*  
43 *Saddle River: NJ* 2007.  
44  
45  
46 37. Robinson E, & Eyberg S. The dyadic parent-child interaction coding system:  
47 Standardization and validation. *Journal of Consulting and Clinical Psychology*  
48 1981; 49(2); 245.  
49  
50  
51 38. Aspland H, & Gardner F. Observational measures of parent-child interaction: An  
52 introductory review. *Child and Adolescent Mental Health* 2003; 8(3); 136-143.  
53  
54 39. Hutchings J, Bywater T, Daley D, et al. Parenting intervention in Sue Start services  
55 for children at risk of developing conduct disorder: pragmatic randomised controlled  
56 trial. *British Medical Journal* 2007; 334(7595), 678.  
57  
58  
59  
60

- 1  
2  
3  
4 40. Eames C, Daley D, Hutchings J. et al. C. The impact of group leaders' behaviour on  
5 parents' acquisition of key parenting skills during parent training. *Behaviour*  
6 *Research and Therapy* 2012; 48(12); 1221-1226.  
7  
8  
9 41. Arnold D, O'Leary S, Wolff L, et al. The Parenting Scale: A measure of  
10 dysfunctional parenting in discipline situations. *Psychological Assessment* 1993; 5(2);  
11 137-144.  
12  
13 42. Johnston C, & Mash E. A measure of parental satisfaction and efficacy. *Journal of*  
14 *Clinical Child Psychology* 1981; 18(2); 167-175.  
15  
16 43. Ohan J, Leung D, & Johnston C. The Parenting Sense of Competence scale: Evidence  
17 of a stable factor structure and validity. *Canadian Journal of Behavioural* 2000;  
18 32(4); 251.  
19  
20 44. Goldberg D. Manual of the General Health Questionnaire. Windsor: England 1978.  
21  
22 45. Huppert F, Walters D, Day N, et al. The factor structure of the General Health  
23 Questionnaire (GHQ-30). A reliability study on 6317 community residents. *The*  
24 *British Journal of Psychiatry* 1989; 155(2); 178-185.  
25  
26 46. Jackson C. The general health questionnaire. *Occupational medicine* 2007; 57(1); 79.  
27  
28 47. Hutchings J, Bywater T, Williams M, et al. Improvements in maternal depression as  
29 a mediator of child behaviour change. *Psychology* 2012; 3(09); 795.  
30  
31 48. Hutchings J. The personal and parental characteristics of preschool children referred  
32 to a child and family mental health service and their relation to treatment  
33 outcome (Doctoral dissertation, University of Wales) 1996.  
34  
35 49. Sterne J, White I, Carlin J, et al. Multiple imputation for missing data in  
36 epidemiological and clinical research: potential and pitfalls. *BMJ*, 2009; 338, b2393.  
37  
38 50. Gardner F, Hutchings J, Bywater T, et al. Who benefits and how does it work?  
39 Moderators and mediators of outcome in an effectiveness trial of a parenting  
40 intervention. *Journal of Clinical Child & Adolescent Psychology* 2010; 39(4), 568-  
41 580.  
42  
43 51. Lingley-Pottie P, & McGrath P. Distance therapeutic alliance: the participant's  
44 experience. *Advances in Nursing Science* 2007; 30(4); 353-366.  
45  
46  
47  
48  
49  
50  
51  
52  
53  
54  
55  
56  
57  
58  
59  
60

Figure legend: Participant flow chart

1  
2  
3  
4  
5  
6  
7  
8  
9  
10  
11  
12  
13  
14  
15  
16  
17  
18  
19  
20  
21  
22  
23  
24  
25  
26  
27  
28  
29  
30  
31  
32  
33  
34  
35  
36  
37  
38  
39  
40  
41  
42  
43  
44  
45  
46  
47  
48  
49  
50  
51  
52  
53  
54  
55  
56  
57  
58  
59  
60



Participant flow chart

209x297mm (300 x 300 DPI)



SPIRIT 2013 Checklist: Recommended items to address in a clinical trial protocol and related documents\*

| Section/item                      | Item No | Description                                                                                                                                                                                                                                                                                                                               |
|-----------------------------------|---------|-------------------------------------------------------------------------------------------------------------------------------------------------------------------------------------------------------------------------------------------------------------------------------------------------------------------------------------------|
| <b>Administrative information</b> |         |                                                                                                                                                                                                                                                                                                                                           |
| Title                             | 1       | Descriptive title identifying the study design, population, interventions, and, if applicable, trial acronym ( <a href="#">page 1</a> )                                                                                                                                                                                                   |
| Trial registration                | 2a      | Trial identifier and registry name. If not yet registered, name of intended registry ( <a href="#">page 2</a> )                                                                                                                                                                                                                           |
|                                   | 2b      | All items from the World Health Organization Trial Registration Data Set ( <a href="#">not applicable</a> )                                                                                                                                                                                                                               |
|                                   | 3       | Date and version identifier ( <a href="#">page 1</a> )                                                                                                                                                                                                                                                                                    |
| Funding                           | 4       | Sources and types of financial, material, and other support ( <a href="#">page 1</a> )                                                                                                                                                                                                                                                    |
| Roles and responsibilities        | 5a      | Names, affiliations, and roles of protocol contributors ( <a href="#">page 1</a> )                                                                                                                                                                                                                                                        |
|                                   | 5b      | Name and contact information for the trial sponsor ( <a href="#">page 1</a> )                                                                                                                                                                                                                                                             |
|                                   | 5c      | Role of study sponsor and funders, if any, in study design; collection, management, analysis, and interpretation of data; writing of the report; and the decision to submit the report for publication, including whether they will have ultimate authority over any of these activities ( <a href="#">page 21</a> )                      |
|                                   | 5d      | Composition, roles, and responsibilities of the coordinating centre, steering committee, endpoint adjudication committee, data management team, and other individuals or groups overseeing the trial, if applicable (see Item 21a for data monitoring committee) ( <a href="#">not applicable – all work carried out by the authors</a> ) |
| <b>Introduction</b>               |         |                                                                                                                                                                                                                                                                                                                                           |
| Background and rationale          | 6a      | Description of research question and justification for undertaking the trial, including summary of relevant studies (published and unpublished) examining benefits and harms for each intervention ( <a href="#">pages 3 – 6</a> )                                                                                                        |
|                                   | 6b      | Explanation for choice of comparators ( <a href="#">page 17-19</a> )                                                                                                                                                                                                                                                                      |
| Objectives                        | 7       | Specific objectives or hypotheses ( <a href="#">page 6</a> )                                                                                                                                                                                                                                                                              |

1  
2  
3  
4  
5  
6  
7  
8  
9  
10  
11  
12  
13  
14  
15  
16  
17  
18  
19  
20  
21  
22  
23  
24  
25  
26  
27  
28  
29  
30  
31  
32  
33  
34  
35  
36  
37  
38  
39  
40  
41  
42  
43  
44  
45  
46  
47  
48  
49  
50  
51  
52  
53  
54

|              |   |                                                                                                                                                                                                                                    |
|--------------|---|------------------------------------------------------------------------------------------------------------------------------------------------------------------------------------------------------------------------------------|
| Trial design | 8 | Description of trial design including type of trial (eg, parallel group, crossover, factorial, single group), allocation ratio, and framework (eg, superiority, equivalence, noninferiority, exploratory) <a href="#">(page 7)</a> |
|--------------|---|------------------------------------------------------------------------------------------------------------------------------------------------------------------------------------------------------------------------------------|

### Methods: Participants, interventions, and outcomes

|               |   |                                                                                                                                                                                                             |
|---------------|---|-------------------------------------------------------------------------------------------------------------------------------------------------------------------------------------------------------------|
| Study setting | 9 | Description of study settings (eg, community clinic, academic hospital) and list of countries where data will be collected. Reference to where list of study sites can be obtained <a href="#">(page 7)</a> |
|---------------|---|-------------------------------------------------------------------------------------------------------------------------------------------------------------------------------------------------------------|

|                      |    |                                                                                                                                                                                                                       |
|----------------------|----|-----------------------------------------------------------------------------------------------------------------------------------------------------------------------------------------------------------------------|
| Eligibility criteria | 10 | Inclusion and exclusion criteria for participants. If applicable, eligibility criteria for study centres and individuals who will perform the interventions (eg, surgeons, psychotherapists) <a href="#">(page 7)</a> |
|----------------------|----|-----------------------------------------------------------------------------------------------------------------------------------------------------------------------------------------------------------------------|

|               |     |                                                                                                                                                         |
|---------------|-----|---------------------------------------------------------------------------------------------------------------------------------------------------------|
| Interventions | 11a | Interventions for each group with sufficient detail to allow replication, including how and when they will be administered <a href="#">(pages 9–13)</a> |
|---------------|-----|---------------------------------------------------------------------------------------------------------------------------------------------------------|

|  |     |                                                                                                                                                                                                                                                          |
|--|-----|----------------------------------------------------------------------------------------------------------------------------------------------------------------------------------------------------------------------------------------------------------|
|  | 11b | Criteria for discontinuing or modifying allocated interventions for a given trial participant (eg, drug dose change in response to harms, participant request, or improving/worsening disease) <a href="#">(no criteria for discontinuing treatment)</a> |
|--|-----|----------------------------------------------------------------------------------------------------------------------------------------------------------------------------------------------------------------------------------------------------------|

|  |     |                                                                                                                                                                                  |
|--|-----|----------------------------------------------------------------------------------------------------------------------------------------------------------------------------------|
|  | 11c | Strategies to improve adherence to intervention protocols, and any procedures for monitoring adherence (eg, drug tablet return, laboratory tests) <a href="#">Not applicable</a> |
|--|-----|----------------------------------------------------------------------------------------------------------------------------------------------------------------------------------|

|  |     |                                                                                                                              |
|--|-----|------------------------------------------------------------------------------------------------------------------------------|
|  | 11d | Relevant concomitant care and interventions that are permitted or prohibited during the trial <a href="#">Not applicable</a> |
|--|-----|------------------------------------------------------------------------------------------------------------------------------|

|          |    |                                                                                                                                                                                                                                                                                                                                                                                                              |
|----------|----|--------------------------------------------------------------------------------------------------------------------------------------------------------------------------------------------------------------------------------------------------------------------------------------------------------------------------------------------------------------------------------------------------------------|
| Outcomes | 12 | Primary, secondary, and other outcomes, including the specific measurement variable (eg, systolic blood pressure), analysis metric (eg, change from baseline, final value, time to event), method of aggregation (eg, median, proportion), and time point for each outcome. Explanation of the clinical relevance of chosen efficacy and harm outcomes is strongly recommended <a href="#">(pages 13-16)</a> |
|----------|----|--------------------------------------------------------------------------------------------------------------------------------------------------------------------------------------------------------------------------------------------------------------------------------------------------------------------------------------------------------------------------------------------------------------|

|                      |    |                                                                                                                                                                                                                             |
|----------------------|----|-----------------------------------------------------------------------------------------------------------------------------------------------------------------------------------------------------------------------------|
| Participant timeline | 13 | Time schedule of enrolment, interventions (including any run-ins and washouts), assessments, and visits for participants. A schematic diagram is highly recommended (see Figure) <a href="#">(insert figure on page 18)</a> |
|----------------------|----|-----------------------------------------------------------------------------------------------------------------------------------------------------------------------------------------------------------------------------|

|             |    |                                                                                                                                                                                                                 |
|-------------|----|-----------------------------------------------------------------------------------------------------------------------------------------------------------------------------------------------------------------|
| Sample size | 14 | Estimated number of participants needed to achieve study objectives and how it was determined, including clinical and statistical assumptions supporting any sample size calculations <a href="#">(page 17)</a> |
|-------------|----|-----------------------------------------------------------------------------------------------------------------------------------------------------------------------------------------------------------------|

|             |    |                                                                                                                 |
|-------------|----|-----------------------------------------------------------------------------------------------------------------|
| Recruitment | 15 | Strategies for achieving adequate participant enrolment to reach target sample size <a href="#">(pages 7-8)</a> |
|-------------|----|-----------------------------------------------------------------------------------------------------------------|

### Methods: Assignment of interventions (for controlled trials)

Allocation:

|    |                |     |                                                                                   |
|----|----------------|-----|-----------------------------------------------------------------------------------|
| 1  |                |     |                                                                                   |
| 2  | Sequence       | 16a | Method of generating the allocation sequence (eg, computer-                       |
| 3  | generation     |     | generated random numbers), and list of any factors for stratification.            |
| 4  |                |     | To reduce predictability of a random sequence, details of any planned             |
| 5  |                |     | restriction (eg, blocking) should be provided in a separate document              |
| 6  |                |     | that is unavailable to those who enrol participants or assign                     |
| 7  |                |     | interventions ( <a href="#">pages 17-18</a> )                                     |
| 8  |                |     |                                                                                   |
| 9  | Allocation     | 16b | Mechanism of implementing the allocation sequence (eg, central                    |
| 10 | concealment    |     | telephone; sequentially numbered, opaque, sealed envelopes),                      |
| 11 | mechanism      |     | describing any steps to conceal the sequence until interventions are              |
| 12 |                |     | assigned ( <a href="#">pages 17-18</a> )                                          |
| 13 |                |     |                                                                                   |
| 14 | Implementation | 16c | Who will generate the allocation sequence, who will enrol participants,           |
| 15 |                |     | and who will assign participants to interventions ( <a href="#">pages 17-18</a> ) |
| 16 |                |     |                                                                                   |
| 17 | Blinding       | 17a | Who will be blinded after assignment to interventions (eg, trial                  |
| 18 | (masking)      |     | participants, care providers, outcome assessors, data analysts), and              |
| 19 |                |     | how ( <a href="#">pages 18-19</a> )                                               |
| 20 |                |     |                                                                                   |
| 21 |                | 17b | If blinded, circumstances under which unblinding is permissible, and              |
| 22 |                |     | procedure for revealing a participant's allocated intervention during             |
| 23 |                |     | the trial ( <a href="#">pages 18-19</a> )                                         |
| 24 |                |     |                                                                                   |
| 25 |                |     |                                                                                   |
| 26 |                |     |                                                                                   |

### Methods: Data collection, management, and analysis

|    |                 |     |                                                                                       |
|----|-----------------|-----|---------------------------------------------------------------------------------------|
| 27 |                 |     |                                                                                       |
| 28 | Data collection | 18a | Plans for assessment and collection of outcome, baseline, and other                   |
| 29 | methods         |     | trial data, including any related processes to promote data quality (eg,              |
| 30 |                 |     | duplicate measurements, training of assessors) and a description of                   |
| 31 |                 |     | study instruments (eg, questionnaires, laboratory tests) along with                   |
| 32 |                 |     | their reliability and validity, if known. Reference to where data                     |
| 33 |                 |     | collection forms can be found, if not in the protocol ( <a href="#">pages 16-17</a> ) |
| 34 |                 |     |                                                                                       |
| 35 |                 | 18b | Plans to promote participant retention and complete follow-up,                        |
| 36 |                 |     | including list of any outcome data to be collected for participants who               |
| 37 |                 |     | discontinue or deviate from intervention protocols ( <a href="#">pages 16-17</a> )    |
| 38 |                 |     |                                                                                       |
| 39 | Data            | 19  | Plans for data entry, coding, security, and storage, including any                    |
| 40 | management      |     | related processes to promote data quality (eg, double data entry;                     |
| 41 |                 |     | range checks for data values). Reference to where details of data                     |
| 42 |                 |     | management procedures can be found, if not in the protocol ( <a href="#">pages</a>    |
| 43 |                 |     | <a href="#">16-17</a> )                                                               |
| 44 |                 |     |                                                                                       |
| 45 | Statistical     | 20a | Statistical methods for analysing primary and secondary outcomes.                     |
| 46 | methods         |     | Reference to where other details of the statistical analysis plan can be              |
| 47 |                 |     | found, if not in the protocol ( <a href="#">page 19</a> )                             |
| 48 |                 |     |                                                                                       |
| 49 |                 | 20b | Methods for any additional analyses (eg, subgroup and adjusted                        |
| 50 |                 |     | analyses) ( <a href="#">page 19</a> )                                                 |
| 51 |                 |     |                                                                                       |
| 52 |                 | 20c | Definition of analysis population relating to protocol non-adherence                  |
| 53 |                 |     | (eg, as randomised analysis), and any statistical methods to handle                   |
| 54 |                 |     | missing data (eg, multiple imputation) ( <a href="#">page 19</a> )                    |
| 55 |                 |     |                                                                                       |
| 56 |                 |     |                                                                                       |
| 57 |                 |     |                                                                                       |
| 58 |                 |     |                                                                                       |
| 59 |                 |     |                                                                                       |
| 60 |                 |     |                                                                                       |



**Methods: Monitoring**

- 1  
2  
3  
4  
5  
6  
7  
8  
9  
10  
11  
12  
13  
14  
15  
16  
17  
18  
19  
20  
21  
22  
23  
24
- |                 |     |                                                                                                                                                                                                                                                                                                                                                             |
|-----------------|-----|-------------------------------------------------------------------------------------------------------------------------------------------------------------------------------------------------------------------------------------------------------------------------------------------------------------------------------------------------------------|
| Data monitoring | 21a | Composition of data monitoring committee (DMC); summary of its role and reporting structure; statement of whether it is independent from the sponsor and competing interests; and reference to where further details about its charter can be found, if not in the protocol. Alternatively, an explanation of why a DMC is not needed <b>Not applicable</b> |
|                 | 21b | Description of any interim analyses and stopping guidelines, including who will have access to these interim results and make the final decision to terminate the trial <b>Not applicable</b>                                                                                                                                                               |
| Harms           | 22  | Plans for collecting, assessing, reporting, and managing solicited and spontaneously reported adverse events and other unintended effects of trial interventions or trial conduct <b>Not applicable</b>                                                                                                                                                     |
| Auditing        | 23  | Frequency and procedures for auditing trial conduct, if any, and whether the process will be independent from investigators and the sponsor <b>(process will not be independent from Bangor University)</b>                                                                                                                                                 |

**Ethics and dissemination**

- 25  
26  
27  
28  
29  
30  
31  
32  
33  
34  
35  
36  
37  
38  
39  
40  
41  
42  
43  
44  
45  
46  
47  
48  
49  
50  
51  
52  
53  
54  
55  
56  
57  
58  
59  
60
- |                          |     |                                                                                                                                                                                                                                                                                                                         |
|--------------------------|-----|-------------------------------------------------------------------------------------------------------------------------------------------------------------------------------------------------------------------------------------------------------------------------------------------------------------------------|
| Research ethics approval | 24  | Plans for seeking research ethics committee/institutional review board (REC/IRB) approval <b>(page 20)</b>                                                                                                                                                                                                              |
| Protocol amendments      | 25  | Plans for communicating important protocol modifications (eg, changes to eligibility criteria, outcomes, analyses) to relevant parties (eg, investigators, REC/IRBs, trial participants, trial registries, journals, regulators) <b>(authors will contact relevant parties if any changes to protocol should occur)</b> |
| Consent or assent        | 26a | Who will obtain informed consent or assent from potential trial participants or authorised surrogates, and how (see Item 32) <b>(page 8)</b>                                                                                                                                                                            |
|                          | 26b | Additional consent provisions for collection and use of participant data and biological specimens in ancillary studies, if applicable <b>Not applicable</b>                                                                                                                                                             |
| Confidentiality          | 27  | How personal information about potential and enrolled participants will be collected, shared, and maintained in order to protect confidentiality before, during, and after the trial <b>(all data will remain confidential before, during and after the trial)</b>                                                      |
| Declaration of interests | 28  | Financial and other competing interests for principal investigators for the overall trial and each study site <b>(page 21)</b>                                                                                                                                                                                          |
| Access to data           | 29  | Statement of who will have access to the final trial dataset, and disclosure of contractual agreements that limit such access for investigators <b>(only the authors will have access to the data)</b>                                                                                                                  |



|    |                   |     |                                                                              |
|----|-------------------|-----|------------------------------------------------------------------------------|
| 1  |                   |     |                                                                              |
| 2  | Ancillary and     | 30  | Provisions, if any, for ancillary and post-trial care, and for               |
| 3  | post-trial care   |     | compensation to those who suffer harm from trial participation <b>Not</b>    |
| 4  |                   |     | <b>applicable</b>                                                            |
| 5  |                   |     |                                                                              |
| 6  | Dissemination     | 31a | Plans for investigators and sponsor to communicate trial results to          |
| 7  | policy            |     | participants, healthcare professionals, the public, and other relevant       |
| 8  |                   |     | groups (eg, via publication, reporting in results databases, or other        |
| 9  |                   |     | data sharing arrangements), including any publication restrictions           |
| 10 |                   |     | <b>(page 20)</b>                                                             |
| 11 |                   |     |                                                                              |
| 12 |                   | 31b | Authorship eligibility guidelines and any intended use of professional       |
| 13 |                   |     | writers <b>Not applicable</b>                                                |
| 14 |                   |     |                                                                              |
| 15 |                   | 31c | Plans, if any, for granting public access to the full protocol, participant- |
| 16 |                   |     | level dataset, and statistical code <b>No plans</b>                          |
| 17 |                   |     |                                                                              |
| 18 |                   |     |                                                                              |
| 19 | <b>Appendices</b> |     |                                                                              |
| 20 |                   |     |                                                                              |
| 21 | Informed consent  | 32  | Model consent form and other related documentation given to                  |
| 22 | materials         |     | participants and authorised surrogates <b>Uploaded with submission</b>       |
| 23 |                   |     |                                                                              |
| 24 | Biological        | 33  | Plans for collection, laboratory evaluation, and storage of biological       |
| 25 | specimens         |     | specimens for genetic or molecular analysis in the current trial and for     |
| 26 |                   |     | future use in ancillary studies, if applicable <b>Not applicable</b>         |
| 27 |                   |     |                                                                              |

---

28 \*It is strongly recommended that this checklist be read in conjunction with the SPIRIT 2013  
 29 Explanation & Elaboration for important clarification on the items. Amendments to the  
 30 protocol should be tracked and dated. The SPIRIT checklist is copyrighted by the SPIRIT  
 31 Group under the Creative Commons "[Attribution-NonCommercial-NoDerivs 3.0 Unported](https://creativecommons.org/licenses/by-nc-nd/3.0/)"  
 32 license.  
 33  
 34  
 35  
 36  
 37  
 38  
 39  
 40  
 41  
 42  
 43  
 44  
 45  
 46  
 47  
 48  
 49  
 50  
 51  
 52  
 53  
 54  
 55  
 56  
 57  
 58  
 59  
 60



COLEG GWYDDORAU IECHYD AC YMDDYGIAD  
COLLEGE OF HEALTH AND BEHAVIOURAL SCIENCES

YSGOL SEICOLEG  
SCHOOL OF PSYCHOLOGY

**Study Participant Identification Number:**

**PARENT CONSENT FORM**

Title of the Project: Evaluation of an online parenting programme based on 'The Little Parent Handbook'

Name of Researcher: \_\_\_\_\_

Please initial box

- 1. I confirm that I have read the information sheet dated..... for the above study. I have had the opportunity to consider the information provided and have had questions answered satisfactorily by the researcher.
- 2. I understand that my participation in this research study is voluntary and that I am free to withdraw at any time without having to give an explanation, without my legal rights being affected.
- 3. I understand that the researcher will ask me to fill out questionnaires.
- 4. I understand that the researcher will undertake a 30-minute observation of myself interacting with my child.
- 5. I understand that I will be asked to keep on-going weekly records about my child.
- 6. I understand that I will need an internet connection in order to participate in this online study.
- 7. I understand that the study will last for 10 weeks and I will have one week to complete each section of the online programme.
- 8. I understand that all information will be kept confidential unless any matter(s) regarding child protection issues arise.
- 9. I agree to take part in the above study.

|                          |
|--------------------------|
| <input type="checkbox"/> |

Name of participant:

Date:

Signature:

\_\_\_\_\_

\_\_\_\_\_

\_\_\_\_\_

Name of person taking consent:

Date:

Signature:

\_\_\_\_\_

\_\_\_\_\_

\_\_\_\_\_

PRIFYSGOL BANGOR  
ADEILAD BRIGANTIA,  
FFORDD PENRALLT,  
BANGOR, GWYNEDD, LL57 2AS

BANGOR UNIVERSITY  
BRIGANTIA BUILDING,  
PENRALLT ROAD,  
BANGOR, GWYNEDD, LL57 2AS

ATHRO/PROFESSOR JOHN PARKINSON BA, PhD  
PENNAETH YR YSGOL/HEAD OF SCHOOL

EBOST: [seicoleg@bangor.ac.uk](mailto:seicoleg@bangor.ac.uk)  
EMAIL: [psychology@bangor.ac.uk](mailto:psychology@bangor.ac.uk)

FFÔN: (01248) 382211

TEL:(01248) 382211  
**Registered charity number:**  
**1141565**

[www.bangor.ac.uk](http://www.bangor.ac.uk) [www.bangor.ac.uk/psychology](http://www.bangor.ac.uk/psychology)
